# Supplementary material for: Brain-wide mapping of neural activity controlling zebrafish exploratory locomotion
Source: eLife. 2016 Mar 22;5:e12741. doi: 10.7554/eLife.12741 (PMC4841782; doi:10.7554/eLife.12741)
Supplement: Supplementary file 2. — DOI: http://dx.doi.org/10.7554/eLife.12741.030 [file elife-12741-supp2.xls]

## Sheet: Z-BrainQuant_GreenTuning
ROI name	Signal in ROI	Top Label	Signal	2nd Label	Signal	3rd Label	Signal	4th Label	Signal	5th Label	Signal
Rhombencephalon - Vglut2 cluster 3	6193.32	Isl1-GFP	1.6907	Elavl3-H2BRFP	1.3604	Vglut2a-GFP	1.2496	EtVmat2-GFP	1.0913	Oxtl-GFP	0.95396
Rhombencephalon - Glyt2 Cluster 5	6075.37	Glyt2-GFP	1.6342	Elavl3-H2BRFP	1.6334	6.7FRhcrtR-Gal4-uasKaede	1.3397	Oxtl-GFP	0.94725	Qrfp-GFP	0.92359
Rhombencephalon - Isl1 Cluster 1	5022.93	Isl1-GFP	1.7159	S1181tGal4-uasKaede	1.2442	6.7FRhcrtR-Gal4-uasKaede	1.0955	Glyt2-GFP	1.0054	Anti-Zrf1(GFAP)	0.96873
Rhombencephalon - Glyt2 Cluster 4	4382.79	Glyt2-GFP	1.9191	Elavl3-H2BRFP	1.5926	SpinalBackfills	1.4975	6.7FRhcrtR-Gal4-uasKaede	1.262	Elavl3-GCaMP5G	0.95097
Rhombencephalon - Inferior Olive	3533.53	Elavl3-H2BRFP	4.1673	Vglut2a-GFP	3.4568	Ptf1aGal4-uasKaede	2.9281	Elavl3-GCaMP5G	1.9916	Anti-Zn1	1.9297
Rhombencephalon - Vmat2 Cluster 2	3510.72	EtVmat2-GFP	2.1816	Elavl3-H2BRFP	1.7303	S1181tGal4-uasKaede	1.4319	Glyt2-GFP	1.14	Vglut2a-GFP	1.0206
Rhombencephalon - VII Facial Motor and octavolateralis efferent neurons	3478.5	Isl1-GFP	2.164	Elavl3-H2BRFP	1.2666	Oxtl-GFP	0.95184	EtVmat2-GFP	0.9493	Hcrt-RFP	0.94437
Rhombencephalon - Vglut2 cluster 1	3007.33	Anti-tERK	1.0045	Vglut2a-GFP	0.99812	Oxtl-GFP	0.97147	S1181tGal4-uasKaede	0.91483	Hcrt-RFP	0.91233
Rhombencephalon - Vmat2 Cluster 5	2572.09	EtVmat2-GFP	2.1758	Elavl3-H2BRFP	1.0102	Elavl3-GCaMP5G	0.97509	Isl1-GFP	0.97201	Oxtl-GFP	0.96612
Rhombencephalon - 6.7FDhcrtR-Gal4 Cluster 1	2487.18	6.7FRhcrtR-Gal4-uasKaede	2.1123	Elavl3-H2BRFP	1.6527	Oxtl-GFP	0.9583	Glyt2-GFP	0.94403	S1181tGal4-uasKaede	0.90014
Rhombencephalon - Gad1b Cluster 15	2400.04	Elavl3-H2BRFP	1.7539	EtVmat2-GFP	1.4291	Glyt2-GFP	1.4179	Ptf1aGal4-uasKaede	1.1938	S1181tGal4-uasKaede	1.0966
Rhombencephalon - MiV1	2346.9	SpinalBackfills	3.7707	Elavl3-H2BRFP	1.709	Anti-GlyR	1.6887	Anti-Znp1(Synaptotagmin2)	1.5076	Anti-Zn1	1.2303
Rhombencephalon - Otpb Cluster 4	2310.6	Otpb.A-Gal4-UAS-GCaMP_6	1.2718	Anti-Zn1	1.2305	Anti-Zrf1(GFAP)	1.034	Anti-Gad67	1.0169	Anti-tERK	1.0023
Rhombencephalon - MiT	2307.05	Elavl3-H2BRFP	2.1801	SpinalBackfills	1.9053	Anti-Znp1(Synaptotagmin2)	1.4096	Anti-GlyR	1.2017	Isl2bGal4-uasDendra	1.1947
Rhombencephalon - Gad1b Cluster 11	2291.19	Elavl3-H2BRFP	1.8417	Gad1b-GFP	1.4062	SpinalBackfills	1.1324	Anti-tERK	0.9946	Qrfp-GFP	0.9604
Rhombencephalon - RoV3	2286.33	SpinalBackfills	2.0272	Anti-GlyR	1.744	Anti-Znp1(Synaptotagmin2)	1.2318	Elavl3-H2BRFP	1.2299	Elavl3-GCaMP5G	1.0751
Rhombencephalon - Vglut2 Stripe 3	2116.87	Elavl3-H2BRFP	1.4379	Glyt2-GFP	1.0917	Anti-Zn1	0.97337	Oxtl-GFP	0.94491	Anti-tERK	0.89625
Rhombencephalon - Gad1b Cluster 10	2115.89	Elavl3-H2BRFP	1.8296	SpinalBackfills	1.8098	EtVmat2-GFP	1.1025	Vglut2a-GFP	1.0925	Gad1b-GFP	1.0131
Rhombencephalon - MiR2	2088.71	SpinalBackfills	4.1177	Elavl3-H2BRFP	1.7973	EtVmat2-GFP	1.2755	Anti-GlyR	1.0817	Vglut2a-GFP	0.99663
Rhombencephalon - Vmat2 Cluster 3	2037.61	6.7FRhcrtR-Gal4-uasKaede	2.765	Elavl3-H2BRFP	1.6284	EtVmat2-GFP	1.3284	Oxtl-GFP	0.95713	Anti-tERK	0.881
Rhombencephalon - 6.7FDhcrtR-Gal4 Cluster 3	2030.29	Elavl3-H2BRFP	1.9856	6.7FRhcrtR-Gal4-uasKaede	1.8073	Anti-Znp1(Synaptotagmin2)	1.5364	Isl2bGal4-uasDendra	1.436	Anti-GlyR	1.414
Rhombencephalon - Vmat2 Cluster 4	1948.09	EtVmat2-GFP	2.523	Elavl3-H2BRFP	1.8968	6.7FRhcrtR-Gal4-uasKaede	1.7501	Vglut2a-GFP	1.3465	Glyt2-GFP	1.0173
Rhombencephalon - Anterior Cluster of nV Trigeminal Motorneurons	1938.02	Isl1-GFP	1.9347	Elavl3-H2BRFP	1.2641	SpinalBackfills	1.0046	Qrfp-GFP	0.98855	Oxtl-GFP	0.96895
Rhombencephalon - Glyt2 Cluster 8	1847.5	SpinalBackfills	1.6862	EtVmat2-GFP	1.2294	Gad1b-GFP	1.1351	S1181tGal4-uasKaede	1.116	Anti-Zrf1(GFAP)	1.0854
Rhombencephalon - Glyt2 Cluster 6	1831.38	SpinalBackfills	2.1465	Elavl3-H2BRFP	1.747	Glyt2-GFP	1.4213	Anti-Znp1(Synaptotagmin2)	1.2998	Anti-TH	1.2387
Rhombencephalon - MiD2	1762.99	SpinalBackfills	5.2333	Elavl3-H2BRFP	1.4052	Anti-GlyR	1.3728	6.7FRhcrtR-Gal4-uasKaede	1.2603	Qrfp-GFP	1.188
Rhombencephalon - MiV2	1709.47	SpinalBackfills	4.0044	Elavl3-H2BRFP	2.2422	Anti-GlyR	1.1419	Isl2bGal4-uasDendra	1.116	Anti-Znp1(Synaptotagmin2)	1.0705
Rhombencephalon - MiR1	1642.08	SpinalBackfills	5.1287	Elavl3-H2BRFP	1.7265	Oxtl-GFP	0.98425	Vglut2a-GFP	0.9678	Hcrt-RFP	0.94467
Rhombencephalon - Gad1b Stripe 1	1618.72	Gad1b-GFP	3.1082	Elavl3-H2BRFP	1.7311	Elavl3-GCaMP5G	1.5785	Anti-5HT	1.3706	EtVmat2-GFP	1.1345
Rhombencephalon - Glyt2 Stripe 3	1581.89	Glyt2-GFP	1.804	Elavl3-H2BRFP	1.5021	Anti-Zn1	1.1238	Anti-tERK	0.95212	Oxtl-GFP	0.94844
Rhombencephalon - Medial Vestibular Nucleus	1511.77	6.7FRhcrtR-Gal4-uasKaede	2.5086	Elavl3-H2BRFP	1.4131	Qrfp-GFP	1.2972	SpinalBackfills	1.2421	Vglut2a-GFP	1.163
Rhombencephalon - Glyt2 Cluster 1	1497.17	S1181tGal4-uasKaede	1.5302	Glyt2-GFP	1.5026	Elavl3-H2BRFP	1.4709	6.7FRhcrtR-Gal4-uasKaede	1.231	Oxtl-GFP	0.96142
Rhombencephalon - Gad1b Stripe 3	1388.14	Elavl3-H2BRFP	1.3424	Vglut2a-GFP	1.2959	Oxtl-GFP	0.9308	Qrfp-GFP	0.89562	Gad1b-GFP	0.87416
Rhombencephalon - Gad1b Cluster 16	1354.49	Isl1-GFP	1.5253	Elavl3-H2BRFP	1.3123	Gad1b-GFP	1.2205	Oxtl-GFP	0.96502	Qrfp-GFP	0.90503
Rhombencephalon - Gad1b Cluster 9	1166.65	EtVmat2-GFP	1.5051	Anti-Zrf1(GFAP)	1.2471	Anti-Zn1	1.1708	Elavl3-GCaMP5G	1.1206	Gad1b-GFP	1.1084
Rhombencephalon - MiD3	1136.3	SpinalBackfills	5.209	Isl1-GFP	1.8507	Elavl3-H2BRFP	1.6463	S1181tGal4-uasKaede	1.6336	Glyt2-GFP	1.3953
Rhombencephalon - MiM1	1128.34	SpinalBackfills	5.7338	Anti-Zrf1(GFAP)	1.3206	Anti-Zn1	1.2956	S1181tGal4-uasKaede	1.1971	Oxtl-GFP	1.1503
Rhombencephalon - Glyt2 Cluster 7	1123.83	SpinalBackfills	2.5417	Anti-Zrf1(GFAP)	1.565	Anti-Zn1	1.1182	Glyt2-GFP	1.1122	S1181tGal4-uasKaede	1.1069
Rhombencephalon - Rhombomere 6	1109.36	Vglut2a-GFP	3.3302	Elavl3-H2BRFP	2.1788	Anti-Zn1	1.9788	Anti-Znp1(Synaptotagmin2)	1.9201	Elavl3-GCaMP5G	1.8881
Rhombencephalon - 6.7FDhcrtR-Gal4 Stripe 3	1040.68	6.7FRhcrtR-Gal4-uasKaede	2.0973	Vglut2a-GFP	1.9579	Elavl3-H2BRFP	1.2698	S1181tGal4-uasKaede	1.0403	Elavl3-GCaMP5G	1.0347
Telencephalon - Subpallial Vglut2 Cluster	1036.46	Vglut2a-GFP	3.6773	Elavl3-H2BRFP	3.1221	Anti-5HT	2.4859	Anti-tERK	2.2051	Gad1b-GFP	1.8748
Rhombencephalon - Rhombomere 5	1022.53	Anti-GlyR	2.0208	6.7FRhcrtR-Gal4-uasKaede	1.9448	Anti-Znp1(Synaptotagmin2)	1.858	Anti-Zn1	1.6672	Anti-Zrf2	1.5582
Rhombencephalon - Rhombomere 2	947.417	Vglut2a-GFP	1.5713	Anti-5HT	1.4964	Anti-GlyR	1.4659	S1181tGal4-uasKaede	1.4151	Elavl3-H2BRFP	1.3743
Rhombencephalon - Gad1b Cluster 8	946.084	Elavl3-H2BRFP	1.1863	Vglut2a-GFP	1.0205	Gad1b-GFP	1.0152	EtVmat2-GFP	0.99363	Elavl3-GCaMP5G	0.99305
Telencephalon - S1181t Cluster	910.007	Gad1b-GFP	2.2266	Elavl3-H2BRFP	1.7348	Elavl3-GCaMP5G	1.198	Anti-5HT	1.0622	Isl1-GFP	1.0588
Mesencephalon - Otpb Cluster	873.654	Isl1-GFP	2.1119	Otpb.A-Nsfb-GFP	1.7155	Anti-GlyR	1.1983	Elavl3-H2BRFP	1.1714	EtVmat2-GFP	1.1276
Rhombencephalon - Isl1 Cluster 2	845.184	Isl1-GFP	1.7026	Anti-Zrf1(GFAP)	1.085	Anti-Zn1	1.0738	Oxtl-GFP	0.97441	Hcrt-RFP	0.92028
Rhombencephalon - Rhombomere 3	789.703	Anti-GlyR	1.7142	Anti-Znp1(Synaptotagmin2)	1.3741	Anti-Zrf2	1.2387	SpinalBackfills	1.2204	S1181tGal4-uasKaede	1.1974
Rhombencephalon - Vglut2 Stripe 4	778.241	Vglut2a-GFP	1.5409	Elavl3-H2BRFP	1.3643	SpinalBackfills	1.1881	S1181tGal4-uasKaede	0.9821	Oxtl-GFP	0.94146
Rhombencephalon - Vglut2 Stripe 2	772.207	Gad1b-GFP	1.6161	EtVmat2-GFP	1.5894	Elavl3-H2BRFP	1.3224	Glyt2-GFP	1.1064	Anti-5HT	1.0943
Telencephalon - Subpallial Otpb Cluster 2	761.723	Gad1b-GFP	2.5366	Elavl3-H2BRFP	1.7268	Elavl3-GCaMP5G	1.3427	Isl1-GFP	1.2604	Anti-5HT	1.1769
Rhombencephalon - VII' Facial Motor and octavolateralis efferent neurons	746.035	S1181tGal4-uasKaede	1.6185	Vglut2a-GFP	1.5848	Elavl3-H2BRFP	1.5312	SpinalBackfills	1.3257	Isl1-GFP	1.2139
Rhombencephalon - Isl1 Stripe 1	729.415	Elavl3-H2BRFP	1.5623	Gad1b-GFP	1.3618	Vglut2a-GFP	0.93719	Isl1-GFP	0.93346	Oxtl-GFP	0.89007
Diencephalon - Preoptic area Vglut2 cluster	725.469	Anti-Zrf2	3.3698	Anti-5HT	2.7092	Anti-tERK	2.5479	Elavl3-H2BRFP	2.4971	Otpb.A-Gal4-UAS-GCaMP_6	2.4409
Rhombencephalon - RoM3	718.951	SpinalBackfills	5.1807	6.7FRhcrtR-Gal4-uasKaede	2.249	Elavl3-H2BRFP	1.3199	Anti-GlyR	1.1657	Hcrt-RFP	1.0521
Rhombencephalon - Otpb Cluster 1	688.824	Vglut2a-GFP	1.812	Elavl3-H2BRFP	1.6766	Otpb.A-Nsfb-GFP	1.4911	EtVmat2-GFP	1.323	S1181tGal4-uasKaede	1.2707
Rhombencephalon - Otpb Cluster 6	660.259	Elavl3-H2BRFP	1.6375	6.7FRhcrtR-Gal4-uasKaede	1.5629	SpinalBackfills	1.1624	Isl1-GFP	1.0088	Elavl3-GCaMP5G	0.98868
Rhombencephalon - Gad1b Stripe 2	656.218	Elavl3-H2BRFP	1.5951	6.7FRhcrtR-Gal4-uasKaede	1.5672	Gad1b-GFP	1.0717	Oxtl-GFP	0.94925	Anti-tERK	0.92421
Telencephalon - Subpallium	645.021	Gad1b-GFP	3.6758	Elavl3-H2BRFP	1.9467	EtVmat2-GFP	1.8792	Anti-5HT	1.6525	Elavl3-GCaMP5G	1.5743
Rhombencephalon - Oxtl Cluster 1 Sparse	644.625	Gad1b-GFP	1.3894	Elavl3-H2BRFP	1.1067	Oxtl-GFP	1.057	Qrfp-GFP	0.90136	Hcrt-RFP	0.87433
Rhombencephalon - Otpb Cluster 2 - locus coeruleus	621.812	EtVmat2-GFP	2.9819	Otpb.A-Nsfb-GFP	2.8019	Anti-TH	2.0768	Elavl3-H2BRFP	1.7824	Hcrt-RFP	1.3916
Telencephalon - Vmat2 cluster	597.175	EtVmat2-GFP	3.0302	Gad1b-GFP	1.9482	Elavl3-H2BRFP	1.7288	Anti-Zn1	1.1778	Anti-5HT	1.1461
Rhombencephalon - Glyt2 Cluster 2	590.643	EtVmat2-GFP	1.8809	Elavl3-H2BRFP	1.6516	Ptf1aGal4-uasKaede	1.4693	Glyt2-GFP	1.4489	Vglut2a-GFP	1.1383
Telencephalon - Isl1 cluster 1	581.022	Gad1b-GFP	3.2103	Isl1-GFP	2.2586	Elavl3-H2BRFP	2.0084	Elavl3-GCaMP5G	1.9534	Anti-5HT	1.474
Rhombencephalon - Locus Coreuleus	571.901	EtVmat2-GFP	2.103	Elavl3-H2BRFP	1.7683	Otpb.A-Nsfb-GFP	1.7035	Anti-TH	1.6308	Vglut2a-GFP	1.3525
Rhombencephalon - 6.7FDhcrtR-Gal4 Stripe 1	561.667	Gad1b-GFP	3.204	6.7FRhcrtR-Gal4-uasKaede	1.8574	Elavl3-H2BRFP	1.7011	Elavl3-GCaMP5G	1.2264	Anti-5HT	1.1691
Rhombencephalon - S1181t Cluster	543.067	Vglut2a-GFP	2.2788	S1181tGal4-uasKaede	2.2719	Elavl3-H2BRFP	1.7391	Anti-5HT	1.135	EtVmat2-GFP	1.0477
Rhombencephalon - RoL-R1	529.362	SpinalBackfills	3.923	Elavl3-H2BRFP	1.691	Anti-TH	1.5149	Anti-GlyR	1.3707	6.7FRhcrtR-Gal4-uasKaede	1.3582
Rhombencephalon -	525.792	Anti-GlyR	3.4168	Anti-Zn1	2.5573	Anti-5HT	2.5126	Elavl3-H2BRFP	2.2887	Anti-Znp1(Synaptotagmin2)	2.1657
Rhombencephalon - Gad1b Cluster 17	509.894	Gad1b-GFP	1.419	Elavl3-H2BRFP	1.0681	EtVmat2-GFP	1.0233	Oxtl-GFP	0.97208	Anti-tERK	0.96944
Rhombencephalon - Glyt2 Stripe 2	492.511	Elavl3-H2BRFP	1.3811	Glyt2-GFP	1.2895	Isl1-GFP	1.0936	Gad1b-GFP	1.0311	Oxtl-GFP	0.95208
Rhombencephalon - Otpb Cluster 5	490.154	S1181tGal4-uasKaede	2.1406	Otpb.A-Nsfb-GFP	1.8153	Elavl3-H2BRFP	1.5509	Glyt2-GFP	1.3794	SpinalBackfills	1.0953
Telencephalon - Subpallial Gad1b cluster	488.415	Gad1b-GFP	4.0415	EtVmat2-GFP	1.9489	Elavl3-H2BRFP	1.7587	Elavl3-GCaMP5G	1.4344	Anti-5HT	1.3966
Rhombencephalon - Oxtl Cluster 2 Near MC axon cap	481.655	Anti-Zn1	1.486	Oxtl-GFP	1.316	Anti-Znp1(Synaptotagmin2)	1.3077	6.7FRhcrtR-Gal4-uasKaede	1.2733	Hcrt-RFP	1.0959
Diencephalon - Otpb Cluster 3	480.92	Vglut2a-GFP	2.0189	Otpb.A-Nsfb-GFP	1.8995	Elavl3-H2BRFP	1.7503	Anti-GlyR	1.497	Anti-Zrf2	1.4791
Rhombencephalon - Gad1b Cluster 1	478.236	Gad1b-GFP	1.809	Oxtl-GFP	0.98326	Anti-tERK	0.92857	Qrfp-GFP	0.91677	Anti-TH	0.91291
Rhombencephalon - CaD	459.992	SpinalBackfills	5.8955	Elavl3-H2BRFP	1.7433	Vglut2a-GFP	1.5655	Gad1b-GFP	1.3405	Isl2bGal4-uasDendra	1.2516
Rhombencephalon - Gad1b Cluster 4	454.961	Elavl3-H2BRFP	1.4285	Gad1b-GFP	1.2989	Ptf1aGal4-uasKaede	0.96752	Oxtl-GFP	0.9501	S1181tGal4-uasKaede	0.90732
Rhombencephalon - Rhombomere 4	452.984	Anti-GlyR	1.892	Anti-Znp1(Synaptotagmin2)	1.5627	SpinalBackfills	1.5623	S1181tGal4-uasKaede	1.454	Anti-Zn1	1.3915
Diencephalon - Preoptic Otpb Cluster	445.399	Otpb.A-Nsfb-GFP	2.7318	Anti-Zrf2	2.4994	Anti-Zn1	2.064	Anti-5HT	2.0265	Otpb.A-Gal4-UAS-GCaMP_6	1.9666
Rhombencephalon - Spiral Fiber Neuron Anterior cluster	444.015	6.7FRhcrtR-Gal4-uasKaede	5.6127	SpinalBackfills	2.0134	Elavl3-H2BRFP	1.2782	Qrfp-GFP	1.0383	Hcrt-RFP	1.0342
Rhombencephalon - Gad1b Cluster 2	436.486	Gad1b-GFP	1.3431	Elavl3-H2BRFP	1.0064	Oxtl-GFP	0.98452	Qrfp-GFP	0.87391	Hcrt-RFP	0.85988
Mesencephalon - Oxtl Cluster Sparse	432.729	Anti-Zrf1(GFAP)	1.6784	Elavl3-H2BRFP	1.4342	Oxtl-GFP	1.0643	Elavl3-GCaMP5G	0.98659	Qrfp-GFP	0.95304
Rhombencephalon - Lobus caudalis cerebelli	432.182	Anti-Zn1	1.7959	Isl1-GFP	1.6069	Pet1-GFP	1.571	Otpb.A-Gal4-UAS-GCaMP_6	1.5635	Olig2-GFP	1.5568
Rhombencephalon - Glyt2 Stripe 1	418.27	Gad1b-GFP	2.7209	Elavl3-GCaMP5G	1.6338	Elavl3-H2BRFP	1.4222	Ptf1aGal4-uasKaede	1.3287	Glyt2-GFP	1.1753
Mesencephalon - Oculomotor Nucleus nIII	407.012	Isl1-GFP	2.0113	Anti-Zrf1(GFAP)	1.8443	SpinalBackfills	1.6782	6.7FRhcrtR-Gal4-uasKaede	1.5583	Anti-Znp1(Synaptotagmin2)	1.5419
Rhombencephalon - RoM1	399.798	SpinalBackfills	1.742	Elavl3-H2BRFP	1.4564	Gad1b-GFP	1.1055	Isl2bGal4-uasDendra	0.98377	Hcrt-RFP	0.97341
Rhombencephalon - Rhombomere 7	396.211	Gad1b-GFP	4.2225	Anti-GlyR	3.2586	Elavl3-GCaMP5G	3.0461	Elavl3-H2BRFP	2.8472	Anti-Zrf2	2.8077
Rhombencephalon - Oculomotor Nucleus nIV	393.44	Isl1-GFP	2.5582	6.7FRhcrtR-Gal4-uasKaede	2.0428	Anti-Znp1(Synaptotagmin2)	1.9338	Anti-Zn1	1.2317	Anti-GlyR	1.1946
Mesencephalon - NucMLF (nucleus of the medial longitudinal fascicle)	391.401	SpinalBackfills	4.7842	Anti-Znp1(Synaptotagmin2)	2.4439	6.7FRhcrtR-Gal4-uasKaede	2.4017	Anti-GlyR	1.9521	Anti-Zn1	1.3839
Rhombencephalon - X Vagus motorneuron cluster	368.065	Isl1-GFP	1.9836	Gad1b-GFP	1.6741	Elavl3-H2BRFP	1.6138	Anti-GlyR	1.0967	Anti-5HT	1.0899
Spinal Cord - 6.7FDhcrtR-Gal4 Stripe	359.424	Elavl3-H2BRFP	2.4413	6.7FRhcrtR-Gal4-uasKaede	2.267	Gad1b-GFP	1.649	Elavl3-GCaMP5G	1.5999	Anti-Zrf2	1.3846
Mesencephalon - Torus Longitudinalis	355.674	Anti-Zrf1(GFAP)	2.1576	Elavl3-H2BRFP	2.0182	Anti-Zrf2	1.8146	Elavl3-GCaMP5G	1.8068	S1181tGal4-uasKaede	1.7356
Rhombencephalon - RoM2	353.676	SpinalBackfills	3.8531	Elavl3-H2BRFP	1.5593	Isl1-GFP	1.5202	Anti-GlyR	1.1311	Qrfp-GFP	1.1247
Telencephalon -	350.219	Anti-tERK	4.9184	Anti-5HT	4.351	Anti-Zrf2	4.3265	Anti-Zn1	3.4141	Elavl3-GCaMP5G	3.3142
Telencephalon - Olfactory bulb dopaminergic neuron areas	345.011	Gad1b-GFP	3.5781	EtVmat2-GFP	2.7629	Anti-tERK	1.7185	Anti-Zn12(Hnk-1)	1.6363	Anti-5HT	1.6167
Diencephalon - Hypothalamus Vglut2 Cluster 5	337.161	Vglut2a-GFP	1.5216	Anti-Zrf1(GFAP)	1.1127	Gad1b-GFP	1.1118	Ptf1aGal4-uasKaede	1.0755	Anti-tERK	1.0291
Rhombencephalon - 6.7FDhcrtR-Gal4 Cluster 5	329.551	Vglut2a-GFP	1.9159	EtVmat2-GFP	1.8825	6.7FRhcrtR-Gal4-uasKaede	1.8618	Elavl3-H2BRFP	1.7872	Gad1b-GFP	1.7081
Mesencephalon - Vglut2 cluster 1	325.921	Vglut2a-GFP	2.2552	SpinalBackfills	1.1112	Elavl3-H2BRFP	0.98454	Oxtl-GFP	0.96634	Hcrt-RFP	0.95355
Diencephalon - Anterior preoptic dopaminergic cluster	318.635	Gad1b-GFP	2.5296	Otpb.A-Nsfb-GFP	2.5004	Anti-TH	2.124	Elavl3-H2BRFP	1.8159	Anti-5HT	1.7064
Rhombencephalon - 6.7FDhcrtR-Gal4 Stripe 4	308.01	6.7FRhcrtR-Gal4-uasKaede	2.342	S1181tGal4-uasKaede	1.4868	Vglut2a-GFP	1.2868	Elavl3-GCaMP5G	1.2328	Elavl3-H2BRFP	1.1377
Rhombencephalon - Gad1b Cluster 18	303.079	Gad1b-GFP	2.4704	Ptf1aGal4-uasKaede	1.6974	Elavl3-H2BRFP	1.641	S1181tGal4-uasKaede	1.2986	Anti-5HT	1.2947
Rhombencephalon - Neuropil Region 5	301.427	Anti-GlyR	2.5575	Anti-Zrf2	2.0537	Anti-Znp1(Synaptotagmin2)	2.0377	Isl2bGal4-uasDendra	1.5869	Anti-Zn1	1.5516
Rhombencephalon - Gad1b Cluster 6	299.539	Elavl3-H2BRFP	1.6034	S1181tGal4-uasKaede	1.3875	Gad1b-GFP	1.2168	Qrfp-GFP	1.0321	Oxtl-GFP	0.97092
Rhombencephalon - Spiral Fiber Neuron Posterior cluster	296.715	6.7FRhcrtR-Gal4-uasKaede	3.7982	SpinalBackfills	1.8499	Elavl3-H2BRFP	1.3834	Isl1-GFP	1.1414	Qrfp-GFP	1.004
Mesencephalon - Sparse 6.7FRhcrtR cluster	295.88	6.7FRhcrtR-Gal4-uasKaede	1.6115	Anti-GlyR	1.5456	Anti-Znp1(Synaptotagmin2)	1.4979	Elavl3-H2BRFP	1.3134	Qrfp-GFP	1.1954
Telencephalon - Subpallial dopaminergic cluster	291.273	EtVmat2-GFP	2.2081	Gad1b-GFP	1.8491	Elavl3-H2BRFP	1.6506	Anti-5HT	0.98904	Anti-TH	0.94574
Rhombencephalon - Gad1b Cluster 12	285.126	SpinalBackfills	3.9613	Gad1b-GFP	1.4508	Elavl3-H2BRFP	1.4507	Vglut2a-GFP	1.4126	Anti-Znp1(Synaptotagmin2)	1.409
Telencephalon - Olfactory Bulb	277.073	Vglut2a-GFP	5.0714	Elavl3-H2BRFP	3.0621	Anti-Zrf1(GFAP)	2.9725	Elavl3-GCaMP5G	2.8591	Anti-Zn12(Hnk-1)	2.6536
Rhombencephalon - Neuropil Region 6	276.154	Isl2bGal4-uasDendra	1.2152	Gad1b-GFP	1.0957	Anti-Zrf2	1.0789	Anti-Gad67	1.0192	Anti-tERK	1.0128
Rhombencephalon - Ptf1a Stripe	270.151	Gad1b-GFP	3.3239	Elavl3-GCaMP5G	1.6886	Elavl3-H2BRFP	1.6237	Ptf1aGal4-uasKaede	1.4784	Anti-5HT	1.357
Mesencephalon - Tegmentum	267.85	Elavl3-H2BRFP	1.1876	Elavl3-GCaMP5G	1.1091	SpinalBackfills	1.103	Gad1b-GFP	1.0933	Anti-Zrf1(GFAP)	1.0703
Telencephalon - Anterior Commisure	262.366	Anti-Zrf2	5.0009	Anti-tERK	3.8417	Anti-Zn1	3.0266	Anti-Gad67	2.9903	Anti-Zn12(Hnk-1)	2.7878
Telencephalon - Isl1 cluster 2	261.8	Gad1b-GFP	1.7599	Elavl3-H2BRFP	1.6481	Isl1-GFP	1.449	Anti-Zrf2	1.2553	Anti-tERK	1.1595
Rhombencephalon - Vmat2 Stripe3	259.862	Elavl3-H2BRFP	1.2386	EtVmat2-GFP	1.2347	Glyt2-GFP	0.97064	Oxtl-GFP	0.94957	Anti-Zn1	0.91062
Rhombencephalon - Isl1 Cluster 3	258.889	Vglut2a-GFP	1.5886	Glyt2-GFP	1.0241	Elavl3-H2BRFP	1.0228	Oxtl-GFP	0.96505	Isl1-GFP	0.92918
Diencephalon - Preoptic Area	253.891	Oxtl-GFP	1.7598	Elavl3-H2BRFP	1.688	Gad1b-GFP	1.5228	Isl2bGal4-uasDendra	1.134	Otpb.A-Nsfb-GFP	1.068
Ganglia - Statoacoustic Ganglion	253.88	Elavl3-H2BRFP	2.6091	Anti-GlyR	1.4876	6.7FRhcrtR-Gal4-uasKaede	1.34	Anti-Znp1(Synaptotagmin2)	1.2798	Anti-Zn1	1.1721
Rhombencephalon - Olig2 enriched areas in cerebellum	247.856	Olig2-GFP	2.3939	Gad1b-GFP	2.2462	Ptf1aGal4-uasKaede	1.9056	EtVmat2-GFP	1.6831	Vglut2a-GFP	1.5276
Mesencephalon - Ptf1a Cluster	246.882	Ptf1aGal4-uasKaede	1.9366	Elavl3-GCaMP5G	1.2042	Vglut2a-GFP	1.1501	EtVmat2-GFP	1.074	Anti-Zrf1(GFAP)	0.97873
Rhombencephalon - Olig2 Stripe	243.673	EtVmat2-GFP	1.9367	Pet1-GFP	1.7001	Elavl3-GCaMP5G	1.5535	Anti-Zrf1(GFAP)	1.5494	Olig2-GFP	1.484
Diencephalon - Isl1 cluster 1	243.1	Gad1b-GFP	2.0254	Elavl3-H2BRFP	1.9517	Oxtl-GFP	1.4801	Elavl3-GCaMP5G	1.1255	Vglut2a-GFP	0.93694
Rhombencephalon - Ptf1a Cluster 1	237.093	Ptf1aGal4-uasKaede	1.6888	Elavl3-H2BRFP	1.5405	Anti-5HT	1.0895	Gad1b-GFP	1.0728	Qrfp-GFP	1.0427
Mesencephalon - Isl1 cluster of the mesencephalic region	236.03	Elavl3-GCaMP5G	1.542	Gad1b-GFP	1.4695	Vglut2a-GFP	1.3568	Elavl3-H2BRFP	1.3528	Isl1-GFP	1.1834
Rhombencephalon - Mauthner Cell Axon Cap	235.08	6.7FRhcrtR-Gal4-uasKaede	5.0262	Anti-Znp1(Synaptotagmin2)	2.6428	Anti-Zn1	1.6722	Oxtl-GFP	1.3451	Hcrt-RFP	1.3206
Rhombencephalon - Lateral Reticular Nucleus	229.996	Anti-Zrf1(GFAP)	3.0994	Ptf1aGal4-uasKaede	2.0632	Anti-Zn1	1.8827	Anti-5HT	1.752	Anti-GlyR	1.5513
Diencephalon - Hypothalamus - Caudal Hypothalamus Neural Cluster	228.572	Anti-5HT	2.666	EtVmat2-GFP	2.0581	Anti-GlyR	1.7442	Anti-Zrf2	1.3121	Ptf1aGal4-uasKaede	1.3068
Rhombencephalon - Neuropil Region 3	227.369	Anti-GlyR	4.2208	Anti-Zrf2	4.1795	Anti-Znp1(Synaptotagmin2)	3.4526	Elavl3-GCaMP5G	2.5923	Anti-tERK	2.394
Rhombencephalon - Vglut2 Stripe 1	226.24	Vglut2a-GFP	5.8684	Elavl3-H2BRFP	3.067	Elavl3-GCaMP5G	1.9512	Anti-5HT	1.8199	Pet1-GFP	1.4742
Telencephalon - Pallium	225.471	Anti-tERK	3.96	Vglut2a-GFP	3.4197	Anti-5HT	3.2568	Anti-Zrf2	3.2101	Anti-Zn1	2.707
Rhombencephalon - Vmat2 Cluster 1	214.986	EtVmat2-GFP	2.4309	S1181tGal4-uasKaede	1.9044	Elavl3-H2BRFP	1.6177	Vglut2a-GFP	1.5201	Elavl3-GCaMP5G	0.96358
Diencephalon - Anterior group of the posterior tubercular vmat2 neurons	212.898	Hcrt-RFP	3.7499	EtVmat2-GFP	2.4249	Oxtl-GFP	2.3381	Elavl3-H2BRFP	2.1327	Qrfp-GFP	1.1751
Diencephalon - Oxtl Cluster 1 in Preoptic Area	211.895	Oxtl-GFP	6.2343	Elavl3-H2BRFP	2.0522	Otpb.A-Nsfb-GFP	1.2618	Gad1b-GFP	1.1134	Vglut2a-GFP	1.0426
Diencephalon - Optic Chiasm	205.769	Isl2bGal4-uasDendra	33.4307	Elavl3-GCaMP5G	2.185	Anti-Zn12(Hnk-1)	2.083	Anti-Zn1	2.0005	Elavl3-H2BRFP	1.9656
Rhombencephalon - Olig2 Cluster	203.01	Olig2-GFP	2.7898	Vglut2a-GFP	2.2164	Anti-5HT	1.9309	Ptf1aGal4-uasKaede	1.7937	Elavl3-H2BRFP	1.7603
Rhombencephalon - 6.7FDhcrtR-Gal4 Cluster 2 Sparse	201.441	Elavl3-H2BRFP	1.5626	6.7FRhcrtR-Gal4-uasKaede	1.389	Ptf1aGal4-uasKaede	1.0771	Glyt2-GFP	1.0085	Oxtl-GFP	0.97343
Diencephalon - Caudal Hypothalamus	198.425	Anti-5HT	1.7849	EtVmat2-GFP	1.5676	Anti-GlyR	1.543	Anti-Zrf2	1.3633	Ptf1aGal4-uasKaede	1.1737
Rhombencephalon - Mauthner	198.289	SpinalBackfills	5.2765	S1181tGal4-uasKaede	5.1749	Anti-GlyR	1.5289	6.7FRhcrtR-Gal4-uasKaede	1.2665	Anti-Znp1(Synaptotagmin2)	1.2263
Rhombencephalon - Rhombomere 1	198.171	Ptf1aGal4-uasKaede	2.2059	Olig2-GFP	1.5218	EtVmat2-GFP	1.4896	Gad1b-GFP	1.4829	Anti-5HT	1.3327
Diencephalon - Otpb Cluster 2	197.148	Oxtl-GFP	6.6468	Elavl3-H2BRFP	1.8091	Otpb.A-Nsfb-GFP	1.4304	Gad1b-GFP	1.0775	Vglut2a-GFP	0.90615
Diencephalon - Right Habenula Vglut2 Cluster	196.472	Vglut2a-GFP	5.2662	Anti-Zrf1(GFAP)	1.8417	Elavl3-H2BRFP	1.647	Anti-Zn12(Hnk-1)	1.6037	Anti-5HT	1.3803
Rhombencephalon - Vmat2 Stripe1	194.896	Elavl3-H2BRFP	2.3878	Elavl3-GCaMP5G	2.1256	EtVmat2-GFP	2.0671	Gad1b-GFP	2.0393	Anti-5HT	1.9103
Rhombencephalon - 6.7FDhcrtR-Gal4 Stripe 2	189.033	6.7FRhcrtR-Gal4-uasKaede	2.7511	Elavl3-H2BRFP	2.2064	Vglut2a-GFP	1.6546	Anti-5HT	1.2638	Elavl3-GCaMP5G	1.209
Telencephalon - Olig2 Cluster	187.556	Gad1b-GFP	2.4734	Olig2-GFP	1.3781	Elavl3-GCaMP5G	1.2434	Oxtl-GFP	0.94297	Qrfp-GFP	0.90926
Rhombencephalon - Cerebellum Gad1b Enriched Areas	187.441	Ptf1aGal4-uasKaede	4.1022	Gad1b-GFP	3.1697	Olig2-GFP	2.9207	EtVmat2-GFP	2.5279	Otpb.A-Gal4-UAS-GCaMP_6	2.2566
Telencephalon - Vglut2 rind	181.598	Vglut2a-GFP	4.6343	Elavl3-H2BRFP	2.3986	Anti-5HT	2.3675	Elavl3-GCaMP5G	1.8263	Otpb.A-Gal4-UAS-GCaMP_6	1.7814
Rhombencephalon - Caudal Ventral Cluster Labelled by Spinal Backfills	178.042	SpinalBackfills	1.8882	Vglut2a-GFP	1.4349	Elavl3-H2BRFP	1.4254	Isl2bGal4-uasDendra	1.2828	Elavl3-GCaMP5G	1.2108
Diencephalon - Dopaminergic Cluster 3 - hypothalamus	174.026	Hcrt-RFP	4.0794	EtVmat2-GFP	1.7075	Elavl3-H2BRFP	1.3654	Anti-5HT	1.2416	S1181tGal4-uasKaede	1.1821
Rhombencephalon - Corpus Cerebelli	172.303	Ptf1aGal4-uasKaede	2.5937	Olig2-GFP	1.8049	EtVmat2-GFP	1.7907	Gad1b-GFP	1.7055	Anti-Zn12(Hnk-1)	1.5209
Rhombencephalon - Gad1b Cluster 5	166.397	Elavl3-H2BRFP	1.5329	Gad1b-GFP	1.3017	6.7FRhcrtR-Gal4-uasKaede	1.2631	S1181tGal4-uasKaede	0.99496	Oxtl-GFP	0.97199
Diencephalon - Oxtl Cluster 3	165.479	Oxtl-GFP	2.6513	Elavl3-H2BRFP	2.2477	Hcrt-RFP	1.984	Qrfp-GFP	1.7092	6.7FRhcrtR-Gal4-uasKaede	1.5368
Telencephalon - Optic Commissure	165.29	Isl2bGal4-uasDendra	22.696	Elavl3-GCaMP5G	2.1188	Anti-Zn12(Hnk-1)	1.8946	Anti-Zn1	1.7758	S1181tGal4-uasKaede	1.7114
Rhombencephalon - Otpb Cluster 3	164.851	Otpb.A-Nsfb-GFP	1.414	S1181tGal4-uasKaede	1.2857	Oxtl-GFP	0.98337	Hcrt-RFP	0.97572	Anti-tERK	0.96969
Diencephalon - Habenula	164.81	Vglut2a-GFP	4.8224	Anti-Zrf1(GFAP)	2.1917	Elavl3-H2BRFP	2.0254	Anti-Zn12(Hnk-1)	1.6729	Anti-5HT	1.6148
Rhombencephalon - Glyt2 Cluster 9	158.964	Anti-Znp1(Synaptotagmin2)	1.7253	Anti-GlyR	1.63	Anti-Zrf2	1.5158	Anti-Zn1	1.4448	Anti-TH	1.4233
Rhombencephalon - Cerebellum	158.867	Ptf1aGal4-uasKaede	3.5815	Olig2-GFP	2.2866	EtVmat2-GFP	2.0666	Gad1b-GFP	1.9525	Otpb.A-Gal4-UAS-GCaMP_6	1.9111
Diencephalon - Hypothalamus 6.7FRhcrtR-Gal4 cluster 2	158.724	Elavl3-H2BRFP	2.1686	6.7FRhcrtR-Gal4-uasKaede	1.8613	Hcrt-RFP	1.2828	Oxtl-GFP	1.2708	Vglut2a-GFP	1.2656
Rhombencephalon - RoL3	156.058	SpinalBackfills	4.0443	Anti-Znp1(Synaptotagmin2)	1.8572	Anti-Zrf2	1.6281	Anti-GlyR	1.4802	6.7FRhcrtR-Gal4-uasKaede	1.417
Rhombencephalon - CaV	149.417	SpinalBackfills	5.1599	Anti-Znp1(Synaptotagmin2)	1.7155	Anti-GlyR	1.4491	Elavl3-H2BRFP	1.4117	Isl2bGal4-uasDendra	1.4116
Mesencephalon - Retinal Arborization Field 9 (AF9)	148.81	Anti-Zrf2	2.593	Elavl3-GCaMP5G	1.856	Isl2bGal4-uasDendra	1.8305	Anti-GlyR	1.7363	EtVmat2-GFP	1.6738
Rhombencephalon - Gad1b Cluster 14	146.937	6.7FRhcrtR-Gal4-uasKaede	2.0309	Elavl3-H2BRFP	1.7857	Vglut2a-GFP	1.6329	Anti-Zn1	1.4983	Anti-5HT	1.2962
Rhombencephalon - Posterior Cluster of nV Trigeminal Motorneurons	146.41	Isl1-GFP	3.143	Anti-GlyR	1.7295	Anti-Znp1(Synaptotagmin2)	1.5816	Anti-Zrf2	1.4494	Anti-TH	1.1914
Diencephalon - Left Habenula Vglut2 Cluster	146.401	Vglut2a-GFP	4.7835	Elavl3-H2BRFP	1.7704	Anti-Zrf1(GFAP)	1.7556	Elavl3-GCaMP5G	1.3796	Anti-Zn12(Hnk-1)	1.3313
Rhombencephalon - Vmat2 Stripe2	145.167	EtVmat2-GFP	1.8759	Gad1b-GFP	1.8263	Elavl3-H2BRFP	1.3591	Isl1-GFP	1.1484	Anti-5HT	1.0883
Rhombencephalon - Vglut2 cluster 2	142.938	Vglut2a-GFP	3.2057	Elavl3-H2BRFP	1.8681	S1181tGal4-uasKaede	1.6729	Anti-5HT	1.3479	Elavl3-GCaMP5G	1.0281
Rhombencephalon - Glyt2 Cluster 12	140.989	6.7FRhcrtR-Gal4-uasKaede	2.5189	Anti-GlyR	1.7725	Anti-Znp1(Synaptotagmin2)	1.5536	Elavl3-H2BRFP	1.378	Glyt2-GFP	1.2754
Ganglia - Olfactory Epithelium	138.13	Elavl3-H2BRFP	4.6976	Vglut2a-GFP	3.3161	Olig2-GFP	3.1522	Pet1-GFP	3.1483	Otpb.A-Gal4-UAS-GCaMP_6	3.1215
Diencephalon - Pretectum	134.269	Anti-Zrf1(GFAP)	1.72	EtVmat2-GFP	1.5586	Elavl3-H2BRFP	1.3115	Gad1b-GFP	1.2446	Qrfp-GFP	1.0142
Diencephalon - Preoptic area posterior dopaminergic cluster	128.935	Elavl3-H2BRFP	2.6422	Isl2bGal4-uasDendra	2.5802	Gad1b-GFP	1.7831	Anti-TH	1.6383	Elavl3-GCaMP5G	1.494
Rhombencephalon - Eminentia Granularis	127.503	Ptf1aGal4-uasKaede	2.6392	Anti-5HT	2.3042	Anti-Gad67	1.956	Anti-Zn1	1.8732	Otpb.A-Gal4-UAS-GCaMP_6	1.8411
Rhombencephalon - Glyt2 Cluster 3	125.969	Glyt2-GFP	2.1236	Ptf1aGal4-uasKaede	2.077	6.7FRhcrtR-Gal4-uasKaede	1.9385	Elavl3-H2BRFP	1.2334	S1181tGal4-uasKaede	1.1558
Rhombencephalon - Cerebelluar-Vglut2 enriched areas	124.66	Vglut2a-GFP	2.2748	Elavl3-H2BRFP	1.1461	Elavl3-GCaMP5G	1.0225	EtVmat2-GFP	0.98493	Oxtl-GFP	0.98168
Diencephalon - Isl1 cluster 2	122.581	Elavl3-H2BRFP	2.3473	Gad1b-GFP	1.8469	Oxtl-GFP	1.4173	Isl1-GFP	1.0245	Glyt2-GFP	0.8997
Telencephalon - Telencephalic Migrated Area 4 (M4)	119.578	Anti-Zn1	2.9402	Anti-Zrf2	2.7763	Anti-5HT	2.2726	Anti-tERK	1.8713	Anti-Zn12(Hnk-1)	1.5872
Diencephalon - Olig2 Band	115.573	Olig2-GFP	2.0428	Oxtl-GFP	0.95311	Elavl3-H2BRFP	0.93453	Gad1b-GFP	0.8843	Vglut2a-GFP	0.87622
Rhombencephalon - Neuropil Region 2	115.533	Anti-Znp1(Synaptotagmin2)	4.9731	Anti-GlyR	4.9337	Anti-Zrf2	3.5796	Isl2bGal4-uasDendra	3.5219	Elavl3-GCaMP5G	2.7727
Diencephalon -	115.06	Vglut2a-GFP	1.3761	Elavl3-H2BRFP	1.3459	Qrfp-GFP	1.2705	Oxtl-GFP	1.1917	Anti-tERK	1.181
Diencephalon - Medial vglut2 cluster	114.207	Vglut2a-GFP	1.6479	Elavl3-H2BRFP	1.2484	Olig2-GFP	0.97729	Oxtl-GFP	0.94424	Hcrt-RFP	0.91259
Rhombencephalon - Gad1b Cluster 13	112.079	Gad1b-GFP	2.5375	6.7FRhcrtR-Gal4-uasKaede	2.4871	Anti-Znp1(Synaptotagmin2)	2.2075	Anti-Zn1	1.917	Anti-Gad67	1.8643
Diencephalon - Pretectal dopaminergic cluster	109.565	EtVmat2-GFP	2.0643	Elavl3-H2BRFP	1.4709	Gad1b-GFP	1.4031	Anti-TH	1.3041	Qrfp-GFP	0.98257
Diencephalon - Dopaminergic Cluster 6 - hypothalamus	109.55	Anti-Zrf1(GFAP)	1.3837	Anti-TH	1.2868	Vglut2a-GFP	1.1306	Elavl3-H2BRFP	1.0858	Gad1b-GFP	0.95989
Diencephalon - Hypothalamus - Intermediate Hypothalamus Neural Cluster	107.852	EtVmat2-GFP	1.4828	Gad1b-GFP	1.0957	Anti-Zn1	1.0649	Anti-Zrf2	1.04	Oxtl-GFP	0.9959
Diencephalon - Pretectal Gad1b Cluster	105.594	EtVmat2-GFP	2.3866	Gad1b-GFP	2.2859	Elavl3-H2BRFP	1.2741	Anti-TH	1.2205	Elavl3-GCaMP5G	1.159
Diencephalon - Postoptic Commissure	104.825	Qrfp-GFP	2.381	Anti-Zrf2	2.0313	Anti-tERK	1.7511	Anti-5HT	1.6783	Anti-TH	1.487
Rhombencephalon - Raphe - Inferior	103.594	EtVmat2-GFP	3.6134	Pet1-GFP	3.5555	Elavl3-H2BRFP	1.7534	Olig2-GFP	1.4584	Elavl3-GCaMP5G	1.3221
Rhombencephalon - Small cluster of TH stained neurons	102.544	EtVmat2-GFP	1.3327	Elavl3-H2BRFP	1.248	Glyt2-GFP	1.1519	Gad1b-GFP	1.1391	Vglut2a-GFP	0.99096
Rhombencephalon - Gad1b Cluster 7	102.303	Ptf1aGal4-uasKaede	2.6626	Anti-5HT	2.3513	Anti-Gad67	2.216	Anti-Zn1	1.9156	Otpb.A-Gal4-UAS-GCaMP_6	1.8874
Diencephalon - Hypothalamus Vglut2 Cluster 4	102.094	Vglut2a-GFP	1.8741	Elavl3-H2BRFP	1.3087	Gad1b-GFP	1.1527	Anti-TH	1.1436	Anti-tERK	1.1358
Diencephalon - Eminentia Thalami	102.018	Vglut2a-GFP	3.386	Oxtl-GFP	2.301	Elavl3-H2BRFP	1.3144	Anti-GlyR	1.2707	Olig2-GFP	1.1797
Diencephalon - Anterior pretectum cluster of vmat2 Neurons	100.926	EtVmat2-GFP	2.3299	Elavl3-H2BRFP	1.5163	Gad1b-GFP	1.3871	Elavl3-GCaMP5G	1.0363	Anti-TH	1.0307
Rhombencephalon - Qrfp neuron cluster sparse	100.153	Vglut2a-GFP	4.867	Elavl3-H2BRFP	2.4159	Anti-5HT	1.4672	Qrfp-GFP	1.3192	Elavl3-GCaMP5G	1.2557
Diencephalon - Rostral Hypothalamus	99.09	Qrfp-GFP	3.2368	Elavl3-H2BRFP	2.39	Hcrt-RFP	2.1271	Anti-tERK	1.3156	S1181tGal4-uasKaede	1.1475
Diencephalon - Hypothalamus Hcrt Neurons	98.9656	Hcrt-RFP	6.4407	Qrfp-GFP	5.2147	Elavl3-H2BRFP	2.3808	S1181tGal4-uasKaede	2.1047	EtVmat2-GFP	1.4221
Rhombencephalon - Interpeduncular Nucleus	93.6261	Anti-Zrf1(GFAP)	2.2634	Gad1b-GFP	1.2182	Vglut2a-GFP	1.1607	Elavl3-H2BRFP	1.03	Oxtl-GFP	0.92292
Rhombencephalon - Glyt2 Cluster 13	93.0679	Anti-Znp1(Synaptotagmin2)	3.5193	Anti-GlyR	2.8116	Anti-Gad67	2.7853	Anti-Zn1	2.6434	Glyt2-GFP	2.4471
Telencephalon - Subpallial Otpb strip	89.489	Vglut2a-GFP	1.4351	Oxtl-GFP	1.0854	Anti-GlyR	0.96855	Elavl3-H2BRFP	0.85229	Otpb.A-Nsfb-GFP	0.84294
Diencephalon - Posterior Tuberculum	85.938	Qrfp-GFP	2.4138	Elavl3-H2BRFP	1.8812	Hcrt-RFP	1.6187	6.7FRhcrtR-Gal4-uasKaede	1.1515	Oxtl-GFP	1.1006
Rhombencephalon - Ventrolateral population of serotonergic neurons	85.4152	Anti-GlyR	1.757	EtVmat2-GFP	1.476	Pet1-GFP	1.3995	Anti-5HT	1.3932	Anti-Zrf2	1.2951
Diencephalon - Dopaminergic Cluster 1 - ventral thalamic and periventricular posterior tubercular DA neurons	84.5928	Oxtl-GFP	2.4885	Elavl3-H2BRFP	2.2306	Gad1b-GFP	1.5436	Qrfp-GFP	1.2855	Hcrt-RFP	1.0272
Mesencephalon - Vmat2 cluster of paraventricular organ	84.028	EtVmat2-GFP	1.993	Anti-5HT	1.4032	Olig2-GFP	1.0247	Oxtl-GFP	1.0126	Glyt2-GFP	0.96069
Rhombencephalon - Neuropil Region 4	82.3542	Anti-Znp1(Synaptotagmin2)	4.5189	Anti-Gad67	3.7759	Anti-GlyR	3.577	Anti-Zn1	3.1889	Anti-Zrf2	2.7868
Rhombencephalon - Raphe - Superior	81.8384	Anti-Zrf1(GFAP)	3.0875	Pet1-GFP	2.4828	EtVmat2-GFP	2.48	Elavl3-H2BRFP	1.1087	Anti-TH	1.0365
Diencephalon - Hypothalamus Olig2 cluster	81.811	Elavl3-H2BRFP	3.0428	Olig2-GFP	2.3747	Vglut2a-GFP	1.9931	Isl1-GFP	1.7863	Anti-5HT	1.7666
Mesencephalon -	81.4607	Isl2bGal4-uasDendra	12.1984	Elavl3-GCaMP5G	4.403	Gad1b-GFP	4.1841	Anti-Znp1(Synaptotagmin2)	3.9596	Anti-Zrf2	3.478
Rhombencephalon - Glyt2 Cluster 11	80.1783	6.7FRhcrtR-Gal4-uasKaede	3.056	Gad1b-GFP	2.0573	Glyt2-GFP	1.5795	Elavl3-H2BRFP	1.3707	Anti-Zn1	1.3415
Diencephalon - Olig2 Band 2	76.3447	Olig2-GFP	1.5937	Gad1b-GFP	1.1018	Oxtl-GFP	0.99549	Vglut2a-GFP	0.89851	Qrfp-GFP	0.89406
Diencephalon - Intermediate Hypothalamus	75.4396	Anti-tERK	1.8959	Elavl3-GCaMP5G	1.6486	Anti-Zn1	1.6292	Anti-Zrf2	1.6278	Vglut2a-GFP	1.5817
Ganglia - Lateral Line Neuromast N	74.879	Anti-GlyR	NaN	Ptf1aGal4-uasKaede	2.7369	Olig2-GFP	2.646	Pet1-GFP	2.5421	Isl1-GFP	2.537
Rhombencephalon - 6.7FDhcrtR-Gal4 Cluster 4	73.7089	6.7FRhcrtR-Gal4-uasKaede	2.7083	Anti-Znp1(Synaptotagmin2)	2.4415	Gad1b-GFP	2.3646	Anti-Gad67	2.0853	Anti-Zn1	1.7719
Mesencephalon - Torus Semicircularis	73.2146	Anti-5HT	2.0291	Elavl3-H2BRFP	1.956	Vglut2a-GFP	1.8471	Anti-Znp1(Synaptotagmin2)	1.8282	Gad1b-GFP	1.7856
Telencephalon - Postoptic Commissure	71.5697	Anti-Zrf2	3.1769	Anti-5HT	2.2822	Anti-tERK	2.2122	Qrfp-GFP	2.0823	Anti-Zn1	1.8771
Rhombencephalon - Tangential Vestibular Nucleus	69.9007	6.7FRhcrtR-Gal4-uasKaede	6.0384	Anti-Znp1(Synaptotagmin2)	1.9647	Anti-GlyR	1.9245	Anti-Zn1	1.7485	Anti-Gad67	1.3761
Diencephalon - Hypothamic VentroLateral VMAT cluster	69.6613	Elavl3-H2BRFP	2.824	EtVmat2-GFP	1.5413	Vglut2a-GFP	1.5166	Anti-Zrf1(GFAP)	1.4749	Isl1-GFP	1.4688
Diencephalon - Dopaminergic Cluster 7 - Caudal Hypothalamus	69.0422	Anti-TH	1.3489	EtVmat2-GFP	1.276	Anti-Zrf2	1.2697	Anti-GlyR	1.2158	Anti-tERK	1.1221
Diencephalon - Pineal	68.3744	Anti-TH	5.3644	Glyt2-GFP	4.5236	EtVmat2-GFP	3.5167	S1181tGal4-uasKaede	3.2594	Anti-5HT	3.181
Diencephalon - Dorsal Thalamus	68.2162	Elavl3-H2BRFP	1.1369	Vglut2a-GFP	0.99949	Elavl3-GCaMP5G	0.96798	Oxtl-GFP	0.95566	EtVmat2-GFP	0.90593
Diencephalon - Hypothalamus Vglut2 Cluster 1	67.3829	Vglut2a-GFP	1.8095	Elavl3-H2BRFP	1.1217	Oxtl-GFP	0.99134	Glyt2-GFP	0.96011	Olig2-GFP	0.92969
Diencephalon - Hypothalamus Vglut2 Cluster 6	67.3775	Elavl3-H2BRFP	2.8772	Anti-5HT	2.1842	Anti-tERK	2.0197	Vglut2a-GFP	1.8988	Anti-Zn1	1.7423
Diencephalon - Oxtl Cluster 4 - sparse in hypothalamus	67.1453	EtVmat2-GFP	1.2247	Oxtl-GFP	1.2212	Vglut2a-GFP	1.1159	Elavl3-H2BRFP	1.1136	Anti-Zrf2	1.0328
Rhombencephalon - RoL2	66.1429	Anti-Zrf2	2.0054	SpinalBackfills	1.8761	Anti-Znp1(Synaptotagmin2)	1.5454	S1181tGal4-uasKaede	1.4462	Anti-GlyR	1.422
Rhombencephalon - Cerebellar Neuropil 1	65.7209	Anti-Zrf2	4.3031	Anti-GlyR	2.6237	EtVmat2-GFP	2.4144	Anti-Znp1(Synaptotagmin2)	1.8991	Vglut2a-GFP	1.8032
Diencephalon - Dopaminergic Cluster 2 - posterior tuberculum	65.3543	Qrfp-GFP	3.2925	Hcrt-RFP	2.5558	Elavl3-H2BRFP	2.1066	Anti-TH	1.8452	S1181tGal4-uasKaede	1.7556
Diencephalon - Pineal Vmat2 cluster	63.9113	EtVmat2-GFP	5.2212	Glyt2-GFP	5.1531	Anti-TH	4.8859	Anti-5HT	3.373	S1181tGal4-uasKaede	3.3581
Diencephalon - Ventral Thalamus	63.7128	Gad1b-GFP	2.4145	Elavl3-H2BRFP	1.2917	Oxtl-GFP	0.92509	Elavl3-GCaMP5G	0.87917	Olig2-GFP	0.86938
Rhombencephalon - Gad1b Cluster 3	63.1526	EtVmat2-GFP	2.2719	Pet1-GFP	1.8345	Gad1b-GFP	1.3683	Anti-TH	1.0401	Anti-tERK	0.97274
Diencephalon - Hypothalamus Gad1b Cluster 1	61.964	Gad1b-GFP	1.7703	Elavl3-GCaMP5G	1.4343	Anti-Zrf2	1.3628	Anti-Zn1	1.3382	Anti-5HT	1.2974
Ganglia - Trigeminal Ganglion	61.6151	Elavl3-H2BRFP	3.6955	Isl2bGal4-uasDendra	1.9349	Anti-Zn12(Hnk-1)	1.9048	Anti-TH	1.6998	Isl1-GFP	1.5683
Diencephalon - Otpb Cluster 1	61.5272	Anti-TH	2.5219	EtVmat2-GFP	1.5296	Otpb.A-Nsfb-GFP	1.5237	Hcrt-RFP	1.3898	Anti-Zrf2	1.3666
Diencephalon - Migrated Posterior Tubercular Area (M2)	60.9802	Vglut2a-GFP	1.4105	Gad1b-GFP	1.3593	Anti-Zrf2	1.2298	Anti-Zn1	1.2139	Elavl3-H2BRFP	1.2089
Diencephalon - Hypothalamus Vglut2 Cluster 2	60.737	Vglut2a-GFP	2.509	Anti-5HT	1.535	Elavl3-H2BRFP	1.5305	Gad1b-GFP	1.4675	Anti-Zn1	1.337
Diencephalon - Pituitary	59.9657	Anti-Zrf1(GFAP)	1.3952	Vglut2a-GFP	1.3639	Oxtl-GFP	1.098	Anti-TH	1.0876	Olig2-GFP	1.0627
Ganglia - Vagal Ganglia	59.2272	Elavl3-H2BRFP	8.1046	Isl1-GFP	2.8081	Anti-5HT	2.504	Pet1-GFP	2.45	Otpb.A-Gal4-UAS-GCaMP_6	2.1476
Diencephalon - Dopaminergic Cluster 4/5 - posterior tuberculum and hypothalamus	58.8855	Anti-TH	2.1044	EtVmat2-GFP	1.3504	Otpb.A-Nsfb-GFP	1.2688	Elavl3-H2BRFP	1.2158	Vglut2a-GFP	1.0694
Ganglia - Lateral Line Neuromast SO1	58.834	Olig2-GFP	2.7426	Pet1-GFP	2.3263	6.7FRhcrtR-Gal4-uasKaede	2.2346	Anti-Zrf1(GFAP)	2.1716	Isl1-GFP	2.1502
Diencephalon - Retinal Arborization Field 5 (AF5)	58.5303	Isl2bGal4-uasDendra	4.5859	Anti-Gad67	3.2634	Anti-Zrf2	3.2408	Anti-Znp1(Synaptotagmin2)	3.176	Anti-Zn1	3.1236
Rhombencephalon - Glyt2 Cluster 14	57.7747	S1181tGal4-uasKaede	2.7028	SpinalBackfills	2.3666	Anti-GlyR	2.3626	Glyt2-GFP	2.0387	Ptf1aGal4-uasKaede	1.9048
Diencephalon - Hypothalamus Olig2 cluster 2	57.3937	Vglut2a-GFP	1.8074	Anti-Zrf1(GFAP)	1.3357	Olig2-GFP	1.2926	Gad1b-GFP	1.0852	Oxtl-GFP	0.96921
Diencephalon - Retinal Arborization Field 1 (AF1- Approximate Location)	57.3652	Isl2bGal4-uasDendra	3.5647	Anti-Zrf2	2.7473	Anti-Zn1	2.08	Anti-5HT	1.995	Anti-tERK	1.7299
Mesencephalon - Retinal Arborization Field 8 (AF8)	54.109	EtVmat2-GFP	2.7629	Anti-Zrf2	2.5566	Isl2bGal4-uasDendra	2.2715	Anti-TH	1.817	Anti-Zrf1(GFAP)	1.7615
Diencephalon - Torus Lateralis	53.8913	Elavl3-H2BRFP	2.6106	Vglut2a-GFP	1.9769	Anti-5HT	1.9643	Anti-tERK	1.7225	S1181tGal4-uasKaede	1.7057
Ganglia - Anterior Lateral Line Ganglion	53.5674	Elavl3-H2BRFP	3.121	Anti-Zn12(Hnk-1)	1.8878	Isl2bGal4-uasDendra	1.6772	Anti-TH	1.4658	Elavl3-GCaMP5G	1.3269
Diencephalon - Hypothalamus Gad1b Cluster 2	53.4596	Qrfp-GFP	2.599	Anti-Zrf2	2.5251	Anti-tERK	2.1376	Anti-5HT	1.709	Anti-Znp1(Synaptotagmin2)	1.632
Mesencephalon - Tectum Stratum Periventriculare	52.7738	Elavl3-H2BRFP	3.3245	Elavl3-GCaMP5G	2.4177	Gad1b-GFP	2.2026	Vglut2a-GFP	2.1741	Anti-5HT	1.3985
Ganglia - Facial Sensory Ganglion	51.0743	Elavl3-H2BRFP	2.7634	Isl1-GFP	1.8805	Vglut2a-GFP	1.5786	S1181tGal4-uasKaede	1.5082	Isl2bGal4-uasDendra	1.3996
Diencephalon - Oxtl Cluster 2	51.0333	Isl2bGal4-uasDendra	3.8446	Elavl3-H2BRFP	2.1682	Oxtl-GFP	1.5224	Anti-Zrf1(GFAP)	1.463	Olig2-GFP	1.4263
Ganglia - Lateral Line Neuromast SO2	50.975	Otpb.A-Gal4-UAS-GCaMP_6	2.8551	Anti-Zrf1(GFAP)	2.8512	Isl1-GFP	2.8443	Olig2-GFP	2.7499	Pet1-GFP	2.7464
Mesencephalon - Retinal Arborization Field 7 (AF7)	50.7448	Isl2bGal4-uasDendra	5.6825	Anti-GlyR	4.82	Anti-Znp1(Synaptotagmin2)	4.5767	Elavl3-GCaMP5G	3.1343	Anti-Zn1	2.8744
Rhombencephalon - Spinal Backfill Vestibular Population	50.2677	SpinalBackfills	4.3602	Anti-GlyR	2.9189	S1181tGal4-uasKaede	2.2618	Anti-Znp1(Synaptotagmin2)	1.994	Anti-Zn1	1.8998
Diencephalon - Migrated Area of the Pretectum (M1)	49.8527	Isl2bGal4-uasDendra	2.0536	Anti-Zrf2	1.9359	Anti-Znp1(Synaptotagmin2)	1.9297	Anti-Gad67	1.6027	Anti-Zrf1(GFAP)	1.5718
Ganglia - Lateral Line Neuromast SO3	49.6271	Anti-Zrf1(GFAP)	4.4119	Olig2-GFP	2.7546	Isl1-GFP	2.7371	Anti-Zn12(Hnk-1)	2.7243	6.7FRhcrtR-Gal4-uasKaede	2.4982
Mesencephalon - Medial Tectal Band	49.2009	Gad1b-GFP	2.0858	Elavl3-H2BRFP	1.3371	Anti-tERK	0.95872	Oxtl-GFP	0.94723	Qrfp-GFP	0.88759
Diencephalon - Hypothalamus Gad1b Cluster 3 Sparse	47.9251	Anti-tERK	2.0571	Elavl3-H2BRFP	2.0564	Anti-Zrf2	1.8928	Isl2bGal4-uasDendra	1.8912	Anti-5HT	1.8426
Diencephalon - Hypothalamus 6.7FRhcrtR-Gal4 cluster 1	46.561	6.7FRhcrtR-Gal4-uasKaede	3.5823	Elavl3-H2BRFP	2.4717	Qrfp-GFP	1.5796	Hcrt-RFP	1.1886	Gad1b-GFP	1.0926
Diencephalon - Oxtl Cluster 5	45.1409	Oxtl-GFP	1.45	Elavl3-H2BRFP	1.4096	EtVmat2-GFP	1.2161	Vglut2a-GFP	1.1246	Glyt2-GFP	0.9535
Diencephalon - Diffuse Nucleus of the Intermediate Hypothalamus	44.4217	Elavl3-H2BRFP	2.0747	Anti-5HT	2.0086	Anti-tERK	1.7977	Vglut2a-GFP	1.7766	Elavl3-GCaMP5G	1.5715
Diencephalon - Retinal Arborization Field 6 (AF6)	43.7023	Isl2bGal4-uasDendra	8.8959	Anti-Znp1(Synaptotagmin2)	5.2718	Anti-Gad67	3.0613	Anti-Zn1	2.9269	Anti-Zrf2	2.1791
Ganglia - Lateral Line Neuromast D1	43.2862	Olig2-GFP	3.4312	Pet1-GFP	3.4048	Otpb.A-Gal4-UAS-GCaMP_6	3.1678	Anti-Zrf1(GFAP)	3.1483	Anti-Zn12(Hnk-1)	3.0389
Diencephalon - Isl1 cluster 3	41.3615	Elavl3-H2BRFP	2.0936	Qrfp-GFP	1.4768	Gad1b-GFP	1.3579	6.7FRhcrtR-Gal4-uasKaede	1.2745	Anti-TH	1.2251
Mesencephalon - Tecum Neuropil	40.8609	Isl2bGal4-uasDendra	16.6038	Anti-Znp1(Synaptotagmin2)	9.3152	Anti-Zrf2	5.6777	Anti-Gad67	5.1212	Anti-GlyR	4.9539
Ganglia - Lateral Line Neuromast OC1	40.3043	Anti-Zrf1(GFAP)	3.3968	Anti-TH	2.3013	Pet1-GFP	2.1711	Otpb.A-Gal4-UAS-GCaMP_6	2.0446	Anti-Zn12(Hnk-1)	1.9909
Diencephalon - Hypothalamus Vglut2 Cluster 3	40.3033	Vglut2a-GFP	2.2334	Anti-5HT	2.1092	Anti-tERK	2.0961	Elavl3-H2BRFP	2.0818	Elavl3-GCaMP5G	1.8724
Ganglia - Posterior Lateral Line Ganglia	40.0382	Elavl3-H2BRFP	5.8733	Anti-Zn12(Hnk-1)	3.5748	Pet1-GFP	3.4018	Olig2-GFP	2.6816	Otpb.A-Gal4-UAS-GCaMP_6	2.6687
Diencephalon - Retinal Arborization Field 3 (AF3)	39.6655	Isl2bGal4-uasDendra	4.3942	Anti-Zrf2	2.5172	Anti-Gad67	2.1555	Anti-Znp1(Synaptotagmin2)	2.074	Anti-GlyR	2.0146
Rhombencephalon - Vglut2 cluster 4	38.6864	EtVmat2-GFP	2.4438	Elavl3-H2BRFP	1.7425	Pet1-GFP	1.6906	Vglut2a-GFP	1.3286	SpinalBackfills	1.2617
Rhombencephalon - Valvula Cerebelli	37.3666	Ptf1aGal4-uasKaede	1.8254	Anti-Znp1(Synaptotagmin2)	1.3098	Vglut2a-GFP	1.181	Olig2-GFP	1.1263	SpinalBackfills	1.0478
Diencephalon - Retinal Arborization Field 4 (AF4)	37.2966	Isl2bGal4-uasDendra	2.9206	Anti-Zrf2	2.1365	Anti-GlyR	2.108	Anti-Gad67	1.9121	Anti-Znp1(Synaptotagmin2)	1.7895
Ganglia - Lateral Line Neuromast O1	36.9264	Pet1-GFP	5.3695	Otpb.A-Gal4-UAS-GCaMP_6	5.1736	Olig2-GFP	4.2809	Anti-Zn12(Hnk-1)	4.1273	Anti-Zrf1(GFAP)	4.0745
Rhombencephalon - Gad1b Cluster 19	36.0781	Anti-GlyR	3.0431	S1181tGal4-uasKaede	2.9194	SpinalBackfills	2.5475	Anti-Znp1(Synaptotagmin2)	2.3931	Ptf1aGal4-uasKaede	2.1073
Spinal Cord - Vmat2 Stripe1	35.2856	Elavl3-H2BRFP	2.8629	6.7FRhcrtR-Gal4-uasKaede	2.6303	Gad1b-GFP	2.0002	Anti-GlyR	1.4274	EtVmat2-GFP	1.3506
Diencephalon - Hypothalamus Qrfp neuron cluster	34.8123	Qrfp-GFP	12.7579	Hcrt-RFP	3.4249	Elavl3-H2BRFP	2.6933	S1181tGal4-uasKaede	1.9151	Anti-tERK	1.371
Diencephalon - Retinal Arborization Field 2 (AF2- Approximate Location)	33.9453	Isl2bGal4-uasDendra	11.8554	Anti-Zn1	2.4947	Anti-Zrf2	2.3395	Anti-tERK	1.9376	Anti-5HT	1.926
Diencephalon - Otpb Cluster 4	33.0742	Qrfp-GFP	2.7973	Elavl3-H2BRFP	2.7502	Otpb.A-Gal4-UAS-GCaMP_6	1.7119	Hcrt-RFP	1.5677	S1181tGal4-uasKaede	1.5378
Diencephalon - Hypothalamus s1181t Cluster	31.298	Qrfp-GFP	10.5522	Hcrt-RFP	5.3431	S1181tGal4-uasKaede	3.0846	Elavl3-H2BRFP	2.5303	Anti-Zrf2	1.4533
Mesencephalon - Vmat2 cluster2	27.4023	Elavl3-H2BRFP	1.663	Gad1b-GFP	1.6148	Qrfp-GFP	1.2243	EtVmat2-GFP	1.0827	Olig2-GFP	1.0632
Ganglia - Facial glossopharyngeal ganglion	26.4176	Elavl3-H2BRFP	1.9623	Elavl3-GCaMP5G	1.0547	Oxtl-GFP	0.99777	Gad1b-GFP	0.99407	Isl2bGal4-uasDendra	0.97571
Rhombencephalon - Noradrendergic neurons of the Interfascicular and Vagal areas	12.0666	Vglut2a-GFP	2.5608	EtVmat2-GFP	2.0873	Anti-5HT	2.0596	Elavl3-H2BRFP	2.0074	Anti-Zrf1(GFAP)	1.787
Rhombencephalon - Glyt2 Cluster 10	11.1961	Anti-GlyR	1.6182	Elavl3-H2BRFP	1.5303	Glyt2-GFP	1.3345	Anti-Znp1(Synaptotagmin2)	1.3026	Anti-TH	1.3004
Spinal Cord - Glyt2 Stripe	2.1037	Elavl3-H2BRFP	2.8821	6.7FRhcrtR-Gal4-uasKaede	2.1202	Gad1b-GFP	2.1146	Anti-GlyR	1.8315	Elavl3-GCaMP5G	1.7275
Spinal Cord - Neurons with descending projections labelled by spinal backfills	1.7391	Elavl3-H2BRFP	3.5811	Anti-GlyR	1.6853	Vglut2a-GFP	1.685	Anti-Zn1	1.6289	Anti-tERK	1.2809

## Sheet: Z-BrainQuant_BlueTuning
ROI name	Signal in ROI	Top Label	Signal	2nd Label	Signal	3rd Label	Signal	4th Label	Signal	5th Label	Signal
Mesencephalon - Otpb Cluster	7804.92	Isl1-GFP	2.1151	Otpb.A-Nsfb-GFP	1.7174	Anti-GlyR	1.1988	Elavl3-H2BRFP	1.1699	EtVmat2-GFP	1.1268
Telencephalon - Subpallial Vglut2 Cluster	5032.28	Vglut2a-GFP	3.6871	Elavl3-H2BRFP	3.1292	Anti-5HT	2.4917	Anti-tERK	2.1996	Gad1b-GFP	1.8869
Telencephalon - S1181t Cluster	4786.31	Gad1b-GFP	2.2406	Elavl3-H2BRFP	1.7585	Elavl3-GCaMP5G	1.2079	Anti-5HT	1.073	Isl1-GFP	1.0724
Telencephalon - Subpallial Otpb Cluster 2	4646.29	Gad1b-GFP	2.5315	Elavl3-H2BRFP	1.7288	Elavl3-GCaMP5G	1.3525	Isl1-GFP	1.2653	Anti-5HT	1.1848
Telencephalon - Isl1 cluster 1	4196.14	Gad1b-GFP	3.1945	Isl1-GFP	2.2686	Elavl3-H2BRFP	2.0131	Elavl3-GCaMP5G	1.9514	Anti-5HT	1.478
Telencephalon - Vmat2 cluster	4091.43	EtVmat2-GFP	3.0107	Gad1b-GFP	1.941	Elavl3-H2BRFP	1.7302	Anti-Zn1	1.1717	Anti-5HT	1.142
Mesencephalon - Oculomotor Nucleus nIII	3692.65	Isl1-GFP	2.0017	Anti-Zrf1(GFAP)	1.8166	SpinalBackfills	1.6534	6.7FRhcrtR-Gal4-uasKaede	1.5408	Anti-Znp1(Synaptotagmin2)	1.537
Telencephalon - Subpallium	3661.9	Gad1b-GFP	3.6625	Elavl3-H2BRFP	1.9613	EtVmat2-GFP	1.8791	Anti-5HT	1.6558	Elavl3-GCaMP5G	1.579
Mesencephalon - Oxtl Cluster Sparse	3657.27	Anti-Zrf1(GFAP)	1.6663	Elavl3-H2BRFP	1.4339	Oxtl-GFP	1.064	Elavl3-GCaMP5G	0.98481	Qrfp-GFP	0.95219
Mesencephalon - NucMLF (nucleus of the medial longitudinal fascicle)	3515.45	SpinalBackfills	4.7689	Anti-Znp1(Synaptotagmin2)	2.4433	6.7FRhcrtR-Gal4-uasKaede	2.3999	Anti-GlyR	1.9488	Anti-Zn1	1.3851
Telencephalon - Subpallial dopaminergic cluster	3439.67	EtVmat2-GFP	2.2145	Gad1b-GFP	1.8601	Elavl3-H2BRFP	1.6448	Anti-5HT	0.98894	Anti-TH	0.96718
Diencephalon - Left Habenula Vglut2 Cluster	3413.4	Vglut2a-GFP	4.824	Elavl3-H2BRFP	1.799	Anti-Zrf1(GFAP)	1.6907	Elavl3-GCaMP5G	1.3794	Anti-5HT	1.3237
Telencephalon - Subpallial Gad1b cluster	3373.66	Gad1b-GFP	4.0133	EtVmat2-GFP	1.9406	Elavl3-H2BRFP	1.7791	Elavl3-GCaMP5G	1.4363	Anti-5HT	1.3971
Mesencephalon - Sparse 6.7FRhcrtR cluster	3269.73	6.7FRhcrtR-Gal4-uasKaede	1.5942	Anti-GlyR	1.5394	Anti-Znp1(Synaptotagmin2)	1.4848	Elavl3-H2BRFP	1.3158	Qrfp-GFP	1.1903
Diencephalon - Right Habenula Vglut2 Cluster	3156.89	Vglut2a-GFP	5.2977	Anti-Zrf1(GFAP)	1.8092	Anti-Zn12(Hnk-1)	1.6497	Elavl3-H2BRFP	1.639	Anti-5HT	1.377
Rhombencephalon - Gad1b Cluster 2	3106.28	Gad1b-GFP	1.3336	Elavl3-H2BRFP	1.0104	Oxtl-GFP	0.98548	Qrfp-GFP	0.87282	Hcrt-RFP	0.85916
Diencephalon - Habenula	2829.99	Vglut2a-GFP	4.9368	Anti-Zrf1(GFAP)	2.1742	Elavl3-H2BRFP	2.0442	Anti-Zn12(Hnk-1)	1.7126	Anti-5HT	1.6181
Rhombencephalon - 6.7FDhcrtR-Gal4 Stripe 1	2806.09	Gad1b-GFP	3.15	6.7FRhcrtR-Gal4-uasKaede	1.8418	Elavl3-H2BRFP	1.6947	Elavl3-GCaMP5G	1.2087	Anti-5HT	1.174
Mesencephalon - Vglut2 cluster 1	2698.86	Vglut2a-GFP	2.2673	SpinalBackfills	1.1076	Elavl3-H2BRFP	0.98179	Oxtl-GFP	0.96625	Hcrt-RFP	0.95355
Mesencephalon - Torus Longitudinalis	2660.61	Anti-Zrf1(GFAP)	2.1381	Elavl3-H2BRFP	2.0011	Anti-Zrf2	1.8192	Elavl3-GCaMP5G	1.8138	S1181tGal4-uasKaede	1.7531
Telencephalon -	2641.39	Anti-tERK	4.9454	Anti-5HT	4.38	Anti-Zrf2	4.3057	Anti-Zn1	3.4156	Elavl3-GCaMP5G	3.3479
Rhombencephalon - Otpb Cluster 6	2640.7	Elavl3-H2BRFP	1.6187	6.7FRhcrtR-Gal4-uasKaede	1.5418	SpinalBackfills	1.1767	Elavl3-GCaMP5G	0.99355	Gad1b-GFP	0.97587
Diencephalon - Preoptic area Vglut2 cluster	2577.8	Anti-Zrf2	3.3698	Anti-5HT	2.7092	Anti-tERK	2.5479	Elavl3-H2BRFP	2.4971	Otpb.A-Gal4-UAS-GCaMP_6	2.4409
Rhombencephalon - Oculomotor Nucleus nIV	2554.79	Isl1-GFP	2.6855	6.7FRhcrtR-Gal4-uasKaede	1.8741	Anti-Znp1(Synaptotagmin2)	1.8426	Anti-Zn1	1.2148	Anti-GlyR	1.1348
Rhombencephalon - Glyt2 Stripe 1	2505.58	Gad1b-GFP	2.6283	Elavl3-GCaMP5G	1.5694	Elavl3-H2BRFP	1.4253	Ptf1aGal4-uasKaede	1.2435	Glyt2-GFP	1.1778
Diencephalon - Otpb Cluster 3	2440.22	Vglut2a-GFP	2.0189	Otpb.A-Nsfb-GFP	1.8995	Elavl3-H2BRFP	1.7503	Anti-GlyR	1.4971	Anti-Zrf2	1.4792
Telencephalon - Olfactory Bulb	2431.96	Vglut2a-GFP	5.2844	Elavl3-H2BRFP	3.0814	Anti-Zrf1(GFAP)	2.991	Elavl3-GCaMP5G	2.9292	Anti-Zn12(Hnk-1)	2.7056
Mesencephalon - Tegmentum	2419.04	Elavl3-H2BRFP	1.1955	Elavl3-GCaMP5G	1.1068	Gad1b-GFP	1.0973	SpinalBackfills	1.0954	Anti-Zrf1(GFAP)	1.0666
Rhombencephalon - Vglut2 Stripe 3	2404.83	Elavl3-H2BRFP	1.4349	Glyt2-GFP	1.1137	Anti-Zn1	0.97899	Oxtl-GFP	0.94775	Anti-tERK	0.91348
Mesencephalon - Ptf1a Cluster	2352.86	Ptf1aGal4-uasKaede	1.9391	Elavl3-GCaMP5G	1.2024	Vglut2a-GFP	1.1479	EtVmat2-GFP	1.0773	Anti-Zrf1(GFAP)	0.97853
Telencephalon - Pallium	2335.53	Anti-tERK	3.989	Vglut2a-GFP	3.425	Anti-5HT	3.2824	Anti-Zrf2	3.2081	Anti-Zn1	2.7192
Diencephalon - Anterior group of the posterior tubercular vmat2 neurons	2328.65	Hcrt-RFP	3.7243	EtVmat2-GFP	2.4209	Oxtl-GFP	2.3483	Elavl3-H2BRFP	2.135	Qrfp-GFP	1.175
Telencephalon - Olfactory bulb dopaminergic neuron areas	2325.42	Gad1b-GFP	3.5749	EtVmat2-GFP	2.7547	Anti-tERK	1.7143	Anti-Zn12(Hnk-1)	1.6359	Anti-5HT	1.6139
Telencephalon - Isl1 cluster 2	2255.34	Gad1b-GFP	1.7649	Elavl3-H2BRFP	1.6557	Isl1-GFP	1.4527	Anti-Zrf2	1.2532	Anti-tERK	1.1593
Rhombencephalon - Otpb Cluster 2 - locus coeruleus	2159.62	EtVmat2-GFP	2.936	Otpb.A-Nsfb-GFP	2.8126	Anti-TH	2.1396	Elavl3-H2BRFP	1.771	Hcrt-RFP	1.3617
Rhombencephalon - Lobus caudalis cerebelli	2106.28	Anti-Zn1	1.8645	Isl1-GFP	1.6166	Otpb.A-Gal4-UAS-GCaMP_6	1.5663	Ptf1aGal4-uasKaede	1.5619	Pet1-GFP	1.5591
Diencephalon - Pretectal dopaminergic cluster	2102.88	EtVmat2-GFP	2.0453	Elavl3-H2BRFP	1.4659	Gad1b-GFP	1.4073	Anti-TH	1.3123	Qrfp-GFP	0.98605
Rhombencephalon - RoL-R1	2088.52	SpinalBackfills	4.0291	Elavl3-H2BRFP	1.7094	Anti-TH	1.5676	Anti-GlyR	1.3768	6.7FRhcrtR-Gal4-uasKaede	1.3585
Rhombencephalon - Gad1b Stripe 2	2081.73	Elavl3-H2BRFP	1.5964	6.7FRhcrtR-Gal4-uasKaede	1.5822	Gad1b-GFP	1.0754	Oxtl-GFP	0.94899	Anti-tERK	0.9261
Rhombencephalon - Glyt2 Stripe 2	2055.79	Elavl3-H2BRFP	1.3843	Glyt2-GFP	1.2938	Isl1-GFP	1.0889	Gad1b-GFP	1.0326	Oxtl-GFP	0.95198
Diencephalon - Dopaminergic Cluster 3 - hypothalamus	2041.27	Hcrt-RFP	4.0907	EtVmat2-GFP	1.7089	Elavl3-H2BRFP	1.3667	Anti-5HT	1.2404	S1181tGal4-uasKaede	1.1816
Diencephalon - Pretectum	2037.71	Anti-Zrf1(GFAP)	1.7197	EtVmat2-GFP	1.562	Elavl3-H2BRFP	1.3128	Gad1b-GFP	1.2486	Qrfp-GFP	1.0173
Rhombencephalon - Gad1b Cluster 4	1991.54	Elavl3-H2BRFP	1.4017	Gad1b-GFP	1.3189	S1181tGal4-uasKaede	0.97414	Ptf1aGal4-uasKaede	0.95369	Oxtl-GFP	0.95164
Rhombencephalon - Vglut2 Stripe 2	1990.87	Gad1b-GFP	1.573	EtVmat2-GFP	1.5607	Elavl3-H2BRFP	1.3446	Glyt2-GFP	1.0823	Anti-5HT	1.0731
Rhombencephalon - VII' Facial Motor and octavolateralis efferent neurons	1970.19	Elavl3-H2BRFP	1.5774	Vglut2a-GFP	1.553	S1181tGal4-uasKaede	1.3455	Isl1-GFP	1.2607	SpinalBackfills	1.1902
Telencephalon - Vglut2 rind	1933.42	Vglut2a-GFP	4.6775	Elavl3-H2BRFP	2.4236	Anti-5HT	2.3798	Elavl3-GCaMP5G	1.8324	Otpb.A-Gal4-UAS-GCaMP_6	1.7945
Diencephalon - Pretectal Gad1b Cluster	1928.57	EtVmat2-GFP	2.3872	Gad1b-GFP	2.2835	Elavl3-H2BRFP	1.2755	Anti-TH	1.233	Elavl3-GCaMP5G	1.1597
Telencephalon - Olig2 Cluster	1915.75	Gad1b-GFP	2.4855	Olig2-GFP	1.3759	Elavl3-GCaMP5G	1.2434	Oxtl-GFP	0.94286	Qrfp-GFP	0.90908
Rhombencephalon - Ptf1a Stripe	1876.74	Gad1b-GFP	3.3652	Elavl3-GCaMP5G	1.6768	Elavl3-H2BRFP	1.6737	Ptf1aGal4-uasKaede	1.4344	Anti-5HT	1.3532
Rhombencephalon - Gad1b Stripe 1	1854.31	Gad1b-GFP	3.1399	Elavl3-H2BRFP	1.7205	Elavl3-GCaMP5G	1.5804	Anti-5HT	1.3969	EtVmat2-GFP	1.1505
Diencephalon - Anterior pretectum cluster of vmat2 Neurons	1852.99	EtVmat2-GFP	2.3148	Elavl3-H2BRFP	1.5166	Gad1b-GFP	1.383	Anti-TH	1.037	Elavl3-GCaMP5G	1.0358
Rhombencephalon - Vmat2 Stripe3	1831.66	Elavl3-H2BRFP	1.2374	EtVmat2-GFP	1.2258	Glyt2-GFP	0.97417	Oxtl-GFP	0.94965	Anti-Zn1	0.91314
Rhombencephalon - Oxtl Cluster 1 Sparse	1818.24	Gad1b-GFP	1.3541	Elavl3-H2BRFP	1.0758	Oxtl-GFP	1.0609	Qrfp-GFP	0.90312	Hcrt-RFP	0.87988
Rhombencephalon - Gad1b Cluster 1	1800.2	Gad1b-GFP	1.8529	Oxtl-GFP	0.98324	Anti-tERK	0.92719	Qrfp-GFP	0.91699	Hcrt-RFP	0.90984
Telencephalon - Anterior Commisure	1768.12	Anti-Zrf2	5.0009	Anti-tERK	3.8381	Anti-Zn1	3.0209	Anti-Gad67	2.9904	Anti-Zn12(Hnk-1)	2.7898
Diencephalon - Preoptic Otpb Cluster	1747.29	Otpb.A-Nsfb-GFP	2.7318	Anti-Zrf2	2.4994	Anti-Zn1	2.064	Anti-5HT	2.0265	Otpb.A-Gal4-UAS-GCaMP_6	1.9666
Rhombencephalon - Locus Coreuleus	1740.53	EtVmat2-GFP	2.1547	Elavl3-H2BRFP	1.759	Otpb.A-Nsfb-GFP	1.7477	Anti-TH	1.6968	Vglut2a-GFP	1.2951
Rhombencephalon - Vmat2 Stripe2	1738.58	EtVmat2-GFP	1.8576	Gad1b-GFP	1.7982	Elavl3-H2BRFP	1.362	Isl1-GFP	1.1374	Anti-5HT	1.0883
Rhombencephalon - Gad1b Cluster 17	1724.44	Gad1b-GFP	1.4523	Elavl3-H2BRFP	1.0678	EtVmat2-GFP	0.99272	Oxtl-GFP	0.97167	Anti-tERK	0.96862
Rhombencephalon - Gad1b Cluster 18	1713.25	Gad1b-GFP	2.4701	Ptf1aGal4-uasKaede	1.6956	Elavl3-H2BRFP	1.6408	S1181tGal4-uasKaede	1.2976	Anti-5HT	1.2954
Diencephalon - Oxtl Cluster 3	1678.49	Oxtl-GFP	2.6503	Elavl3-H2BRFP	2.2487	Hcrt-RFP	1.9812	Qrfp-GFP	1.705	6.7FRhcrtR-Gal4-uasKaede	1.5441
Diencephalon - Medial vglut2 cluster	1675.47	Vglut2a-GFP	1.6477	Elavl3-H2BRFP	1.2593	Olig2-GFP	0.97105	Oxtl-GFP	0.94374	Hcrt-RFP	0.9124
Diencephalon - Preoptic area posterior dopaminergic cluster	1675.45	Elavl3-H2BRFP	2.6428	Isl2bGal4-uasDendra	2.5778	Gad1b-GFP	1.7849	Anti-TH	1.6367	Elavl3-GCaMP5G	1.4932
Rhombencephalon - Otpb Cluster 1	1663.38	Vglut2a-GFP	1.8137	Elavl3-H2BRFP	1.6765	Otpb.A-Nsfb-GFP	1.4892	EtVmat2-GFP	1.3228	S1181tGal4-uasKaede	1.2679
Diencephalon - Preoptic Area	1650.48	Oxtl-GFP	1.9633	Elavl3-H2BRFP	1.7547	Gad1b-GFP	1.541	Isl2bGal4-uasDendra	1.119	Otpb.A-Nsfb-GFP	1.0717
Rhombencephalon - Olig2 enriched areas in cerebellum	1634.01	Olig2-GFP	2.4255	Gad1b-GFP	2.3099	Ptf1aGal4-uasKaede	1.8641	EtVmat2-GFP	1.7822	Vglut2a-GFP	1.5138
Telencephalon - Telencephalic Migrated Area 4 (M4)	1630.27	Anti-Zn1	2.9503	Anti-Zrf2	2.7844	Anti-5HT	2.281	Anti-tERK	1.8809	Anti-Zn12(Hnk-1)	1.5923
Rhombencephalon - X Vagus motorneuron cluster	1625.39	Isl1-GFP	1.9929	Gad1b-GFP	1.687	Elavl3-H2BRFP	1.6089	Anti-5HT	1.1003	Anti-GlyR	1.0814
Rhombencephalon - Isl1 Stripe 1	1611.49	Elavl3-H2BRFP	1.5961	Gad1b-GFP	1.2344	Isl1-GFP	0.96982	Glyt2-GFP	0.92067	Vglut2a-GFP	0.89481
Rhombencephalon - Glyt2 Stripe 3	1610.01	Glyt2-GFP	1.8125	Elavl3-H2BRFP	1.4952	Anti-Zn1	1.1128	Anti-tERK	0.95875	Oxtl-GFP	0.95068
Rhombencephalon - Ptf1a Cluster 1	1603.88	Ptf1aGal4-uasKaede	1.6843	Elavl3-H2BRFP	1.5473	Anti-5HT	1.0908	Gad1b-GFP	1.0862	Qrfp-GFP	1.04
Rhombencephalon - Olig2 Cluster	1527.8	Olig2-GFP	2.7926	Vglut2a-GFP	2.2205	Anti-5HT	1.9312	Ptf1aGal4-uasKaede	1.7943	Elavl3-H2BRFP	1.7626
Diencephalon - Isl1 cluster 2	1516.79	Elavl3-H2BRFP	2.3796	Gad1b-GFP	1.8317	Oxtl-GFP	1.5003	Isl1-GFP	1.0248	Glyt2-GFP	0.90069
Rhombencephalon - Isl1 Cluster 3	1513.95	Vglut2a-GFP	1.6031	Elavl3-H2BRFP	1.0327	Glyt2-GFP	1.0262	Oxtl-GFP	0.96545	Isl1-GFP	0.92314
Mesencephalon - Isl1 cluster of the mesencephalic region	1511.75	Elavl3-GCaMP5G	1.5563	Gad1b-GFP	1.4412	Elavl3-H2BRFP	1.4401	Vglut2a-GFP	1.3468	Anti-Zrf1(GFAP)	1.1714
Rhombencephalon - 6.7FDhcrtR-Gal4 Cluster 5	1509.32	Vglut2a-GFP	1.9084	EtVmat2-GFP	1.9031	6.7FRhcrtR-Gal4-uasKaede	1.8743	Elavl3-H2BRFP	1.7301	Gad1b-GFP	1.7096
Diencephalon - Hypothalamus Hcrt Neurons	1482.91	Hcrt-RFP	6.4381	Qrfp-GFP	5.3423	Elavl3-H2BRFP	2.3982	S1181tGal4-uasKaede	2.1219	EtVmat2-GFP	1.4142
Rhombencephalon - Lateral Reticular Nucleus	1471.96	Anti-Zrf1(GFAP)	2.9854	Ptf1aGal4-uasKaede	2.1893	Anti-Zn1	1.8854	Anti-5HT	1.7596	Anti-Zrf2	1.5658
Mesencephalon - Retinal Arborization Field 9 (AF9)	1455.19	Anti-Zrf2	2.6006	Isl2bGal4-uasDendra	1.8821	Elavl3-GCaMP5G	1.8713	Anti-GlyR	1.7356	EtVmat2-GFP	1.6705
Rhombencephalon - Vmat2 Stripe1	1452.17	Elavl3-H2BRFP	2.409	Elavl3-GCaMP5G	2.0834	Gad1b-GFP	2.0672	EtVmat2-GFP	2.0165	Anti-5HT	1.8681
Diencephalon - Anterior preoptic dopaminergic cluster	1420.16	Gad1b-GFP	2.5296	Otpb.A-Nsfb-GFP	2.5004	Anti-TH	2.124	Elavl3-H2BRFP	1.8159	Anti-5HT	1.7064
Diencephalon - Otpb Cluster 2	1418.64	Oxtl-GFP	7.4098	Elavl3-H2BRFP	1.9019	Otpb.A-Nsfb-GFP	1.42	Gad1b-GFP	1.1003	Qrfp-GFP	0.89563
Diencephalon - Oxtl Cluster 1 in Preoptic Area	1408.35	Oxtl-GFP	6.5163	Elavl3-H2BRFP	2.1426	Otpb.A-Nsfb-GFP	1.2335	Gad1b-GFP	1.186	Anti-GlyR	0.98501
Diencephalon - Optic Chiasm	1407.37	Isl2bGal4-uasDendra	33.4008	Elavl3-GCaMP5G	2.1847	Anti-Zn12(Hnk-1)	2.083	Anti-Zn1	1.9998	Elavl3-H2BRFP	1.9643
Diencephalon - Olig2 Band	1400.15	Olig2-GFP	2.0422	Oxtl-GFP	0.95316	Elavl3-H2BRFP	0.93969	Gad1b-GFP	0.89236	Vglut2a-GFP	0.87826
Rhombencephalon - Vmat2 Cluster 1	1382.25	EtVmat2-GFP	2.4311	S1181tGal4-uasKaede	1.9069	Elavl3-H2BRFP	1.618	Vglut2a-GFP	1.5192	Elavl3-GCaMP5G	0.96245
Rhombencephalon - Cerebellum Gad1b Enriched Areas	1382.06	Ptf1aGal4-uasKaede	3.9746	Gad1b-GFP	3.1752	Olig2-GFP	2.8931	EtVmat2-GFP	2.533	Otpb.A-Gal4-UAS-GCaMP_6	2.2197
Diencephalon - Posterior Tuberculum	1375	Qrfp-GFP	2.4054	Elavl3-H2BRFP	1.9766	Hcrt-RFP	1.5982	6.7FRhcrtR-Gal4-uasKaede	1.1442	Gad1b-GFP	1.1359
Diencephalon - Pineal Vmat2 cluster	1374.63	EtVmat2-GFP	5.1842	Glyt2-GFP	5.0175	Anti-TH	4.732	Anti-5HT	3.3426	S1181tGal4-uasKaede	3.3049
Rhombencephalon - Vglut2 cluster 2	1371.87	Vglut2a-GFP	3.1965	Elavl3-H2BRFP	1.8666	S1181tGal4-uasKaede	1.6734	Anti-5HT	1.3464	Elavl3-GCaMP5G	1.0309
Telencephalon - Optic Commissure	1365.65	Isl2bGal4-uasDendra	22.7005	Elavl3-GCaMP5G	2.1199	Anti-Zn12(Hnk-1)	1.8944	Anti-Zn1	1.7775	S1181tGal4-uasKaede	1.7111
Rhombencephalon - 6.7FDhcrtR-Gal4 Stripe 2	1356.59	6.7FRhcrtR-Gal4-uasKaede	2.7555	Elavl3-H2BRFP	2.1982	Vglut2a-GFP	1.6917	Anti-5HT	1.2648	Elavl3-GCaMP5G	1.2112
Diencephalon - Dorsal Thalamus	1353.6	Elavl3-H2BRFP	1.1481	Vglut2a-GFP	0.99684	Elavl3-GCaMP5G	0.97193	Oxtl-GFP	0.95684	EtVmat2-GFP	0.90172
Rhombencephalon - Eminentia Granularis	1349.24	Ptf1aGal4-uasKaede	2.6254	Anti-5HT	2.2844	Anti-Gad67	1.9464	Anti-Zn1	1.8641	Otpb.A-Gal4-UAS-GCaMP_6	1.8276
Rhombencephalon - Rhombomere 1	1348.77	Ptf1aGal4-uasKaede	2.1748	Olig2-GFP	1.5171	Gad1b-GFP	1.5117	EtVmat2-GFP	1.4987	Anti-5HT	1.3323
Diencephalon - Hypothalamus 6.7FRhcrtR-Gal4 cluster 2	1346.65	Elavl3-H2BRFP	2.1732	6.7FRhcrtR-Gal4-uasKaede	1.8498	Hcrt-RFP	1.2776	Vglut2a-GFP	1.2649	Oxtl-GFP	1.2629
Rhombencephalon - Raphe - Superior	1336.19	Anti-Zrf1(GFAP)	2.795	EtVmat2-GFP	2.5445	Pet1-GFP	2.4769	Elavl3-H2BRFP	1.1165	Anti-5HT	1.0605
Rhombencephalon - Corpus Cerebelli	1313.84	Ptf1aGal4-uasKaede	2.552	Olig2-GFP	1.8104	EtVmat2-GFP	1.8055	Gad1b-GFP	1.7393	Anti-Zn12(Hnk-1)	1.4983
Rhombencephalon - MiD2	1294.83	SpinalBackfills	5.4527	Elavl3-H2BRFP	1.3802	Anti-GlyR	1.3175	Isl2bGal4-uasDendra	1.195	6.7FRhcrtR-Gal4-uasKaede	1.1677
Rhombencephalon - Cerebellum	1270.4	Ptf1aGal4-uasKaede	3.5432	Olig2-GFP	2.299	EtVmat2-GFP	2.089	Gad1b-GFP	1.9838	Otpb.A-Gal4-UAS-GCaMP_6	1.913
Mesencephalon - Vmat2 cluster of paraventricular organ	1267.64	EtVmat2-GFP	1.9934	Anti-5HT	1.4036	Olig2-GFP	1.0257	Oxtl-GFP	1.0128	Glyt2-GFP	0.96067
Rhombencephalon - Cerebelluar-Vglut2 enriched areas	1258.54	Vglut2a-GFP	2.2673	Elavl3-H2BRFP	1.1586	Elavl3-GCaMP5G	1.0205	EtVmat2-GFP	0.99799	Oxtl-GFP	0.98167
Diencephalon - Isl1 cluster 1	1256.91	Gad1b-GFP	2.0846	Elavl3-H2BRFP	1.9492	Oxtl-GFP	1.3883	Elavl3-GCaMP5G	1.1531	Vglut2a-GFP	1.0091
Rhombencephalon - Small cluster of TH stained neurons	1242.59	EtVmat2-GFP	1.3557	Elavl3-H2BRFP	1.2537	Glyt2-GFP	1.1435	Gad1b-GFP	1.1336	Vglut2a-GFP	0.9935
Rhombencephalon - Glyt2 Cluster 2	1236.02	EtVmat2-GFP	1.9097	Elavl3-H2BRFP	1.6347	Ptf1aGal4-uasKaede	1.5334	Glyt2-GFP	1.4763	Vglut2a-GFP	1.1475
Rhombencephalon - Gad1b Cluster 9	1234.82	EtVmat2-GFP	1.5509	Anti-Zrf1(GFAP)	1.2617	Anti-Zn1	1.1341	Elavl3-GCaMP5G	1.0863	Oxtl-GFP	1.0704
Diencephalon - Isl1 cluster 3	1225.36	Elavl3-H2BRFP	2.0971	Qrfp-GFP	1.4734	Gad1b-GFP	1.3579	6.7FRhcrtR-Gal4-uasKaede	1.2661	Anti-TH	1.2215
Rhombencephalon - Olig2 Stripe	1221.87	EtVmat2-GFP	1.8415	Pet1-GFP	1.6365	Elavl3-GCaMP5G	1.5131	Anti-Zrf1(GFAP)	1.4316	Olig2-GFP	1.4234
Diencephalon - Dopaminergic Cluster 1 - ventral thalamic and periventricular posterior tubercular DA neurons	1220.41	Oxtl-GFP	2.8066	Elavl3-H2BRFP	2.2883	Gad1b-GFP	1.5964	Qrfp-GFP	1.2319	Anti-TH	1.0165
Rhombencephalon - Gad1b Cluster 7	1211.1	Ptf1aGal4-uasKaede	2.6619	Anti-5HT	2.3461	Anti-Gad67	2.2115	Anti-Zn1	1.9093	Otpb.A-Gal4-UAS-GCaMP_6	1.8847
Rhombencephalon - S1181t Cluster	1203.78	S1181tGal4-uasKaede	2.2873	Vglut2a-GFP	2.2076	Elavl3-H2BRFP	1.6871	Anti-5HT	1.1256	Elavl3-GCaMP5G	1.0479
Mesencephalon -	1201.28	Isl2bGal4-uasDendra	11.7497	Elavl3-GCaMP5G	4.4104	Gad1b-GFP	4.1893	Anti-Znp1(Synaptotagmin2)	3.8357	Anti-Zrf2	3.4038
Diencephalon - Hypothalamus Qrfp neuron cluster	1191.27	Qrfp-GFP	12.811	Hcrt-RFP	3.4421	Elavl3-H2BRFP	2.7213	S1181tGal4-uasKaede	1.946	Anti-tERK	1.3729
Rhombencephalon - Gad1b Cluster 15	1190.98	Elavl3-H2BRFP	1.7302	EtVmat2-GFP	1.5359	Glyt2-GFP	1.3938	S1181tGal4-uasKaede	1.1247	Ptf1aGal4-uasKaede	1.1032
Diencephalon - Ventral Thalamus	1176.91	Gad1b-GFP	2.4402	Elavl3-H2BRFP	1.3104	Oxtl-GFP	0.92755	Elavl3-GCaMP5G	0.88748	Olig2-GFP	0.86628
Mesencephalon - Medial Tectal Band	1175.08	Gad1b-GFP	2.0956	Elavl3-H2BRFP	1.3503	Anti-tERK	0.96435	Oxtl-GFP	0.94731	Qrfp-GFP	0.88795
Rhombencephalon - Vglut2 Stripe 4	1161.39	Vglut2a-GFP	1.5323	Elavl3-H2BRFP	1.3924	SpinalBackfills	1.2223	S1181tGal4-uasKaede	0.98974	Oxtl-GFP	0.9436
Diencephalon - Pineal	1161.23	Anti-TH	5.3523	Glyt2-GFP	4.5245	EtVmat2-GFP	3.5162	S1181tGal4-uasKaede	3.2618	Anti-5HT	3.1811
Ganglia - Olfactory Epithelium	1156.33	Elavl3-H2BRFP	4.7128	Vglut2a-GFP	3.3384	Pet1-GFP	3.1226	Olig2-GFP	3.1209	Otpb.A-Gal4-UAS-GCaMP_6	3.1036
Diencephalon - Oxtl Cluster 5	1154.7	Oxtl-GFP	1.451	Elavl3-H2BRFP	1.3955	EtVmat2-GFP	1.2099	Vglut2a-GFP	1.1203	Glyt2-GFP	0.95339
Rhombencephalon - Rhombomere 7	1154.53	Gad1b-GFP	4.1023	Anti-GlyR	3.1678	Elavl3-GCaMP5G	2.9526	Elavl3-H2BRFP	2.8619	Anti-Zrf2	2.766
Mesencephalon - Vmat2 cluster2	1152.81	Elavl3-H2BRFP	1.7196	Gad1b-GFP	1.6267	Oxtl-GFP	1.2681	Qrfp-GFP	1.1928	EtVmat2-GFP	1.0805
Rhombencephalon - Otpb Cluster 5	1151.29	S1181tGal4-uasKaede	2.1204	Otpb.A-Nsfb-GFP	1.8186	Elavl3-H2BRFP	1.5513	Glyt2-GFP	1.3723	SpinalBackfills	1.0907
Diencephalon - Olig2 Band 2	1143.76	Olig2-GFP	1.6607	Gad1b-GFP	1.113	Oxtl-GFP	0.99605	Vglut2a-GFP	0.93274	Qrfp-GFP	0.89423
Rhombencephalon - Gad1b Cluster 14	1140.89	6.7FRhcrtR-Gal4-uasKaede	2.0284	Elavl3-H2BRFP	1.7877	Vglut2a-GFP	1.6391	Anti-Zn1	1.495	Anti-5HT	1.2972
Diencephalon - Dopaminergic Cluster 2 - posterior tuberculum	1139.76	Qrfp-GFP	3.3093	Hcrt-RFP	2.5591	Elavl3-H2BRFP	2.1153	Anti-TH	1.8405	S1181tGal4-uasKaede	1.7545
Rhombencephalon - 6.7FDhcrtR-Gal4 Cluster 2 Sparse	1134.24	Elavl3-H2BRFP	1.5542	6.7FRhcrtR-Gal4-uasKaede	1.3871	Ptf1aGal4-uasKaede	1.0543	Glyt2-GFP	0.9905	Oxtl-GFP	0.9731
Spinal Cord - 6.7FDhcrtR-Gal4 Stripe	1129.51	Elavl3-H2BRFP	2.4131	6.7FRhcrtR-Gal4-uasKaede	2.1987	Gad1b-GFP	1.6709	Elavl3-GCaMP5G	1.6153	Anti-Zrf2	1.3877
Rhombencephalon - Qrfp neuron cluster sparse	1121.41	Vglut2a-GFP	4.8794	Elavl3-H2BRFP	2.4153	Anti-5HT	1.4675	Qrfp-GFP	1.3193	Elavl3-GCaMP5G	1.2571
Diencephalon - Retinal Arborization Field 1 (AF1- Approximate Location)	1117.41	Isl2bGal4-uasDendra	3.5763	Anti-Zrf2	2.7444	Anti-Zn1	2.0802	Anti-5HT	1.9939	Anti-tERK	1.7281
Diencephalon - Dopaminergic Cluster 6 - hypothalamus	1115.64	Anti-Zrf1(GFAP)	1.3974	Anti-TH	1.2883	Vglut2a-GFP	1.1308	Elavl3-H2BRFP	1.0867	Gad1b-GFP	0.96153
Diencephalon - Rostral Hypothalamus	1114.13	Qrfp-GFP	3.3662	Elavl3-H2BRFP	2.41	Hcrt-RFP	2.1585	Anti-tERK	1.3177	S1181tGal4-uasKaede	1.1605
Diencephalon -	1113.86	Vglut2a-GFP	1.468	Elavl3-H2BRFP	1.4034	Qrfp-GFP	1.2801	Oxtl-GFP	1.225	Anti-tERK	1.1931
Rhombencephalon - Otpb Cluster 3	1112.87	Otpb.A-Nsfb-GFP	1.4241	S1181tGal4-uasKaede	1.2853	Oxtl-GFP	0.98349	Hcrt-RFP	0.97548	Anti-tERK	0.97177
Diencephalon - Oxtl Cluster 2	1103.94	Isl2bGal4-uasDendra	3.5164	Elavl3-H2BRFP	2.0962	Oxtl-GFP	1.5958	Anti-Zn1	1.4598	Anti-5HT	1.4567
Rhombencephalon - Gad1b Cluster 13	1099.5	Gad1b-GFP	2.6125	6.7FRhcrtR-Gal4-uasKaede	2.4385	Anti-Znp1(Synaptotagmin2)	2.2169	Anti-Zn1	1.9157	Anti-Gad67	1.8468
Rhombencephalon - Vglut2 Stripe 1	1099.05	Vglut2a-GFP	5.8907	Elavl3-H2BRFP	3.0529	Elavl3-GCaMP5G	1.952	Anti-5HT	1.7857	Anti-Zn1	1.4342
Rhombencephalon - Glyt2 Cluster 4	1098.57	SpinalBackfills	1.8943	Glyt2-GFP	1.8172	Elavl3-H2BRFP	1.5225	6.7FRhcrtR-Gal4-uasKaede	1.1585	Qrfp-GFP	0.95183
Rhombencephalon - Otpb Cluster 4	1090.93	Anti-Zn1	1.3047	Otpb.A-Gal4-UAS-GCaMP_6	1.2322	Anti-Zrf1(GFAP)	1.1607	Oxtl-GFP	0.98935	Anti-Gad67	0.98447
Mesencephalon - Tectum Stratum Periventriculare	1088.33	Elavl3-H2BRFP	3.4379	Elavl3-GCaMP5G	2.4057	Gad1b-GFP	2.2075	Vglut2a-GFP	2.1914	Anti-5HT	1.3982
Rhombencephalon -	1087.86	Anti-GlyR	3.4162	Anti-Zn1	2.5219	Anti-5HT	2.4381	Elavl3-H2BRFP	2.3023	Anti-Znp1(Synaptotagmin2)	2.1328
Diencephalon - Hypothalamus s1181t Cluster	1081.68	Qrfp-GFP	10.6005	Hcrt-RFP	5.3158	S1181tGal4-uasKaede	3.0978	Elavl3-H2BRFP	2.5483	Anti-Zrf2	1.4479
Diencephalon - Hypothalamus 6.7FRhcrtR-Gal4 cluster 1	1079.49	6.7FRhcrtR-Gal4-uasKaede	3.5517	Elavl3-H2BRFP	2.4778	Qrfp-GFP	1.5744	Hcrt-RFP	1.1868	Gad1b-GFP	1.0953
Rhombencephalon - Gad1b Cluster 3	1072.96	EtVmat2-GFP	2.3004	Pet1-GFP	1.8591	Gad1b-GFP	1.3651	Anti-TH	1.0449	Anti-tERK	0.97149
Diencephalon - Oxtl Cluster 4 - sparse in hypothalamus	1061.7	EtVmat2-GFP	1.2248	Oxtl-GFP	1.221	Vglut2a-GFP	1.1155	Elavl3-H2BRFP	1.113	Anti-Zrf2	1.0328
Rhombencephalon - Inferior Olive	1055.82	Elavl3-H2BRFP	3.9505	Vglut2a-GFP	3.4613	Ptf1aGal4-uasKaede	3.0496	Elavl3-GCaMP5G	2.0007	Anti-Zn1	1.8499
Rhombencephalon - Raphe - Inferior	1052.65	EtVmat2-GFP	3.3796	Pet1-GFP	3.3732	Elavl3-H2BRFP	1.6728	Olig2-GFP	1.4386	Elavl3-GCaMP5G	1.3135
Rhombencephalon - Mauthner Cell Axon Cap	1038.6	6.7FRhcrtR-Gal4-uasKaede	4.8435	Anti-Znp1(Synaptotagmin2)	2.8932	Anti-Zn1	1.6171	Hcrt-RFP	1.3199	Oxtl-GFP	1.3147
Rhombencephalon - Gad1b Stripe 3	1035.59	Elavl3-H2BRFP	1.3381	Vglut2a-GFP	1.2687	Oxtl-GFP	0.9328	Qrfp-GFP	0.90058	Hcrt-RFP	0.87329
Diencephalon - Eminentia Thalami	1032.33	Vglut2a-GFP	3.4091	Oxtl-GFP	2.2406	Elavl3-H2BRFP	1.3131	Anti-GlyR	1.2753	Olig2-GFP	1.182
Rhombencephalon - Glyt2 Cluster 1	1023.31	S1181tGal4-uasKaede	1.5576	Glyt2-GFP	1.543	Elavl3-H2BRFP	1.4221	6.7FRhcrtR-Gal4-uasKaede	1.2697	Elavl3-GCaMP5G	0.97116
Diencephalon - Otpb Cluster 4	1022.71	Qrfp-GFP	2.7848	Elavl3-H2BRFP	2.745	Otpb.A-Gal4-UAS-GCaMP_6	1.7181	Hcrt-RFP	1.5758	Oxtl-GFP	1.5469
Diencephalon - Postoptic Commissure	1021.08	Qrfp-GFP	2.3804	Anti-Zrf2	2.0307	Anti-tERK	1.7513	Anti-5HT	1.6785	Anti-TH	1.4862
Rhombencephalon - Vmat2 Cluster 4	1019.43	EtVmat2-GFP	2.5352	Elavl3-H2BRFP	1.8444	6.7FRhcrtR-Gal4-uasKaede	1.8086	Vglut2a-GFP	1.4031	Anti-tERK	0.99076
Mesencephalon - Retinal Arborization Field 8 (AF8)	1018.82	EtVmat2-GFP	2.7657	Anti-Zrf2	2.5538	Isl2bGal4-uasDendra	2.2705	Anti-TH	1.8195	Anti-Zrf1(GFAP)	1.759
Rhombencephalon - Gad1b Cluster 5	1013.81	Elavl3-H2BRFP	1.5206	Gad1b-GFP	1.2978	6.7FRhcrtR-Gal4-uasKaede	1.2543	S1181tGal4-uasKaede	0.98095	Oxtl-GFP	0.9718
Rhombencephalon - Interpeduncular Nucleus	1013.26	Anti-Zrf1(GFAP)	2.2894	Gad1b-GFP	1.2181	Vglut2a-GFP	1.1632	Elavl3-H2BRFP	1.0348	Oxtl-GFP	0.92269
Rhombencephalon - Caudal Ventral Cluster Labelled by Spinal Backfills	1009.79	SpinalBackfills	1.9034	Vglut2a-GFP	1.4426	Elavl3-H2BRFP	1.4382	Isl2bGal4-uasDendra	1.2861	Elavl3-GCaMP5G	1.2137
Diencephalon - Otpb Cluster 1	1006.39	Anti-TH	2.5196	EtVmat2-GFP	1.5294	Otpb.A-Nsfb-GFP	1.5235	Hcrt-RFP	1.39	Anti-Zrf2	1.3666
Mesencephalon - Torus Semicircularis	999.316	Anti-5HT	2.0161	Elavl3-H2BRFP	1.9776	Vglut2a-GFP	1.846	Anti-Znp1(Synaptotagmin2)	1.8112	Gad1b-GFP	1.7913
Rhombencephalon - Vglut2 cluster 1	998.937	Vglut2a-GFP	0.99248	Anti-tERK	0.9812	S1181tGal4-uasKaede	0.97938	Oxtl-GFP	0.97003	Hcrt-RFP	0.91069
Rhombencephalon - 6.7FDhcrtR-Gal4 Stripe 3	995.909	6.7FRhcrtR-Gal4-uasKaede	2.1921	Vglut2a-GFP	1.7643	Elavl3-H2BRFP	1.1951	S1181tGal4-uasKaede	1.0846	Elavl3-GCaMP5G	1.0369
Rhombencephalon - Oxtl Cluster 2 Near MC axon cap	995.317	Anti-Zn1	1.5112	Anti-Znp1(Synaptotagmin2)	1.4615	6.7FRhcrtR-Gal4-uasKaede	1.3708	Oxtl-GFP	1.3274	Hcrt-RFP	1.1048
Rhombencephalon - Rhombomere 2	995.136	Vglut2a-GFP	1.506	Anti-5HT	1.4628	Anti-GlyR	1.4204	S1181tGal4-uasKaede	1.3962	Elavl3-H2BRFP	1.3478
Ganglia - Lateral Line Neuromast SO1	990.948	Olig2-GFP	2.7419	Pet1-GFP	2.3262	6.7FRhcrtR-Gal4-uasKaede	2.2331	Anti-Zrf1(GFAP)	2.1712	Isl1-GFP	2.1501
Rhombencephalon - Gad1b Cluster 6	985.181	Elavl3-H2BRFP	1.5917	S1181tGal4-uasKaede	1.3601	Gad1b-GFP	1.2153	Qrfp-GFP	1.0303	Oxtl-GFP	0.97076
Diencephalon - Dopaminergic Cluster 4/5 - posterior tuberculum and hypothalamus	978.443	Anti-TH	2.0998	EtVmat2-GFP	1.3494	Otpb.A-Nsfb-GFP	1.2679	Elavl3-H2BRFP	1.2187	Vglut2a-GFP	1.0703
Diencephalon - Hypothalamus Vglut2 Cluster 5	973.527	Vglut2a-GFP	1.5202	Anti-Zrf1(GFAP)	1.1115	Gad1b-GFP	1.1114	Ptf1aGal4-uasKaede	1.0773	Anti-tERK	1.0307
Telencephalon - Subpallial Otpb strip	972.298	Vglut2a-GFP	1.4351	Oxtl-GFP	1.0854	Anti-GlyR	0.96855	Elavl3-H2BRFP	0.85229	Otpb.A-Nsfb-GFP	0.84294
Diencephalon - Hypothalamus Vglut2 Cluster 1	950.115	Vglut2a-GFP	1.8101	Elavl3-H2BRFP	1.1235	Oxtl-GFP	0.99157	Glyt2-GFP	0.96017	Olig2-GFP	0.93016
Rhombencephalon - Glyt2 Cluster 13	947.26	Anti-Znp1(Synaptotagmin2)	3.5123	Anti-GlyR	2.8073	Anti-Gad67	2.7819	Anti-Zn1	2.6415	Glyt2-GFP	2.4439
Rhombencephalon - Cerebellar Neuropil 1	945.598	Anti-Zrf2	4.3016	Anti-GlyR	2.6086	EtVmat2-GFP	2.4413	Anti-Znp1(Synaptotagmin2)	1.8914	Vglut2a-GFP	1.8027
Rhombencephalon - Gad1b Cluster 16	939.33	Isl1-GFP	1.5354	Elavl3-H2BRFP	1.2843	Gad1b-GFP	1.1886	Oxtl-GFP	0.96449	Qrfp-GFP	0.90474
Rhombencephalon - Gad1b Cluster 8	934.867	Elavl3-H2BRFP	1.2008	Gad1b-GFP	1.0711	Vglut2a-GFP	1.0162	EtVmat2-GFP	1.0106	Pet1-GFP	0.99849
Rhombencephalon - Neuropil Region 6	933.402	Isl2bGal4-uasDendra	1.18	Anti-Zrf2	1.09	Gad1b-GFP	1.0623	Anti-Gad67	1.041	Anti-tERK	1.0203
Rhombencephalon - Rhombomere 4	921.211	Anti-GlyR	1.8131	SpinalBackfills	1.5916	Anti-Znp1(Synaptotagmin2)	1.5031	S1181tGal4-uasKaede	1.3976	Anti-Zn1	1.3621
Diencephalon - Hypothalamus Olig2 cluster 2	919.509	Vglut2a-GFP	1.8103	Anti-Zrf1(GFAP)	1.3407	Olig2-GFP	1.2934	Gad1b-GFP	1.0899	Oxtl-GFP	0.96915
Mesencephalon - Retinal Arborization Field 7 (AF7)	918.016	Isl2bGal4-uasDendra	5.6801	Anti-GlyR	4.8265	Anti-Znp1(Synaptotagmin2)	4.5701	Elavl3-GCaMP5G	3.1367	Anti-Zn1	2.8723
Rhombencephalon - Neuropil Region 4	909.12	Anti-Znp1(Synaptotagmin2)	4.5167	Anti-Gad67	3.7752	Anti-GlyR	3.5752	Anti-Zn1	3.1884	Anti-Zrf2	2.7864
Diencephalon - Hypothalamus Gad1b Cluster 1	900.197	Gad1b-GFP	1.769	Elavl3-GCaMP5G	1.4331	Anti-Zrf2	1.3614	Anti-Zn1	1.3376	Anti-5HT	1.2962
Diencephalon - Hypothalamus Gad1b Cluster 2	895.003	Qrfp-GFP	2.5868	Anti-Zrf2	2.5278	Anti-tERK	2.1365	Anti-5HT	1.7116	Anti-Znp1(Synaptotagmin2)	1.6317
Rhombencephalon - Glyt2 Cluster 8	890.651	SpinalBackfills	1.4795	EtVmat2-GFP	1.1977	Glyt2-GFP	1.1009	Anti-Zrf1(GFAP)	1.0755	Oxtl-GFP	1.0484
Rhombencephalon - RoM2	888.117	SpinalBackfills	3.996	Elavl3-H2BRFP	1.5361	Isl1-GFP	1.428	Anti-GlyR	1.1388	Hcrt-RFP	1.1124
Diencephalon - Migrated Posterior Tubercular Area (M2)	886.437	Vglut2a-GFP	1.4097	Gad1b-GFP	1.3586	Anti-Zrf2	1.2296	Anti-Zn1	1.2135	Elavl3-H2BRFP	1.2089
Ganglia - Lateral Line Neuromast OC1	885.525	Anti-Zrf1(GFAP)	3.3987	Anti-TH	2.3027	Pet1-GFP	2.1725	Otpb.A-Gal4-UAS-GCaMP_6	2.0453	Anti-Zn12(Hnk-1)	1.9944
Rhombencephalon - Glyt2 Cluster 11	884.341	6.7FRhcrtR-Gal4-uasKaede	3.0617	Gad1b-GFP	2.0551	Glyt2-GFP	1.5798	Elavl3-H2BRFP	1.3717	Anti-Zn1	1.3404
Rhombencephalon - Isl1 Cluster 2	882.351	Isl1-GFP	1.6472	Anti-Zrf1(GFAP)	1.1024	Anti-Zn1	1.0643	Oxtl-GFP	0.97404	Hcrt-RFP	0.92715
Rhombencephalon - Rhombomere 3	880.227	Anti-GlyR	1.6519	Anti-Znp1(Synaptotagmin2)	1.314	SpinalBackfills	1.2828	Anti-Zrf2	1.1944	Elavl3-H2BRFP	1.1815
Diencephalon - Retinal Arborization Field 2 (AF2- Approximate Location)	877.624	Isl2bGal4-uasDendra	11.8383	Anti-Zn1	2.495	Anti-Zrf2	2.3369	Anti-tERK	1.9339	Anti-5HT	1.9231
Rhombencephalon - Glyt2 Cluster 10	872.794	Anti-GlyR	1.6356	Elavl3-H2BRFP	1.4634	Anti-TH	1.3263	Anti-Znp1(Synaptotagmin2)	1.3237	Glyt2-GFP	1.3224
Diencephalon - Hypothalamus Vglut2 Cluster 2	872.367	Vglut2a-GFP	2.5089	Anti-5HT	1.5351	Elavl3-H2BRFP	1.5304	Gad1b-GFP	1.4677	Anti-Zn1	1.3369
Mesencephalon - Tecum Neuropil	872.201	Isl2bGal4-uasDendra	16.5023	Anti-Znp1(Synaptotagmin2)	9.2813	Anti-Zrf2	5.6869	Anti-Gad67	5.1109	Anti-GlyR	4.9493
Rhombencephalon - RoL2	871.549	Anti-Zrf2	2.0054	SpinalBackfills	1.8761	Anti-Znp1(Synaptotagmin2)	1.5454	S1181tGal4-uasKaede	1.4462	Anti-GlyR	1.422
Ganglia - Lateral Line Neuromast SO2	870.331	Otpb.A-Gal4-UAS-GCaMP_6	2.8553	Anti-Zrf1(GFAP)	2.8511	Isl1-GFP	2.8445	Olig2-GFP	2.7502	Pet1-GFP	2.7467
Ganglia - Facial Sensory Ganglion	868.014	Elavl3-H2BRFP	2.7779	Isl1-GFP	1.8827	Vglut2a-GFP	1.5775	S1181tGal4-uasKaede	1.51	Isl2bGal4-uasDendra	1.4047
Ganglia - Anterior Lateral Line Ganglion	860.19	Elavl3-H2BRFP	3.1319	Anti-Zn12(Hnk-1)	1.8749	Isl2bGal4-uasDendra	1.6769	Anti-TH	1.4663	Elavl3-GCaMP5G	1.3365
Rhombencephalon - Valvula Cerebelli	856.201	Ptf1aGal4-uasKaede	1.8249	Anti-Znp1(Synaptotagmin2)	1.3092	Vglut2a-GFP	1.1827	Olig2-GFP	1.1304	SpinalBackfills	1.0471
Rhombencephalon - CaD	849.886	SpinalBackfills	6.1765	Elavl3-H2BRFP	1.8122	Vglut2a-GFP	1.5603	Gad1b-GFP	1.3254	Isl2bGal4-uasDendra	1.2202
Ganglia - Lateral Line Neuromast SO3	849.664	Anti-Zrf1(GFAP)	4.4083	Olig2-GFP	2.7551	Isl1-GFP	2.7407	Anti-Zn12(Hnk-1)	2.7255	Pet1-GFP	2.4955
Ganglia - Trigeminal Ganglion	848.66	Elavl3-H2BRFP	3.6849	Isl2bGal4-uasDendra	1.9292	Anti-Zn12(Hnk-1)	1.8916	Anti-TH	1.6953	Isl1-GFP	1.5652
Diencephalon - Retinal Arborization Field 5 (AF5)	845.89	Isl2bGal4-uasDendra	4.5859	Anti-Gad67	3.2634	Anti-Zrf2	3.2408	Anti-Znp1(Synaptotagmin2)	3.176	Anti-Zn1	3.1236
Rhombencephalon - 6.7FDhcrtR-Gal4 Stripe 4	845.131	6.7FRhcrtR-Gal4-uasKaede	2.5847	S1181tGal4-uasKaede	1.4324	Vglut2a-GFP	1.2697	Elavl3-GCaMP5G	1.2294	Isl1-GFP	1.1357
Rhombencephalon - Tangential Vestibular Nucleus	844.258	6.7FRhcrtR-Gal4-uasKaede	6.0485	Anti-Znp1(Synaptotagmin2)	1.9585	Anti-GlyR	1.9194	Anti-Zn1	1.7436	Anti-Gad67	1.3695
Diencephalon - Migrated Area of the Pretectum (M1)	840.689	Isl2bGal4-uasDendra	2.0531	Anti-Zrf2	1.935	Anti-Znp1(Synaptotagmin2)	1.9289	Anti-Gad67	1.6024	Anti-Zrf1(GFAP)	1.5716
Ganglia - Lateral Line Neuromast N	840.423	Anti-GlyR	NaN	Ptf1aGal4-uasKaede	2.7291	Olig2-GFP	2.6422	Pet1-GFP	2.5395	Isl1-GFP	2.539
Diencephalon - Retinal Arborization Field 4 (AF4)	839.768	Isl2bGal4-uasDendra	2.9165	Anti-Zrf2	2.1363	Anti-GlyR	2.1068	Anti-Gad67	1.9136	Anti-Znp1(Synaptotagmin2)	1.7883
Diencephalon - Hypothalamus - Intermediate Hypothalamus Neural Cluster	835.616	EtVmat2-GFP	1.4833	Gad1b-GFP	1.0957	Anti-Zn1	1.0658	Anti-Zrf2	1.0398	Anti-TH	0.9964
Rhombencephalon - Glyt2 Cluster 12	835.227	6.7FRhcrtR-Gal4-uasKaede	2.5199	Anti-GlyR	1.7752	Anti-Znp1(Synaptotagmin2)	1.5612	Elavl3-H2BRFP	1.3775	Glyt2-GFP	1.2796
Diencephalon - Dopaminergic Cluster 7 - Caudal Hypothalamus	832.918	Anti-TH	1.3486	EtVmat2-GFP	1.2742	Anti-Zrf2	1.2695	Anti-GlyR	1.2155	Anti-tERK	1.122
Diencephalon - Retinal Arborization Field 3 (AF3)	828.975	Isl2bGal4-uasDendra	4.3971	Anti-Zrf2	2.5158	Anti-Gad67	2.1543	Anti-Znp1(Synaptotagmin2)	2.0718	Anti-GlyR	2.0109
Diencephalon - Retinal Arborization Field 6 (AF6)	828.294	Isl2bGal4-uasDendra	8.8984	Anti-Znp1(Synaptotagmin2)	5.272	Anti-Gad67	3.0613	Anti-Zn1	2.9273	Anti-Zrf2	2.1793
Rhombencephalon - Vglut2 cluster 4	828.078	EtVmat2-GFP	2.4567	Elavl3-H2BRFP	1.7526	Pet1-GFP	1.6992	Vglut2a-GFP	1.3283	SpinalBackfills	1.2632
Rhombencephalon - Glyt2 Cluster 9	825.726	Anti-Znp1(Synaptotagmin2)	1.7232	Anti-GlyR	1.6294	Anti-Zrf2	1.522	Anti-Zn1	1.4472	Anti-TH	1.4218
Rhombencephalon - Rhombomere 6	823.934	Vglut2a-GFP	3.2242	Elavl3-H2BRFP	2.0809	Anti-Zn1	1.8736	Anti-Znp1(Synaptotagmin2)	1.8333	Elavl3-GCaMP5G	1.8199
Rhombencephalon - Neuropil Region 3	816.73	Anti-GlyR	4.0486	Anti-Zrf2	4.0424	Anti-Znp1(Synaptotagmin2)	3.3406	Elavl3-GCaMP5G	2.5047	Isl2bGal4-uasDendra	2.3187
Rhombencephalon - Gad1b Cluster 12	816.709	SpinalBackfills	4.0311	Gad1b-GFP	1.4532	Anti-Znp1(Synaptotagmin2)	1.3679	Anti-GlyR	1.3629	Elavl3-H2BRFP	1.3592
Rhombencephalon - Spinal Backfill Vestibular Population	816.549	SpinalBackfills	4.3592	Anti-GlyR	2.9177	S1181tGal4-uasKaede	2.2618	Anti-Znp1(Synaptotagmin2)	1.9937	Anti-Zn1	1.8994
Rhombencephalon - Glyt2 Cluster 14	816.439	S1181tGal4-uasKaede	2.6974	SpinalBackfills	2.3715	Anti-GlyR	2.3585	Glyt2-GFP	2.0357	Ptf1aGal4-uasKaede	1.8989
Rhombencephalon - 6.7FDhcrtR-Gal4 Cluster 4	814.195	6.7FRhcrtR-Gal4-uasKaede	2.702	Anti-Znp1(Synaptotagmin2)	2.4473	Gad1b-GFP	2.3666	Anti-Gad67	2.0911	Anti-Zn1	1.7755
Rhombencephalon - Glyt2 Cluster 7	812.673	SpinalBackfills	1.602	Anti-Zrf1(GFAP)	1.4842	Glyt2-GFP	1.1844	Anti-Zn1	1.1492	Oxtl-GFP	1.089
Ganglia - Lateral Line Neuromast D1	806.13	Olig2-GFP	3.4309	Pet1-GFP	3.4057	Otpb.A-Gal4-UAS-GCaMP_6	3.1675	Anti-Zrf1(GFAP)	3.1479	Anti-Zn12(Hnk-1)	3.0425
Ganglia - Vagal Ganglia	805.909	Elavl3-H2BRFP	8.1077	Isl1-GFP	2.8179	Anti-5HT	2.5058	Pet1-GFP	2.4513	Otpb.A-Gal4-UAS-GCaMP_6	2.1511
Diencephalon - Hypothalamus Gad1b Cluster 3 Sparse	802.694	Elavl3-H2BRFP	2.0818	Anti-tERK	2.0543	Isl2bGal4-uasDendra	1.8947	Anti-Zrf2	1.8872	Anti-5HT	1.8517
Rhombencephalon - Posterior Cluster of nV Trigeminal Motorneurons	802.237	Isl1-GFP	2.9228	Anti-GlyR	1.5498	Anti-Znp1(Synaptotagmin2)	1.4174	Anti-Zrf2	1.3147	6.7FRhcrtR-Gal4-uasKaede	1.2869
Diencephalon - Intermediate Hypothalamus	802.015	Anti-tERK	1.8949	Elavl3-GCaMP5G	1.6483	Anti-Zn1	1.628	Anti-Zrf2	1.6251	Vglut2a-GFP	1.5819
Rhombencephalon - Gad1b Cluster 19	801.639	Anti-GlyR	3.0366	S1181tGal4-uasKaede	2.916	SpinalBackfills	2.5507	Anti-Znp1(Synaptotagmin2)	2.389	Ptf1aGal4-uasKaede	2.1022
Ganglia - Posterior Lateral Line Ganglia	799.448	Elavl3-H2BRFP	5.8745	Anti-Zn12(Hnk-1)	3.5713	Pet1-GFP	3.4005	Olig2-GFP	2.6799	Otpb.A-Gal4-UAS-GCaMP_6	2.6675
Rhombencephalon - Neuropil Region 2	794.598	Anti-GlyR	4.9103	Anti-Znp1(Synaptotagmin2)	4.9077	Anti-Zrf2	3.5946	Isl2bGal4-uasDendra	3.4728	Elavl3-GCaMP5G	2.7529
Rhombencephalon - Neuropil Region 5	792.287	Anti-GlyR	2.6694	Anti-Znp1(Synaptotagmin2)	2.1283	Anti-Zrf2	2.1132	Isl2bGal4-uasDendra	1.6214	Anti-Zn1	1.609
Rhombencephalon - Glyt2 Cluster 3	789.471	Glyt2-GFP	2.1264	Ptf1aGal4-uasKaede	2.0691	6.7FRhcrtR-Gal4-uasKaede	1.9729	Elavl3-H2BRFP	1.2314	S1181tGal4-uasKaede	1.1559
Rhombencephalon - Mauthner	787.582	SpinalBackfills	5.3684	S1181tGal4-uasKaede	4.9112	Anti-GlyR	1.5193	Anti-Znp1(Synaptotagmin2)	1.2989	6.7FRhcrtR-Gal4-uasKaede	1.2166
Diencephalon - Hypothamic VentroLateral VMAT cluster	786.049	Elavl3-H2BRFP	2.8451	EtVmat2-GFP	1.5413	Vglut2a-GFP	1.5263	Anti-Zrf1(GFAP)	1.4884	Isl1-GFP	1.4693
Telencephalon - Postoptic Commissure	778.177	Anti-Zrf2	3.1705	Anti-5HT	2.2787	Anti-tERK	2.2085	Qrfp-GFP	2.0786	Anti-Zn1	1.8741
Diencephalon - Diffuse Nucleus of the Intermediate Hypothalamus	777.98	Elavl3-H2BRFP	2.0765	Anti-5HT	2.0099	Anti-tERK	1.7996	Vglut2a-GFP	1.7788	Elavl3-GCaMP5G	1.5734
Diencephalon - Torus Lateralis	775.797	Elavl3-H2BRFP	2.6085	Vglut2a-GFP	1.975	Anti-5HT	1.963	Anti-tERK	1.7208	S1181tGal4-uasKaede	1.7063
Diencephalon - Hypothalamus Vglut2 Cluster 3	770.818	Vglut2a-GFP	2.2367	Anti-5HT	2.1106	Anti-tERK	2.0958	Elavl3-H2BRFP	2.0836	Elavl3-GCaMP5G	1.8738
Rhombencephalon - Ventrolateral population of serotonergic neurons	767.698	Anti-GlyR	1.7714	EtVmat2-GFP	1.4727	Pet1-GFP	1.406	Anti-5HT	1.3875	Anti-Zrf2	1.3022
Rhombencephalon - CaV	766.093	SpinalBackfills	5.4159	Anti-Znp1(Synaptotagmin2)	1.7466	Anti-GlyR	1.4563	Isl2bGal4-uasDendra	1.4351	Vglut2a-GFP	1.4161
Rhombencephalon - RoL3	765.173	SpinalBackfills	3.9066	Anti-Znp1(Synaptotagmin2)	1.8511	Anti-Zrf2	1.6062	Anti-GlyR	1.4507	6.7FRhcrtR-Gal4-uasKaede	1.3734
Rhombencephalon - MiM1	760.944	SpinalBackfills	5.6868	S1181tGal4-uasKaede	1.3247	Anti-Zrf1(GFAP)	1.2712	Anti-Zn1	1.2581	Oxtl-GFP	1.1402
Diencephalon - Hypothalamus Vglut2 Cluster 6	751.351	Elavl3-H2BRFP	2.8887	Anti-5HT	2.1858	Anti-tERK	2.0158	Vglut2a-GFP	1.9024	Anti-Zn1	1.7394
Ganglia - Lateral Line Neuromast O1	749.683	Pet1-GFP	5.3694	Otpb.A-Gal4-UAS-GCaMP_6	5.1735	Olig2-GFP	4.281	Anti-Zn12(Hnk-1)	4.1272	Anti-Zrf1(GFAP)	4.0744
Diencephalon - Caudal Hypothalamus	741.746	Anti-5HT	1.7774	EtVmat2-GFP	1.5622	Anti-GlyR	1.5481	Anti-Zrf2	1.3656	Ptf1aGal4-uasKaede	1.1724
Rhombencephalon - Spiral Fiber Neuron Posterior cluster	735.601	6.7FRhcrtR-Gal4-uasKaede	4.1369	SpinalBackfills	2.5086	Isl1-GFP	1.3348	Elavl3-H2BRFP	1.3189	Qrfp-GFP	1.0967
Rhombencephalon - Vmat2 Cluster 2	733.328	EtVmat2-GFP	2.3746	Elavl3-H2BRFP	1.6774	S1181tGal4-uasKaede	1.3778	Glyt2-GFP	1.0908	Vglut2a-GFP	1.0201
Rhombencephalon - RoM1	726.569	SpinalBackfills	1.8464	Elavl3-H2BRFP	1.4157	Gad1b-GFP	1.0759	Isl2bGal4-uasDendra	0.97837	Hcrt-RFP	0.97556
Ganglia - Statoacoustic Ganglion	726.053	Elavl3-H2BRFP	2.6476	Anti-GlyR	1.6695	6.7FRhcrtR-Gal4-uasKaede	1.3799	Anti-Znp1(Synaptotagmin2)	1.3783	Anti-Zn1	1.2553
Diencephalon - Hypothalamus Olig2 cluster	718.079	Elavl3-H2BRFP	3.0332	Olig2-GFP	2.3688	Vglut2a-GFP	1.9866	Isl1-GFP	1.7831	Anti-5HT	1.7635
Rhombencephalon - Isl1 Cluster 1	699.064	Isl1-GFP	2.0491	S1181tGal4-uasKaede	1.543	6.7FRhcrtR-Gal4-uasKaede	1.2786	Glyt2-GFP	1.2374	Anti-5HT	1.0774
Rhombencephalon - Rhombomere 5	668.791	Anti-GlyR	2.002	6.7FRhcrtR-Gal4-uasKaede	1.852	Anti-Znp1(Synaptotagmin2)	1.8051	Anti-Zrf2	1.5477	Anti-Zn1	1.5417
Rhombencephalon - Spiral Fiber Neuron Anterior cluster	667.667	6.7FRhcrtR-Gal4-uasKaede	5.317	SpinalBackfills	1.5408	Elavl3-H2BRFP	1.2468	Qrfp-GFP	1.0642	Hcrt-RFP	1.0495
Rhombencephalon - MiR2	664.859	SpinalBackfills	3.9044	Elavl3-H2BRFP	1.8715	EtVmat2-GFP	1.1657	Anti-GlyR	1.0308	Vglut2a-GFP	0.97137
Rhombencephalon - Anterior Cluster of nV Trigeminal Motorneurons	658.202	Isl1-GFP	1.8761	Elavl3-H2BRFP	1.246	Qrfp-GFP	0.97101	Oxtl-GFP	0.96731	SpinalBackfills	0.95196
Diencephalon - Hypothalamus - Caudal Hypothalamus Neural Cluster	640.845	Anti-5HT	2.665	EtVmat2-GFP	2.0581	Anti-GlyR	1.7461	Anti-Zrf2	1.3125	Ptf1aGal4-uasKaede	1.3074
Rhombencephalon - MiV1	636.943	SpinalBackfills	3.9835	Elavl3-H2BRFP	1.6498	Anti-GlyR	1.6222	Anti-Znp1(Synaptotagmin2)	1.4401	Anti-Zn1	1.2294
Rhombencephalon - 6.7FDhcrtR-Gal4 Cluster 1	597.881	6.7FRhcrtR-Gal4-uasKaede	2.0526	Elavl3-H2BRFP	1.6225	Oxtl-GFP	0.95732	Glyt2-GFP	0.91046	Anti-tERK	0.90226
Rhombencephalon - MiV2	566.071	SpinalBackfills	4.1128	Elavl3-H2BRFP	2.1941	Isl2bGal4-uasDendra	1.0645	Anti-GlyR	1.0554	Hcrt-RFP	1.0489
Diencephalon - Hypothalamus Vglut2 Cluster 4	565.549	Vglut2a-GFP	1.8739	Elavl3-H2BRFP	1.3079	Gad1b-GFP	1.1513	Anti-TH	1.1423	Anti-tERK	1.1362
Rhombencephalon - RoM3	558.838	SpinalBackfills	5.2836	6.7FRhcrtR-Gal4-uasKaede	2.2414	Elavl3-H2BRFP	1.2507	Anti-GlyR	1.2409	Hcrt-RFP	1.0487
Rhombencephalon - Medial Vestibular Nucleus	513.299	6.7FRhcrtR-Gal4-uasKaede	2.4847	Elavl3-H2BRFP	1.3304	Qrfp-GFP	1.3136	SpinalBackfills	1.1343	Anti-GlyR	1.1331
Rhombencephalon - Gad1b Cluster 11	449.731	Elavl3-H2BRFP	1.9055	Gad1b-GFP	1.3812	Anti-tERK	0.9943	Vglut2a-GFP	0.99417	Qrfp-GFP	0.95816
Rhombencephalon - MiR1	448.174	SpinalBackfills	3.937	Elavl3-H2BRFP	1.5947	Oxtl-GFP	0.98464	Isl2bGal4-uasDendra	0.95319	Hcrt-RFP	0.9517
Rhombencephalon - VII Facial Motor and octavolateralis efferent neurons	439.42	Isl1-GFP	2.262	Elavl3-H2BRFP	1.1839	EtVmat2-GFP	1.0027	Oxtl-GFP	0.95173	Qrfp-GFP	0.94037
Rhombencephalon - Vmat2 Cluster 3	421.19	6.7FRhcrtR-Gal4-uasKaede	2.6831	Elavl3-H2BRFP	1.6281	EtVmat2-GFP	1.3969	Oxtl-GFP	0.95655	Anti-tERK	0.89752
Rhombencephalon - Gad1b Cluster 10	420.418	Elavl3-H2BRFP	1.8027	SpinalBackfills	1.6948	EtVmat2-GFP	1.1045	Vglut2a-GFP	1.0404	Qrfp-GFP	0.95679
Rhombencephalon - MiD3	416.621	SpinalBackfills	5.1496	Isl1-GFP	1.8937	S1181tGal4-uasKaede	1.5809	Elavl3-H2BRFP	1.4997	Glyt2-GFP	1.3091
Diencephalon - Pituitary	396.912	Anti-Zrf1(GFAP)	1.3946	Vglut2a-GFP	1.3631	Oxtl-GFP	1.0979	Anti-TH	1.0871	Olig2-GFP	1.0627
Rhombencephalon - Vmat2 Cluster 5	388.984	EtVmat2-GFP	2.049	Isl1-GFP	1.143	Oxtl-GFP	0.96785	Anti-Zrf1(GFAP)	0.95848	Hcrt-RFP	0.95348
Spinal Cord - Vmat2 Stripe1	309.365	Elavl3-H2BRFP	2.8336	6.7FRhcrtR-Gal4-uasKaede	2.663	Gad1b-GFP	2.0428	Anti-GlyR	1.4433	Anti-5HT	1.3426
Rhombencephalon - Glyt2 Cluster 5	290.301	6.7FRhcrtR-Gal4-uasKaede	1.6578	Glyt2-GFP	1.5767	Elavl3-H2BRFP	1.4817	Qrfp-GFP	0.96117	Oxtl-GFP	0.95084
Rhombencephalon - Glyt2 Cluster 6	272.063	SpinalBackfills	2.2476	Elavl3-H2BRFP	1.6877	Glyt2-GFP	1.4524	Anti-Znp1(Synaptotagmin2)	1.3272	Anti-TH	1.2905
Rhombencephalon - MiT	253.063	Elavl3-H2BRFP	2.1088	SpinalBackfills	1.8296	Anti-Znp1(Synaptotagmin2)	1.4742	Anti-GlyR	1.2427	Hcrt-RFP	1.1927
Ganglia - Facial glossopharyngeal ganglion	190.97	Elavl3-H2BRFP	1.9652	Elavl3-GCaMP5G	1.0537	Oxtl-GFP	0.99777	Gad1b-GFP	0.99394	Isl2bGal4-uasDendra	0.97422
Rhombencephalon - RoV3	166.388	SpinalBackfills	1.9756	Anti-GlyR	1.5455	Anti-Znp1(Synaptotagmin2)	1.0797	Elavl3-GCaMP5G	1.0748	Elavl3-H2BRFP	1.0679
Rhombencephalon - 6.7FDhcrtR-Gal4 Cluster 3	164.937	Elavl3-H2BRFP	1.9817	6.7FRhcrtR-Gal4-uasKaede	1.7308	Anti-Znp1(Synaptotagmin2)	1.5006	Isl2bGal4-uasDendra	1.3814	Anti-5HT	1.3764
Rhombencephalon - Noradrendergic neurons of the Interfascicular and Vagal areas	132.099	Vglut2a-GFP	2.5327	EtVmat2-GFP	2.1005	Anti-5HT	2.0526	Elavl3-H2BRFP	1.99	Anti-Zrf1(GFAP)	1.7745
Rhombencephalon - Vglut2 cluster 3	14.4134	Isl1-GFP	2.5472	Elavl3-H2BRFP	1.4311	Vglut2a-GFP	1.0919	Oxtl-GFP	0.95991	Anti-tERK	0.95146
Spinal Cord - Glyt2 Stripe	9.8787	Elavl3-H2BRFP	2.8766	6.7FRhcrtR-Gal4-uasKaede	2.1271	Gad1b-GFP	2.1083	Anti-GlyR	1.9059	Elavl3-GCaMP5G	1.7851
Spinal Cord - Neurons with descending projections labelled by spinal backfills	3.3895	Elavl3-H2BRFP	3.0312	Anti-GlyR	1.9082	Anti-Zn1	1.6935	Vglut2a-GFP	1.6123	Elavl3-GCaMP5G	1.4923

## Sheet: Z-BrainQuant_RedTuning
ROI name	Signal in ROI	Top Label	Signal	2nd Label	Signal	3rd Label	Signal	4th Label	Signal	5th Label	Signal
Rhombencephalon - Otpb Cluster 4	5444.46	Anti-Zn1	1.2765	Anti-Zrf1(GFAP)	1.2283	Otpb.A-Gal4-UAS-GCaMP_6	1.2171	Oxtl-GFP	0.98847	Anti-Gad67	0.97239
Rhombencephalon - Vglut2 cluster 1	4196.53	Anti-tERK	1.0001	Vglut2a-GFP	0.99218	Oxtl-GFP	0.97079	S1181tGal4-uasKaede	0.94621	Elavl3-H2BRFP	0.91423
Rhombencephalon - Isl1 Cluster 1	3391.03	Isl1-GFP	1.835	S1181tGal4-uasKaede	1.4175	6.7FRhcrtR-Gal4-uasKaede	1.1515	Glyt2-GFP	1.1384	Anti-5HT	1.0083
Rhombencephalon - Isl1 Cluster 2	3033.03	Isl1-GFP	1.6425	Anti-Zrf1(GFAP)	1.2363	Anti-Zn1	1.1246	Oxtl-GFP	0.97521	Hcrt-RFP	0.92252
Rhombencephalon - Glyt2 Cluster 5	2926.85	6.7FRhcrtR-Gal4-uasKaede	1.6696	Glyt2-GFP	1.5685	Elavl3-H2BRFP	1.4532	Qrfp-GFP	0.96876	Oxtl-GFP	0.95059
Rhombencephalon - Vglut2 cluster 3	2880.89	Vglut2a-GFP	1.4053	Isl1-GFP	1.3382	Elavl3-H2BRFP	1.3378	EtVmat2-GFP	1.1004	Oxtl-GFP	0.95561
Rhombencephalon - VII Facial Motor and octavolateralis efferent neurons	2792.91	Isl1-GFP	2.1708	Elavl3-H2BRFP	1.2675	Oxtl-GFP	0.95393	Hcrt-RFP	0.95062	Qrfp-GFP	0.94955
Rhombencephalon - Inferior Olive	2542.84	Elavl3-H2BRFP	3.932	Vglut2a-GFP	3.1535	Ptf1aGal4-uasKaede	3.0093	Elavl3-GCaMP5G	1.8683	Anti-Zn1	1.7982
Rhombencephalon - Vmat2 Cluster 5	2536.59	EtVmat2-GFP	2.2003	Elavl3-H2BRFP	1.1138	Isl1-GFP	1.0069	Oxtl-GFP	0.96422	Hcrt-RFP	0.94019
Rhombencephalon - Gad1b Cluster 10	2485.96	Elavl3-H2BRFP	1.7806	SpinalBackfills	1.5984	EtVmat2-GFP	1.1076	Vglut2a-GFP	0.99761	Qrfp-GFP	0.96062
Rhombencephalon - Glyt2 Stripe 3	1790.27	Glyt2-GFP	1.7342	Elavl3-H2BRFP	1.4911	Anti-Zn1	1.0936	Anti-tERK	0.95935	Oxtl-GFP	0.94871
Rhombencephalon - Gad1b Stripe 3	1688.65	Elavl3-H2BRFP	1.3498	Vglut2a-GFP	1.2596	Oxtl-GFP	0.93182	Qrfp-GFP	0.90143	Hcrt-RFP	0.87218
Rhombencephalon - RoV3	1682.76	SpinalBackfills	2.1333	Anti-GlyR	1.4629	Elavl3-H2BRFP	1.0842	Elavl3-GCaMP5G	1.069	Anti-Znp1(Synaptotagmin2)	1.0455
Rhombencephalon - Medial Vestibular Nucleus	1623.2	6.7FRhcrtR-Gal4-uasKaede	2.3267	Elavl3-H2BRFP	1.3909	Qrfp-GFP	1.2706	Hcrt-RFP	1.0713	Anti-GlyR	1.0525
Rhombencephalon - Gad1b Stripe 1	1609.16	Gad1b-GFP	3.1682	Elavl3-H2BRFP	1.7039	Elavl3-GCaMP5G	1.596	Anti-5HT	1.3901	EtVmat2-GFP	1.1285
Rhombencephalon - Glyt2 Cluster 4	1570.91	SpinalBackfills	2.0893	Glyt2-GFP	1.7489	Elavl3-H2BRFP	1.4756	6.7FRhcrtR-Gal4-uasKaede	1.0696	S1181tGal4-uasKaede	1.0168
Rhombencephalon - 6.7FDhcrtR-Gal4 Cluster 3	1494.61	Elavl3-H2BRFP	1.8956	6.7FRhcrtR-Gal4-uasKaede	1.5977	Anti-Znp1(Synaptotagmin2)	1.4327	Isl2bGal4-uasDendra	1.315	Elavl3-GCaMP5G	1.3148
Rhombencephalon - MiT	1484.21	Elavl3-H2BRFP	2.1858	SpinalBackfills	1.8684	Anti-Znp1(Synaptotagmin2)	1.5852	Anti-GlyR	1.3371	Hcrt-RFP	1.2093
Rhombencephalon - Vglut2 Stripe 3	1441.49	Elavl3-H2BRFP	1.4288	Glyt2-GFP	1.07	Anti-Zn1	0.96631	Oxtl-GFP	0.9467	Anti-tERK	0.9102
Rhombencephalon - MiD3	1321.88	SpinalBackfills	5.0114	Isl1-GFP	1.8998	S1181tGal4-uasKaede	1.5153	Elavl3-H2BRFP	1.3994	Anti-GlyR	1.2663
Rhombencephalon - MiR1	1318.9	SpinalBackfills	3.2896	Elavl3-H2BRFP	1.5519	Oxtl-GFP	0.98459	Gad1b-GFP	0.96383	Isl2bGal4-uasDendra	0.96
Rhombencephalon - Gad1b Cluster 11	1242.62	Elavl3-H2BRFP	2.0235	Gad1b-GFP	1.3659	Vglut2a-GFP	1.0615	Anti-tERK	0.99688	Elavl3-GCaMP5G	0.96479
Rhombencephalon - Gad1b Cluster 16	1227.83	Isl1-GFP	1.5456	Elavl3-H2BRFP	1.2709	Gad1b-GFP	1.2065	Oxtl-GFP	0.96446	Qrfp-GFP	0.90735
Rhombencephalon - MiR2	1192.49	SpinalBackfills	3.6681	Elavl3-H2BRFP	1.9538	EtVmat2-GFP	1.0441	Anti-GlyR	0.97448	Oxtl-GFP	0.96681
Rhombencephalon - MiV1	1171.68	SpinalBackfills	4.0808	Elavl3-H2BRFP	1.649	Anti-GlyR	1.5362	Anti-Znp1(Synaptotagmin2)	1.3557	Anti-Zn1	1.2246
Rhombencephalon - Glyt2 Cluster 6	1170.96	SpinalBackfills	2.2469	Elavl3-H2BRFP	1.7454	Glyt2-GFP	1.4659	Anti-Znp1(Synaptotagmin2)	1.3406	Anti-TH	1.2572
Rhombencephalon - MiD2	1062.23	SpinalBackfills	5.6767	Elavl3-H2BRFP	1.3538	Anti-GlyR	1.2582	Isl2bGal4-uasDendra	1.2369	Elavl3-GCaMP5G	1.1175
Rhombencephalon - Anterior Cluster of nV Trigeminal Motorneurons	1054.43	Isl1-GFP	1.9671	Elavl3-H2BRFP	1.2347	Qrfp-GFP	0.99529	Oxtl-GFP	0.96863	Hcrt-RFP	0.94617
Rhombencephalon - MiM1	947.154	SpinalBackfills	5.6477	S1181tGal4-uasKaede	1.4311	Anti-Zrf1(GFAP)	1.2301	Anti-Zn1	1.2269	Oxtl-GFP	1.1318
Rhombencephalon - Glyt2 Cluster 1	922.807	Glyt2-GFP	1.512	S1181tGal4-uasKaede	1.4891	Elavl3-H2BRFP	1.4132	6.7FRhcrtR-Gal4-uasKaede	1.2022	Oxtl-GFP	0.96125
Rhombencephalon - Rhombomere 3	914.989	Anti-GlyR	1.6986	Anti-Znp1(Synaptotagmin2)	1.3705	Anti-Zrf2	1.2359	SpinalBackfills	1.2161	Anti-Zn1	1.1991
Rhombencephalon - 6.7FDhcrtR-Gal4 Cluster 1	897.503	6.7FRhcrtR-Gal4-uasKaede	1.9252	Elavl3-H2BRFP	1.5653	Oxtl-GFP	0.95542	Glyt2-GFP	0.91001	Anti-tERK	0.89185
Rhombencephalon - Rhombomere 2	889.925	Vglut2a-GFP	1.5752	Anti-5HT	1.519	Anti-GlyR	1.457	S1181tGal4-uasKaede	1.4299	Ptf1aGal4-uasKaede	1.373
Rhombencephalon - Vglut2 Stripe 4	871.875	Vglut2a-GFP	1.5545	Elavl3-H2BRFP	1.3791	SpinalBackfills	1.1226	S1181tGal4-uasKaede	1.0138	Oxtl-GFP	0.94257
Rhombencephalon - Glyt2 Cluster 8	869.141	SpinalBackfills	1.2527	EtVmat2-GFP	1.1658	Glyt2-GFP	1.132	Oxtl-GFP	1.0778	Anti-Zrf1(GFAP)	1.0755
Rhombencephalon - Glyt2 Stripe 1	863.611	Gad1b-GFP	2.6487	Elavl3-GCaMP5G	1.5866	Elavl3-H2BRFP	1.4192	Ptf1aGal4-uasKaede	1.2484	Glyt2-GFP	1.1613
Rhombencephalon - Rhombomere 6	820.195	Vglut2a-GFP	3.3469	Elavl3-H2BRFP	2.0922	Anti-Zn1	1.9635	Anti-Znp1(Synaptotagmin2)	1.9194	Elavl3-GCaMP5G	1.8717
Rhombencephalon - MiV2	775.096	SpinalBackfills	4.199	Elavl3-H2BRFP	2.1271	Hcrt-RFP	1.0438	Anti-tERK	1.0307	Isl2bGal4-uasDendra	1.0024
Rhombencephalon - 6.7FDhcrtR-Gal4 Stripe 3	756.592	6.7FRhcrtR-Gal4-uasKaede	2.285	Vglut2a-GFP	1.55	Elavl3-H2BRFP	1.1339	S1181tGal4-uasKaede	1.1118	Elavl3-GCaMP5G	1.0267
Rhombencephalon - VII' Facial Motor and octavolateralis efferent neurons	725.206	Elavl3-H2BRFP	1.588	Vglut2a-GFP	1.5031	Isl1-GFP	1.309	S1181tGal4-uasKaede	1.2535	Isl2bGal4-uasDendra	1.0919
Rhombencephalon - Rhombomere 5	697.73	Anti-GlyR	2.0015	6.7FRhcrtR-Gal4-uasKaede	1.9462	Anti-Znp1(Synaptotagmin2)	1.8573	Anti-Zn1	1.6623	Anti-Zrf2	1.555
Rhombencephalon - Gad1b Cluster 9	639.099	EtVmat2-GFP	1.6233	Anti-Zrf1(GFAP)	1.2763	Anti-Zn1	1.1215	Oxtl-GFP	1.081	Elavl3-GCaMP5G	1.0658
Rhombencephalon - Vmat2 Cluster 2	634.721	EtVmat2-GFP	2.7624	Elavl3-H2BRFP	1.6184	S1181tGal4-uasKaede	1.2081	Glyt2-GFP	1.0314	Oxtl-GFP	0.94265
Rhombencephalon - Glyt2 Cluster 7	578.949	Anti-Zrf1(GFAP)	1.3986	Glyt2-GFP	1.2229	Anti-Zn1	1.1575	Oxtl-GFP	1.0992	Isl2bGal4-uasDendra	1.0425
Diencephalon - Left Habenula Vglut2 Cluster	564.219	Vglut2a-GFP	4.8266	Elavl3-H2BRFP	1.7956	Anti-Zrf1(GFAP)	1.6814	Elavl3-GCaMP5G	1.3871	Anti-5HT	1.3207
Rhombencephalon - Gad1b Stripe 2	548.577	6.7FRhcrtR-Gal4-uasKaede	1.5971	Elavl3-H2BRFP	1.5822	Gad1b-GFP	1.1035	Oxtl-GFP	0.94938	Anti-tERK	0.92544
Rhombencephalon - Vmat2 Cluster 3	544.317	6.7FRhcrtR-Gal4-uasKaede	2.5843	Elavl3-H2BRFP	1.621	EtVmat2-GFP	1.4525	Oxtl-GFP	0.95545	Anti-tERK	0.9102
Rhombencephalon - Olig2 Stripe	513.764	EtVmat2-GFP	1.8422	Pet1-GFP	1.6858	Elavl3-GCaMP5G	1.5344	Anti-Zrf1(GFAP)	1.5075	Olig2-GFP	1.4611
Rhombencephalon - Gad1b Cluster 15	477.448	Elavl3-H2BRFP	1.6763	Glyt2-GFP	1.3995	EtVmat2-GFP	1.3749	S1181tGal4-uasKaede	1.0488	Ptf1aGal4-uasKaede	0.96678
Mesencephalon - Isl1 cluster of the mesencephalic region	472.387	Elavl3-GCaMP5G	1.6201	Gad1b-GFP	1.4718	Elavl3-H2BRFP	1.4468	Vglut2a-GFP	1.3617	Anti-Zrf1(GFAP)	1.1862
Rhombencephalon - Gad1b Cluster 8	449.176	Elavl3-H2BRFP	1.218	Gad1b-GFP	1.1813	Pet1-GFP	1.1776	EtVmat2-GFP	1.0517	Vglut2a-GFP	1.0241
Rhombencephalon - Olig2 enriched areas in cerebellum	443.372	Olig2-GFP	2.4138	Gad1b-GFP	2.2858	Ptf1aGal4-uasKaede	1.9069	EtVmat2-GFP	1.754	Vglut2a-GFP	1.5376
Diencephalon - Right Habenula Vglut2 Cluster	440.639	Vglut2a-GFP	5.3129	Anti-Zrf1(GFAP)	1.7961	Anti-Zn12(Hnk-1)	1.6587	Elavl3-H2BRFP	1.6365	Anti-5HT	1.3703
Rhombencephalon -	438.255	Anti-GlyR	3.3709	Anti-Zn1	2.5607	Anti-5HT	2.5294	Elavl3-H2BRFP	2.2639	Anti-Znp1(Synaptotagmin2)	2.1553
Rhombencephalon - Isl1 Stripe 1	433.838	Elavl3-H2BRFP	1.6359	Gad1b-GFP	1.1298	Glyt2-GFP	1.0318	Isl1-GFP	1.02	Oxtl-GFP	0.89265
Rhombencephalon - 6.7FDhcrtR-Gal4 Stripe 1	426.452	Gad1b-GFP	3.2736	6.7FRhcrtR-Gal4-uasKaede	1.8493	Elavl3-H2BRFP	1.7151	Elavl3-GCaMP5G	1.2018	Anti-5HT	1.1772
Rhombencephalon - Rhombomere 4	422.123	Anti-GlyR	1.8637	SpinalBackfills	1.5655	Anti-Znp1(Synaptotagmin2)	1.5498	Anti-Zn1	1.4146	S1181tGal4-uasKaede	1.4138
Rhombencephalon - Otpb Cluster 2 - locus coeruleus	419.228	Otpb.A-Nsfb-GFP	2.9385	EtVmat2-GFP	2.7204	Anti-TH	2.0374	Elavl3-H2BRFP	1.7698	Hcrt-RFP	1.3431
Mesencephalon - Torus Longitudinalis	418.953	Anti-Zrf1(GFAP)	2.1144	Elavl3-H2BRFP	1.9677	Anti-Zrf2	1.8486	Elavl3-GCaMP5G	1.8431	S1181tGal4-uasKaede	1.7847
Rhombencephalon - RoM3	405.432	SpinalBackfills	5.3612	6.7FRhcrtR-Gal4-uasKaede	2.2009	Anti-GlyR	1.3281	Elavl3-H2BRFP	1.1767	Anti-Znp1(Synaptotagmin2)	1.1337
Diencephalon - Habenula	404.469	Vglut2a-GFP	4.9179	Anti-Zrf1(GFAP)	2.1719	Elavl3-H2BRFP	2.0293	Anti-Zn12(Hnk-1)	1.7256	Anti-5HT	1.6142
Rhombencephalon - Oxtl Cluster 1 Sparse	402.87	Gad1b-GFP	1.3441	Oxtl-GFP	1.064	Elavl3-H2BRFP	1.0486	Qrfp-GFP	0.90294	Hcrt-RFP	0.88009
Rhombencephalon - Gad1b Cluster 2	400.129	Gad1b-GFP	1.3595	Elavl3-H2BRFP	1.0012	Oxtl-GFP	0.9862	Qrfp-GFP	0.87584	Hcrt-RFP	0.86207
Rhombencephalon - Oculomotor Nucleus nIV	399.318	Isl1-GFP	2.6502	6.7FRhcrtR-Gal4-uasKaede	1.9411	Anti-Znp1(Synaptotagmin2)	1.8208	Anti-Zn1	1.2145	Anti-GlyR	1.1328
Rhombencephalon - Vmat2 Cluster 4	377.835	EtVmat2-GFP	2.5294	6.7FRhcrtR-Gal4-uasKaede	1.8933	Elavl3-H2BRFP	1.7648	Vglut2a-GFP	1.4364	SpinalBackfills	1.0448
Rhombencephalon - Glyt2 Stripe 2	371.58	Elavl3-H2BRFP	1.3778	Glyt2-GFP	1.307	Isl1-GFP	1.1052	Gad1b-GFP	1.0115	Oxtl-GFP	0.95252
Rhombencephalon - S1181t Cluster	360.536	Vglut2a-GFP	2.4012	S1181tGal4-uasKaede	2.2692	Elavl3-H2BRFP	1.703	Anti-5HT	1.1702	EtVmat2-GFP	1.0499
Rhombencephalon - Vglut2 Stripe 2	356.758	EtVmat2-GFP	1.6291	Gad1b-GFP	1.5898	Elavl3-H2BRFP	1.3042	Glyt2-GFP	1.1345	Isl1-GFP	1.1105
Rhombencephalon - Vmat2 Stripe2	355.791	EtVmat2-GFP	1.8527	Gad1b-GFP	1.7943	Elavl3-H2BRFP	1.36	Isl1-GFP	1.1512	Anti-5HT	1.09
Rhombencephalon - Otpb Cluster 6	336.476	Elavl3-H2BRFP	1.605	6.7FRhcrtR-Gal4-uasKaede	1.5191	SpinalBackfills	1.1471	Gad1b-GFP	0.98805	Elavl3-GCaMP5G	0.9869
Rhombencephalon - Spiral Fiber Neuron Anterior cluster	299.537	6.7FRhcrtR-Gal4-uasKaede	4.9322	Elavl3-H2BRFP	1.2015	Qrfp-GFP	1.0985	Hcrt-RFP	1.0699	SpinalBackfills	1.0589
Rhombencephalon - Gad1b Cluster 4	291	Elavl3-H2BRFP	1.4325	Gad1b-GFP	1.2887	Ptf1aGal4-uasKaede	1.0134	Oxtl-GFP	0.95104	S1181tGal4-uasKaede	0.94778
Rhombencephalon - Rhombomere 7	289.155	Gad1b-GFP	4.2392	Anti-GlyR	3.1943	Elavl3-GCaMP5G	3.0215	Elavl3-H2BRFP	2.8339	Anti-Zrf2	2.7689
Telencephalon - Subpallial dopaminergic cluster	284.031	EtVmat2-GFP	2.1938	Gad1b-GFP	1.8416	Elavl3-H2BRFP	1.6459	Anti-5HT	0.98339	Anti-TH	0.96879
Rhombencephalon - Gad1b Cluster 1	271.809	Gad1b-GFP	1.829	Oxtl-GFP	0.98428	Anti-tERK	0.93212	Qrfp-GFP	0.91967	Hcrt-RFP	0.91116
Rhombencephalon - Locus Coreuleus	265.156	EtVmat2-GFP	2.0791	Otpb.A-Nsfb-GFP	1.7943	Elavl3-H2BRFP	1.7505	Anti-TH	1.6444	Vglut2a-GFP	1.2932
Rhombencephalon - Mauthner Cell Axon Cap	264.14	6.7FRhcrtR-Gal4-uasKaede	4.8658	Anti-Znp1(Synaptotagmin2)	2.7224	Anti-Zn1	1.661	Hcrt-RFP	1.3249	Oxtl-GFP	1.2849
Rhombencephalon - Ptf1a Stripe	262.866	Gad1b-GFP	3.3303	Elavl3-GCaMP5G	1.6834	Elavl3-H2BRFP	1.6272	Ptf1aGal4-uasKaede	1.4531	Anti-5HT	1.3563
Rhombencephalon - RoM1	256.621	SpinalBackfills	1.9652	Elavl3-H2BRFP	1.348	Gad1b-GFP	1.0357	Hcrt-RFP	0.97816	Isl2bGal4-uasDendra	0.97382
Rhombencephalon - Raphe - Inferior	245.364	EtVmat2-GFP	3.4575	Pet1-GFP	3.4264	Elavl3-H2BRFP	1.6736	Olig2-GFP	1.4393	Elavl3-GCaMP5G	1.32
Diencephalon - Isl1 cluster 1	244.561	Gad1b-GFP	2.1751	Elavl3-H2BRFP	1.8824	Oxtl-GFP	1.3137	Elavl3-GCaMP5G	1.2239	Vglut2a-GFP	1.0675
Telencephalon - Subpallial Otpb Cluster 2	243.078	Gad1b-GFP	2.618	Elavl3-H2BRFP	1.7307	Elavl3-GCaMP5G	1.4393	Isl1-GFP	1.3286	Anti-5HT	1.2149
Rhombencephalon - Spiral Fiber Neuron Posterior cluster	238.921	6.7FRhcrtR-Gal4-uasKaede	4.4356	SpinalBackfills	3.0654	Isl1-GFP	1.5239	Elavl3-H2BRFP	1.2798	Qrfp-GFP	1.1831
Rhombencephalon - Lobus caudalis cerebelli	237.486	Anti-Zn1	1.8807	Isl1-GFP	1.6105	Olig2-GFP	1.5761	Otpb.A-Gal4-UAS-GCaMP_6	1.5664	Pet1-GFP	1.5614
Telencephalon - Olfactory Bulb	237.256	Vglut2a-GFP	5.1755	Elavl3-H2BRFP	3.0215	Anti-Zrf1(GFAP)	3.0018	Elavl3-GCaMP5G	2.8641	Anti-Zn12(Hnk-1)	2.6804
Rhombencephalon - Gad1b Cluster 17	235.434	Gad1b-GFP	1.4246	Elavl3-H2BRFP	1.0691	EtVmat2-GFP	1.0153	Isl2bGal4-uasDendra	0.98372	Oxtl-GFP	0.97239
Rhombencephalon - Lateral Reticular Nucleus	234.4	Anti-Zrf1(GFAP)	3.0348	Ptf1aGal4-uasKaede	2.2681	Anti-Zn1	1.8642	Anti-5HT	1.7321	Vglut2a-GFP	1.549
Telencephalon - S1181t Cluster	232.977	Gad1b-GFP	2.4297	Elavl3-H2BRFP	1.7896	Elavl3-GCaMP5G	1.3283	Isl1-GFP	1.1237	Anti-5HT	1.1097
Mesencephalon - Otpb Cluster	224.48	Isl1-GFP	2.1719	Otpb.A-Nsfb-GFP	1.7216	Anti-GlyR	1.1833	Elavl3-H2BRFP	1.1546	EtVmat2-GFP	1.1396
Rhombencephalon - Cerebellum Gad1b Enriched Areas	223.854	Ptf1aGal4-uasKaede	4.0557	Gad1b-GFP	3.1454	Olig2-GFP	2.9369	EtVmat2-GFP	2.5319	Otpb.A-Gal4-UAS-GCaMP_6	2.2596
Rhombencephalon - Neuropil Region 6	220.395	Isl2bGal4-uasDendra	1.219	Anti-Zrf2	1.0779	Gad1b-GFP	1.0652	Anti-Gad67	1.0228	Anti-tERK	1.0221
Spinal Cord - 6.7FDhcrtR-Gal4 Stripe	220.066	Elavl3-H2BRFP	2.3606	6.7FRhcrtR-Gal4-uasKaede	2.1933	Gad1b-GFP	1.7188	Elavl3-GCaMP5G	1.5977	Anti-Zrf2	1.3912
Rhombencephalon - CaD	217.232	SpinalBackfills	6.5245	Elavl3-H2BRFP	1.9212	Vglut2a-GFP	1.5851	Gad1b-GFP	1.2917	Isl2bGal4-uasDendra	1.1681
Diencephalon - Pineal Vmat2 cluster	197.717	EtVmat2-GFP	5.1918	Glyt2-GFP	5.0366	Anti-TH	4.7512	Anti-5HT	3.3486	S1181tGal4-uasKaede	3.3174
Telencephalon - Vmat2 cluster	197.378	EtVmat2-GFP	2.8624	Gad1b-GFP	1.836	Elavl3-H2BRFP	1.7347	Anti-Zn1	1.1485	Anti-tERK	1.1371
Rhombencephalon - Vmat2 Stripe1	195.629	Elavl3-H2BRFP	2.4013	Elavl3-GCaMP5G	2.068	Gad1b-GFP	2.0185	EtVmat2-GFP	2.0065	Anti-5HT	1.8696
Rhombencephalon - Corpus Cerebelli	194.111	Ptf1aGal4-uasKaede	2.496	EtVmat2-GFP	1.7724	Olig2-GFP	1.7648	Gad1b-GFP	1.6745	Anti-Zn12(Hnk-1)	1.4729
Rhombencephalon - Oxtl Cluster 2 Near MC axon cap	192.699	6.7FRhcrtR-Gal4-uasKaede	1.6655	Anti-Znp1(Synaptotagmin2)	1.6055	Anti-Zn1	1.5589	Oxtl-GFP	1.3414	Hcrt-RFP	1.1346
Rhombencephalon - 6.7FDhcrtR-Gal4 Stripe 4	188.859	6.7FRhcrtR-Gal4-uasKaede	2.7885	S1181tGal4-uasKaede	1.351	Vglut2a-GFP	1.2901	Elavl3-GCaMP5G	1.2546	Isl1-GFP	1.1722
Telencephalon - Pallium	186.03	Anti-tERK	3.9386	Vglut2a-GFP	3.4726	Anti-5HT	3.2677	Anti-Zrf2	3.1959	Anti-Zn1	2.6904
Rhombencephalon - Neuropil Region 5	184.113	Anti-GlyR	2.5207	Anti-Zrf2	2.0552	Anti-Znp1(Synaptotagmin2)	2.0158	Isl2bGal4-uasDendra	1.559	Anti-Zn1	1.5504
Telencephalon - Isl1 cluster 1	178.194	Gad1b-GFP	3.1356	Isl1-GFP	2.2998	Elavl3-H2BRFP	1.9956	Elavl3-GCaMP5G	1.9393	Anti-5HT	1.4764
Rhombencephalon - RoL-R1	177.638	SpinalBackfills	4.0021	Elavl3-H2BRFP	1.5883	Anti-TH	1.5877	Anti-GlyR	1.4041	6.7FRhcrtR-Gal4-uasKaede	1.3554
Diencephalon - Dopaminergic Cluster 1 - ventral thalamic and periventricular posterior tubercular DA neurons	175.772	Oxtl-GFP	2.5129	Elavl3-H2BRFP	2.2681	Gad1b-GFP	1.5969	Qrfp-GFP	1.2541	Hcrt-RFP	1.0187
Rhombencephalon - Posterior Cluster of nV Trigeminal Motorneurons	173.72	Isl1-GFP	3.0834	Anti-GlyR	1.6382	Anti-Znp1(Synaptotagmin2)	1.4761	Anti-Zrf2	1.3638	6.7FRhcrtR-Gal4-uasKaede	1.1853
Rhombencephalon - Rhombomere 1	169.087	Ptf1aGal4-uasKaede	2.1967	Olig2-GFP	1.5367	EtVmat2-GFP	1.5086	Gad1b-GFP	1.4884	Anti-5HT	1.3423
Mesencephalon - Vmat2 cluster2	167.68	Elavl3-H2BRFP	1.7177	Gad1b-GFP	1.6256	Oxtl-GFP	1.2646	Qrfp-GFP	1.1939	EtVmat2-GFP	1.0808
Diencephalon - Pretectal dopaminergic cluster	165.023	EtVmat2-GFP	2.0365	Elavl3-H2BRFP	1.4625	Gad1b-GFP	1.414	Anti-TH	1.3157	Qrfp-GFP	0.98697
Telencephalon - Vglut2 rind	164.89	Vglut2a-GFP	4.7095	Elavl3-H2BRFP	2.4063	Anti-5HT	2.3655	Elavl3-GCaMP5G	1.8198	Otpb.A-Gal4-UAS-GCaMP_6	1.7808
Rhombencephalon - Raphe - Superior	164.228	Anti-Zrf1(GFAP)	2.7906	EtVmat2-GFP	2.5705	Pet1-GFP	2.4579	Elavl3-H2BRFP	1.1031	Anti-5HT	1.0624
Rhombencephalon - Glyt2 Cluster 10	162	Anti-GlyR	1.6356	Elavl3-H2BRFP	1.4634	Anti-TH	1.3263	Anti-Znp1(Synaptotagmin2)	1.3237	Glyt2-GFP	1.3224
Telencephalon -	160.934	Anti-tERK	4.9781	Anti-Zrf2	4.4283	Anti-5HT	4.4098	Anti-Zn1	3.4563	Elavl3-GCaMP5G	3.3685
Rhombencephalon - Cerebellum	160.079	Ptf1aGal4-uasKaede	3.4947	Olig2-GFP	2.269	EtVmat2-GFP	2.0633	Gad1b-GFP	1.9358	Otpb.A-Gal4-UAS-GCaMP_6	1.8865
Mesencephalon - Oculomotor Nucleus nIII	159.778	Isl1-GFP	2.0356	Anti-Zrf1(GFAP)	1.8517	SpinalBackfills	1.686	6.7FRhcrtR-Gal4-uasKaede	1.5615	Anti-Znp1(Synaptotagmin2)	1.5479
Rhombencephalon - X Vagus motorneuron cluster	157.223	Isl1-GFP	2.0609	Gad1b-GFP	1.6994	Elavl3-H2BRFP	1.5742	Anti-5HT	1.126	Anti-GlyR	1.1163
Rhombencephalon - 6.7FDhcrtR-Gal4 Cluster 5	150.486	Vglut2a-GFP	1.8898	6.7FRhcrtR-Gal4-uasKaede	1.8826	EtVmat2-GFP	1.874	Elavl3-H2BRFP	1.7622	Gad1b-GFP	1.6675
Diencephalon - Oxtl Cluster 1 in Preoptic Area	149.248	Oxtl-GFP	6.2528	Elavl3-H2BRFP	2.1569	Gad1b-GFP	1.2064	Otpb.A-Nsfb-GFP	1.1905	Anti-GlyR	0.997
Rhombencephalon - Neuropil Region 3	148.947	Anti-GlyR	4.1802	Anti-Zrf2	4.1389	Anti-Znp1(Synaptotagmin2)	3.4116	Elavl3-GCaMP5G	2.5573	Anti-tERK	2.3659
Telencephalon - Subpallium	144.503	Gad1b-GFP	3.6309	Elavl3-H2BRFP	1.9314	EtVmat2-GFP	1.8405	Anti-5HT	1.645	Elavl3-GCaMP5G	1.6046
Telencephalon - Subpallial Gad1b cluster	143.917	Gad1b-GFP	3.8038	EtVmat2-GFP	1.8037	Elavl3-H2BRFP	1.7405	Elavl3-GCaMP5G	1.4208	Anti-5HT	1.3579
Diencephalon - Oxtl Cluster 2	143.886	Isl2bGal4-uasDendra	3.3845	Elavl3-H2BRFP	2.1032	Oxtl-GFP	1.6017	Anti-Zn1	1.4629	Anti-5HT	1.462
Diencephalon - Anterior pretectum cluster of vmat2 Neurons	143.267	EtVmat2-GFP	2.3113	Elavl3-H2BRFP	1.5141	Gad1b-GFP	1.3889	Anti-TH	1.0389	Elavl3-GCaMP5G	1.0378
Rhombencephalon - Isl1 Cluster 3	139.001	Vglut2a-GFP	1.6	Glyt2-GFP	1.0833	Elavl3-H2BRFP	1.0117	Oxtl-GFP	0.96563	Isl1-GFP	0.9308
Diencephalon - Pretectum	137.105	Anti-Zrf1(GFAP)	1.726	EtVmat2-GFP	1.5652	Elavl3-H2BRFP	1.3069	Gad1b-GFP	1.2559	Qrfp-GFP	1.0163
Rhombencephalon - CaV	135.144	SpinalBackfills	5.216	Anti-Znp1(Synaptotagmin2)	1.7639	Anti-GlyR	1.472	Isl2bGal4-uasDendra	1.4256	Vglut2a-GFP	1.3795
Diencephalon - Isl1 cluster 3	133.457	Elavl3-H2BRFP	2.0976	Qrfp-GFP	1.4733	Gad1b-GFP	1.3589	6.7FRhcrtR-Gal4-uasKaede	1.2634	Anti-TH	1.2219
Rhombencephalon - Glyt2 Cluster 2	133.254	EtVmat2-GFP	2.0648	Ptf1aGal4-uasKaede	1.7514	Elavl3-H2BRFP	1.5466	Glyt2-GFP	1.4423	Vglut2a-GFP	1.1493
Mesencephalon - Tectum Stratum Periventriculare	132.132	Elavl3-H2BRFP	3.4469	Elavl3-GCaMP5G	2.4058	Gad1b-GFP	2.2084	Vglut2a-GFP	2.1928	Anti-5HT	1.3989
Diencephalon - Hypothalamus Qrfp neuron cluster	130.631	Qrfp-GFP	12.8175	Hcrt-RFP	3.4428	Elavl3-H2BRFP	2.7226	S1181tGal4-uasKaede	1.9461	Anti-tERK	1.3727
Diencephalon - Pretectal Gad1b Cluster	129.604	EtVmat2-GFP	2.3846	Gad1b-GFP	2.2862	Elavl3-H2BRFP	1.2717	Anti-TH	1.2305	Elavl3-GCaMP5G	1.1635
Diencephalon - Otpb Cluster 2	129.01	Oxtl-GFP	6.9142	Elavl3-H2BRFP	1.8833	Otpb.A-Nsfb-GFP	1.3645	Gad1b-GFP	1.1175	Qrfp-GFP	0.89794
Diencephalon - Anterior group of the posterior tubercular vmat2 neurons	128.858	Hcrt-RFP	3.8215	EtVmat2-GFP	2.4065	Oxtl-GFP	2.3898	Elavl3-H2BRFP	2.1372	Qrfp-GFP	1.2034
Mesencephalon - Medial Tectal Band	127.405	Gad1b-GFP	2.0984	Elavl3-H2BRFP	1.3496	Anti-tERK	0.96496	Oxtl-GFP	0.94734	Qrfp-GFP	0.88824
Mesencephalon - Sparse 6.7FRhcrtR cluster	125.42	6.7FRhcrtR-Gal4-uasKaede	1.6114	Anti-GlyR	1.5371	Anti-Znp1(Synaptotagmin2)	1.4874	Elavl3-H2BRFP	1.3125	Qrfp-GFP	1.189
Rhombencephalon - RoM2	124.193	SpinalBackfills	4.1917	Elavl3-H2BRFP	1.5343	Isl1-GFP	1.4712	Anti-GlyR	1.1704	Hcrt-RFP	1.1241
Ganglia - Statoacoustic Ganglion	123.919	Elavl3-H2BRFP	2.5906	Anti-GlyR	1.3922	6.7FRhcrtR-Gal4-uasKaede	1.3836	Anti-Znp1(Synaptotagmin2)	1.2113	Anti-Zn1	1.1343
Diencephalon - Dorsal Thalamus	122.955	Elavl3-H2BRFP	1.1442	Vglut2a-GFP	0.99469	Elavl3-GCaMP5G	0.97181	Oxtl-GFP	0.95706	EtVmat2-GFP	0.89833
Mesencephalon - Tegmentum	121.383	Elavl3-H2BRFP	1.1646	Elavl3-GCaMP5G	1.1038	SpinalBackfills	1.101	Gad1b-GFP	1.0868	Anti-Zrf1(GFAP)	1.0712
Diencephalon - Hypothalamus s1181t Cluster	120.87	Qrfp-GFP	10.6198	Hcrt-RFP	5.3124	S1181tGal4-uasKaede	3.1013	Elavl3-H2BRFP	2.5497	Anti-Zrf2	1.4472
Rhombencephalon - Vglut2 Stripe 1	120.619	Vglut2a-GFP	5.9508	Elavl3-H2BRFP	3.0286	Elavl3-GCaMP5G	1.9606	Anti-5HT	1.8244	Pet1-GFP	1.5047
Rhombencephalon - Vmat2 Stripe3	118.286	EtVmat2-GFP	1.2729	Elavl3-H2BRFP	1.2383	Glyt2-GFP	0.98484	Oxtl-GFP	0.94984	Anti-Zn1	0.91416
Rhombencephalon - Caudal Ventral Cluster Labelled by Spinal Backfills	117.889	SpinalBackfills	1.8401	Vglut2a-GFP	1.4329	Elavl3-H2BRFP	1.3583	Isl2bGal4-uasDendra	1.2896	Anti-Zrf2	1.2078
Rhombencephalon - Mauthner	116.62	SpinalBackfills	5.5106	S1181tGal4-uasKaede	4.2104	Anti-GlyR	1.5534	Anti-Znp1(Synaptotagmin2)	1.3625	Isl2bGal4-uasDendra	1.222
Rhombencephalon - RoL3	116.05	SpinalBackfills	3.8166	Anti-Znp1(Synaptotagmin2)	1.813	Anti-Zrf2	1.495	Anti-GlyR	1.3732	6.7FRhcrtR-Gal4-uasKaede	1.2817
Mesencephalon - Oxtl Cluster Sparse	115.857	Anti-Zrf1(GFAP)	1.6755	Elavl3-H2BRFP	1.4239	Oxtl-GFP	1.0626	Elavl3-GCaMP5G	0.96931	Qrfp-GFP	0.95171
Rhombencephalon - Small cluster of TH stained neurons	113.512	EtVmat2-GFP	1.3407	Elavl3-H2BRFP	1.2512	Glyt2-GFP	1.1536	Gad1b-GFP	1.1307	Vglut2a-GFP	0.98203
Diencephalon - Oxtl Cluster 5	112.812	Oxtl-GFP	1.4528	Elavl3-H2BRFP	1.4019	EtVmat2-GFP	1.2035	Vglut2a-GFP	1.123	Glyt2-GFP	0.95352
Telencephalon - Subpallial Vglut2 Cluster	112.708	Vglut2a-GFP	3.7592	Elavl3-H2BRFP	3.1252	Anti-5HT	2.4861	Anti-tERK	2.1271	Elavl3-GCaMP5G	1.9581
Ganglia - Lateral Line Neuromast N	112.441	Anti-GlyR	NaN	Ptf1aGal4-uasKaede	2.7285	Olig2-GFP	2.642	Pet1-GFP	2.5396	Isl1-GFP	2.5392
Diencephalon - Posterior Tuberculum	111.208	Qrfp-GFP	2.4378	Elavl3-H2BRFP	1.9578	Hcrt-RFP	1.6036	6.7FRhcrtR-Gal4-uasKaede	1.1462	Gad1b-GFP	1.1237
Diencephalon - Hypothalamus Olig2 cluster	110.557	Elavl3-H2BRFP	3.0439	Olig2-GFP	2.3721	Vglut2a-GFP	1.9895	Isl1-GFP	1.7876	Anti-5HT	1.7597
Diencephalon - Otpb Cluster 4	110.083	Qrfp-GFP	2.7895	Elavl3-H2BRFP	2.743	Otpb.A-Gal4-UAS-GCaMP_6	1.717	Hcrt-RFP	1.5777	Oxtl-GFP	1.5451
Mesencephalon - Vglut2 cluster 1	109.392	Vglut2a-GFP	2.2726	SpinalBackfills	1.1218	Elavl3-H2BRFP	0.97484	Oxtl-GFP	0.96672	Hcrt-RFP	0.95532
Rhombencephalon - Cerebelluar-Vglut2 enriched areas	107.925	Vglut2a-GFP	2.3137	Elavl3-H2BRFP	1.1419	Elavl3-GCaMP5G	1.0516	EtVmat2-GFP	1.0234	Oxtl-GFP	0.98354
Ganglia - Olfactory Epithelium	106.385	Elavl3-H2BRFP	4.6993	Vglut2a-GFP	3.3183	Olig2-GFP	3.1759	Pet1-GFP	3.1668	Otpb.A-Gal4-UAS-GCaMP_6	3.1417
Diencephalon - Medial vglut2 cluster	106.331	Vglut2a-GFP	1.6493	Elavl3-H2BRFP	1.2563	Olig2-GFP	0.97706	Oxtl-GFP	0.93648	Hcrt-RFP	0.91019
Mesencephalon -	105.946	Isl2bGal4-uasDendra	11.9789	Elavl3-GCaMP5G	4.44	Gad1b-GFP	4.2157	Anti-Znp1(Synaptotagmin2)	3.8888	Anti-Zrf2	3.4419
Diencephalon - Ventral Thalamus	104.203	Gad1b-GFP	2.4478	Elavl3-H2BRFP	1.3109	Oxtl-GFP	0.92841	Elavl3-GCaMP5G	0.89096	Olig2-GFP	0.8653
Mesencephalon - NucMLF (nucleus of the medial longitudinal fascicle)	103.666	SpinalBackfills	4.6567	Anti-Znp1(Synaptotagmin2)	2.4391	6.7FRhcrtR-Gal4-uasKaede	2.3669	Anti-GlyR	1.9525	Anti-Zn1	1.3774
Rhombencephalon - Gad1b Cluster 13	101.513	Gad1b-GFP	2.5717	6.7FRhcrtR-Gal4-uasKaede	2.4438	Anti-Znp1(Synaptotagmin2)	2.2112	Anti-Zn1	1.9211	Anti-Gad67	1.863
Diencephalon - Pineal	100.108	Anti-TH	5.365	Glyt2-GFP	4.5379	EtVmat2-GFP	3.5246	S1181tGal4-uasKaede	3.267	Anti-5HT	3.1828
Diencephalon - Hypothalamus Vglut2 Cluster 6	99.488	Elavl3-H2BRFP	2.8865	Anti-5HT	2.1856	Anti-tERK	2.0171	Vglut2a-GFP	1.9023	Anti-Zn1	1.7402
Diencephalon - Hypothalamus Hcrt Neurons	97.6706	Hcrt-RFP	6.4425	Qrfp-GFP	5.4352	Elavl3-H2BRFP	2.4086	S1181tGal4-uasKaede	2.1362	EtVmat2-GFP	1.4069
Rhombencephalon - 6.7FDhcrtR-Gal4 Stripe 2	96.2191	6.7FRhcrtR-Gal4-uasKaede	2.7483	Elavl3-H2BRFP	2.1907	Vglut2a-GFP	1.7181	Anti-5HT	1.2794	Elavl3-GCaMP5G	1.2167
Ganglia - Trigeminal Ganglion	95.0484	Elavl3-H2BRFP	3.6884	Isl2bGal4-uasDendra	1.9288	Anti-Zn12(Hnk-1)	1.8932	Anti-TH	1.6969	Isl1-GFP	1.5654
Diencephalon - Hypothalamus 6.7FRhcrtR-Gal4 cluster 1	94.9771	6.7FRhcrtR-Gal4-uasKaede	3.5533	Elavl3-H2BRFP	2.4777	Qrfp-GFP	1.5753	Hcrt-RFP	1.187	Gad1b-GFP	1.0955
Diencephalon - Hypothamic VentroLateral VMAT cluster	92.3203	Elavl3-H2BRFP	2.8522	EtVmat2-GFP	1.5401	Vglut2a-GFP	1.5289	Anti-Zrf1(GFAP)	1.4907	Isl1-GFP	1.4701
Rhombencephalon - Ptf1a Cluster 1	91.7869	Ptf1aGal4-uasKaede	1.6971	Elavl3-H2BRFP	1.5147	Anti-5HT	1.1007	Qrfp-GFP	1.051	Gad1b-GFP	1.0459
Rhombencephalon - Gad1b Cluster 6	90.229	Elavl3-H2BRFP	1.5895	S1181tGal4-uasKaede	1.3538	Gad1b-GFP	1.1721	Qrfp-GFP	1.0689	Oxtl-GFP	0.96982
Diencephalon - Olig2 Band	90.1178	Olig2-GFP	2.0386	Oxtl-GFP	0.95423	Elavl3-H2BRFP	0.92395	Gad1b-GFP	0.88778	Vglut2a-GFP	0.88766
Diencephalon - Isl1 cluster 2	89.4211	Elavl3-H2BRFP	2.3606	Gad1b-GFP	1.8495	Oxtl-GFP	1.3841	Isl1-GFP	1.0252	Glyt2-GFP	0.90002
Rhombencephalon - 6.7FDhcrtR-Gal4 Cluster 2 Sparse	88.7193	Elavl3-H2BRFP	1.5616	6.7FRhcrtR-Gal4-uasKaede	1.3595	Ptf1aGal4-uasKaede	1.1569	Glyt2-GFP	1.0216	Oxtl-GFP	0.97263
Mesencephalon - Ptf1a Cluster	88.4064	Ptf1aGal4-uasKaede	1.9678	Elavl3-GCaMP5G	1.1853	Vglut2a-GFP	1.1391	EtVmat2-GFP	1.0952	Anti-Zrf1(GFAP)	0.98216
Rhombencephalon - Eminentia Granularis	87.3093	Ptf1aGal4-uasKaede	2.62	Anti-5HT	2.2757	Anti-Gad67	1.9611	Anti-Zn1	1.8646	Otpb.A-Gal4-UAS-GCaMP_6	1.8222
Telencephalon - Telencephalic Migrated Area 4 (M4)	87.1503	Anti-Zn1	2.9435	Anti-Zrf2	2.7911	Anti-5HT	2.2755	Anti-tERK	1.8748	Elavl3-GCaMP5G	1.586
Rhombencephalon - Glyt2 Cluster 3	85.13	Glyt2-GFP	2.145	Ptf1aGal4-uasKaede	2.0262	6.7FRhcrtR-Gal4-uasKaede	1.9725	Elavl3-H2BRFP	1.2784	S1181tGal4-uasKaede	1.1539
Diencephalon - Retinal Arborization Field 1 (AF1- Approximate Location)	83.5239	Isl2bGal4-uasDendra	3.5752	Anti-Zrf2	2.7453	Anti-Zn1	2.0803	Anti-5HT	1.9946	Anti-tERK	1.7286
Diencephalon - Dopaminergic Cluster 3 - hypothalamus	82.422	Hcrt-RFP	4.1222	EtVmat2-GFP	1.6891	Elavl3-H2BRFP	1.3707	Anti-5HT	1.2373	S1181tGal4-uasKaede	1.1822
Rhombencephalon - Gad1b Cluster 3	81.903	EtVmat2-GFP	2.3038	Pet1-GFP	1.8613	Gad1b-GFP	1.3624	Anti-TH	1.0447	Anti-tERK	0.97154
Rhombencephalon - Vglut2 cluster 2	81.3736	Vglut2a-GFP	3.243	Elavl3-H2BRFP	1.8596	S1181tGal4-uasKaede	1.6731	Anti-5HT	1.3568	Elavl3-GCaMP5G	1.0323
Diencephalon - Dopaminergic Cluster 2 - posterior tuberculum	79.1731	Qrfp-GFP	3.3215	Hcrt-RFP	2.5622	Elavl3-H2BRFP	2.1096	Anti-TH	1.8469	S1181tGal4-uasKaede	1.7594
Diencephalon -	78.8704	Vglut2a-GFP	1.4594	Elavl3-H2BRFP	1.3972	Qrfp-GFP	1.2936	Oxtl-GFP	1.2017	Anti-tERK	1.193
Diencephalon - Rostral Hypothalamus	77.4934	Qrfp-GFP	3.3977	Elavl3-H2BRFP	2.4162	Hcrt-RFP	2.1587	Anti-tERK	1.3174	S1181tGal4-uasKaede	1.1629
Diencephalon - Hypothalamus Gad1b Cluster 3 Sparse	76.6379	Elavl3-H2BRFP	2.0779	Anti-tERK	2.0563	Isl2bGal4-uasDendra	1.8961	Anti-Zrf2	1.8915	Anti-5HT	1.8496
Telencephalon - Olfactory bulb dopaminergic neuron areas	75.8346	Gad1b-GFP	3.4474	EtVmat2-GFP	2.66	Anti-Zn12(Hnk-1)	1.6406	Anti-tERK	1.6391	Anti-5HT	1.5878
Telencephalon - Olig2 Cluster	75.8161	Gad1b-GFP	2.4028	Olig2-GFP	1.3973	Elavl3-GCaMP5G	1.2303	Oxtl-GFP	0.94363	Qrfp-GFP	0.91104
Ganglia - Facial Sensory Ganglion	75.7962	Elavl3-H2BRFP	2.7699	Isl1-GFP	1.8827	Vglut2a-GFP	1.5748	S1181tGal4-uasKaede	1.5092	Isl2bGal4-uasDendra	1.3999
Rhombencephalon - Valvula Cerebelli	75.449	Ptf1aGal4-uasKaede	1.8262	Anti-Znp1(Synaptotagmin2)	1.3106	Vglut2a-GFP	1.1823	Olig2-GFP	1.1311	SpinalBackfills	1.0473
Diencephalon - Retinal Arborization Field 2 (AF2- Approximate Location)	75.0837	Isl2bGal4-uasDendra	11.834	Anti-Zn1	2.4955	Anti-Zrf2	2.3372	Anti-tERK	1.9342	Anti-5HT	1.9233
Diencephalon - Oxtl Cluster 3	73.9979	Oxtl-GFP	2.6552	Elavl3-H2BRFP	2.244	Hcrt-RFP	2.0063	Qrfp-GFP	1.7283	6.7FRhcrtR-Gal4-uasKaede	1.5568
Mesencephalon - Tecum Neuropil	73.9791	Isl2bGal4-uasDendra	16.5052	Anti-Znp1(Synaptotagmin2)	9.284	Anti-Zrf2	5.6872	Anti-Gad67	5.1118	Anti-GlyR	4.9502
Diencephalon - Olig2 Band 2	73.0254	Olig2-GFP	1.672	Gad1b-GFP	1.1152	Oxtl-GFP	0.99609	Vglut2a-GFP	0.93726	Qrfp-GFP	0.89856
Diencephalon - Eminentia Thalami	72.1914	Vglut2a-GFP	3.3612	Oxtl-GFP	2.3177	Elavl3-H2BRFP	1.3017	Anti-GlyR	1.276	Olig2-GFP	1.1795
Mesencephalon - Torus Semicircularis	70.7295	Anti-5HT	2.0084	Elavl3-H2BRFP	1.9614	Vglut2a-GFP	1.8492	Anti-Znp1(Synaptotagmin2)	1.8136	Gad1b-GFP	1.7786
Rhombencephalon - Neuropil Region 2	70.7192	Anti-Znp1(Synaptotagmin2)	5.0501	Anti-GlyR	4.975	Anti-Zrf2	3.5936	Isl2bGal4-uasDendra	3.5816	Elavl3-GCaMP5G	2.788
Rhombencephalon - Gad1b Cluster 12	70.3689	SpinalBackfills	4.2222	Gad1b-GFP	1.4295	Anti-GlyR	1.2504	6.7FRhcrtR-Gal4-uasKaede	1.1522	Anti-Znp1(Synaptotagmin2)	1.1298
Rhombencephalon - Gad1b Cluster 5	69.1972	Elavl3-H2BRFP	1.5047	Gad1b-GFP	1.2426	6.7FRhcrtR-Gal4-uasKaede	1.1275	S1181tGal4-uasKaede	0.99323	Oxtl-GFP	0.97132
Ganglia - Anterior Lateral Line Ganglion	69.1204	Elavl3-H2BRFP	3.1194	Anti-Zn12(Hnk-1)	1.8778	Isl2bGal4-uasDendra	1.6711	Anti-TH	1.4617	Elavl3-GCaMP5G	1.3364
Mesencephalon - Retinal Arborization Field 8 (AF8)	68.9621	EtVmat2-GFP	2.7644	Anti-Zrf2	2.5542	Isl2bGal4-uasDendra	2.2707	Anti-TH	1.8194	Anti-Zrf1(GFAP)	1.7565
Telencephalon - Isl1 cluster 2	68.0864	Gad1b-GFP	1.7734	Elavl3-H2BRFP	1.6985	Isl1-GFP	1.4933	Anti-Zrf2	1.2744	Anti-tERK	1.1746
Rhombencephalon - Qrfp neuron cluster sparse	67.7778	Vglut2a-GFP	4.8927	Elavl3-H2BRFP	2.4112	Anti-5HT	1.4659	Qrfp-GFP	1.3163	Elavl3-GCaMP5G	1.2565
Mesencephalon - Retinal Arborization Field 7 (AF7)	67.6736	Isl2bGal4-uasDendra	5.6806	Anti-GlyR	4.8241	Anti-Znp1(Synaptotagmin2)	4.57	Elavl3-GCaMP5G	3.1338	Anti-Zn1	2.8726
Diencephalon - Hypothalamus Olig2 cluster 2	66.7188	Vglut2a-GFP	1.8129	Anti-Zrf1(GFAP)	1.3424	Olig2-GFP	1.2938	Gad1b-GFP	1.0917	Oxtl-GFP	0.96917
Mesencephalon - Retinal Arborization Field 9 (AF9)	66.6057	Anti-Zrf2	2.6067	Isl2bGal4-uasDendra	1.9157	Elavl3-GCaMP5G	1.8795	Anti-GlyR	1.7388	EtVmat2-GFP	1.6951
Ganglia - Lateral Line Neuromast OC1	65.5826	Anti-Zrf1(GFAP)	3.3987	Anti-TH	2.3027	Pet1-GFP	2.1725	Otpb.A-Gal4-UAS-GCaMP_6	2.0453	Anti-Zn12(Hnk-1)	1.9944
Diencephalon - Torus Lateralis	65.3124	Elavl3-H2BRFP	2.6072	Vglut2a-GFP	1.9789	Anti-5HT	1.9643	Anti-tERK	1.7213	S1181tGal4-uasKaede	1.7052
Mesencephalon - Vmat2 cluster of paraventricular organ	64.7644	EtVmat2-GFP	1.9914	Anti-5HT	1.4023	Olig2-GFP	1.0256	Oxtl-GFP	1.0126	Glyt2-GFP	0.96065
Ganglia - Lateral Line Neuromast SO3	64.1938	Anti-Zrf1(GFAP)	4.4095	Olig2-GFP	2.7568	Isl1-GFP	2.7413	Anti-Zn12(Hnk-1)	2.7259	Pet1-GFP	2.4969
Diencephalon - Retinal Arborization Field 4 (AF4)	63.6754	Isl2bGal4-uasDendra	2.9154	Anti-Zrf2	2.1363	Anti-GlyR	2.1068	Anti-Gad67	1.9131	Anti-Znp1(Synaptotagmin2)	1.7882
Rhombencephalon - Gad1b Cluster 19	62.4634	Anti-GlyR	3.0366	S1181tGal4-uasKaede	2.9144	SpinalBackfills	2.5431	Anti-Znp1(Synaptotagmin2)	2.3893	Ptf1aGal4-uasKaede	2.1033
Rhombencephalon - 6.7FDhcrtR-Gal4 Cluster 4	62.3119	6.7FRhcrtR-Gal4-uasKaede	2.7323	Anti-Znp1(Synaptotagmin2)	2.4953	Gad1b-GFP	2.3723	Anti-Gad67	2.1205	Anti-Zn1	1.7962
Diencephalon - Preoptic area posterior dopaminergic cluster	61.7458	Elavl3-H2BRFP	2.6428	Isl2bGal4-uasDendra	2.5824	Gad1b-GFP	1.7845	Anti-TH	1.6374	Elavl3-GCaMP5G	1.4925
Rhombencephalon - Ventrolateral population of serotonergic neurons	61.3071	Anti-GlyR	1.7351	EtVmat2-GFP	1.4998	Anti-5HT	1.4269	Pet1-GFP	1.4045	Anti-Zrf2	1.2959
Ganglia - Lateral Line Neuromast SO1	60.9698	Olig2-GFP	2.741	Pet1-GFP	2.3249	6.7FRhcrtR-Gal4-uasKaede	2.231	Anti-Zrf1(GFAP)	2.1712	Isl1-GFP	2.1498
Ganglia - Vagal Ganglia	60.5183	Elavl3-H2BRFP	8.1085	Isl1-GFP	2.823	Anti-5HT	2.5092	Pet1-GFP	2.4547	Otpb.A-Gal4-UAS-GCaMP_6	2.1505
Rhombencephalon - Otpb Cluster 3	59.8847	Otpb.A-Nsfb-GFP	1.3605	S1181tGal4-uasKaede	1.2774	Oxtl-GFP	0.98361	Hcrt-RFP	0.9791	Qrfp-GFP	0.97207
Diencephalon - Hypothalamus 6.7FRhcrtR-Gal4 cluster 2	59.8825	Elavl3-H2BRFP	2.16	6.7FRhcrtR-Gal4-uasKaede	1.8485	Hcrt-RFP	1.2936	Oxtl-GFP	1.2702	Qrfp-GFP	1.2613
Rhombencephalon - Vglut2 cluster 4	59.4883	EtVmat2-GFP	2.4584	Elavl3-H2BRFP	1.7526	Pet1-GFP	1.6995	Vglut2a-GFP	1.3286	SpinalBackfills	1.2628
Rhombencephalon - Gad1b Cluster 7	59.2497	Ptf1aGal4-uasKaede	2.6595	Anti-5HT	2.3559	Anti-Gad67	2.2235	Anti-Zn1	1.9149	Otpb.A-Gal4-UAS-GCaMP_6	1.8991
Diencephalon - Preoptic Area	59.0336	Oxtl-GFP	1.9038	Elavl3-H2BRFP	1.7832	Gad1b-GFP	1.5762	Isl2bGal4-uasDendra	1.1997	Otpb.A-Nsfb-GFP	0.99727
Rhombencephalon - Glyt2 Cluster 14	58.5931	S1181tGal4-uasKaede	2.7052	SpinalBackfills	2.384	Anti-GlyR	2.3669	Glyt2-GFP	2.0308	Ptf1aGal4-uasKaede	1.9064
Rhombencephalon - Interpeduncular Nucleus	58.52	Anti-Zrf1(GFAP)	2.3936	Gad1b-GFP	1.2137	Vglut2a-GFP	1.1658	Elavl3-H2BRFP	1.0485	Oxtl-GFP	0.92206
Diencephalon - Postoptic Commissure	57.3299	Qrfp-GFP	2.371	Anti-Zrf2	2.0282	Anti-tERK	1.7485	Anti-5HT	1.6763	Anti-TH	1.4831
Ganglia - Lateral Line Neuromast SO2	57.0123	Otpb.A-Gal4-UAS-GCaMP_6	2.8555	Anti-Zrf1(GFAP)	2.8511	Isl1-GFP	2.8446	Olig2-GFP	2.7504	Pet1-GFP	2.7466
Diencephalon - Retinal Arborization Field 3 (AF3)	56.6309	Isl2bGal4-uasDendra	4.3976	Anti-Zrf2	2.5157	Anti-Gad67	2.1542	Anti-Znp1(Synaptotagmin2)	2.0719	Anti-GlyR	2.0109
Diencephalon - Hypothalamus Gad1b Cluster 2	56.6276	Qrfp-GFP	2.5743	Anti-Zrf2	2.5299	Anti-tERK	2.1378	Anti-5HT	1.7146	Anti-Znp1(Synaptotagmin2)	1.6332
Rhombencephalon - Gad1b Cluster 18	54.9948	Gad1b-GFP	2.5337	Ptf1aGal4-uasKaede	1.7186	Elavl3-H2BRFP	1.6492	Anti-5HT	1.328	S1181tGal4-uasKaede	1.293
Telencephalon - Anterior Commisure	54.28	Anti-Zrf2	5.082	Anti-tERK	3.918	Anti-Zn1	3.1206	Anti-Gad67	3.0576	Anti-5HT	2.878
Diencephalon - Hypothalamus - Intermediate Hypothalamus Neural Cluster	53.8747	EtVmat2-GFP	1.4826	Gad1b-GFP	1.097	Anti-Zn1	1.067	Anti-Zrf2	1.0417	Anti-TH	0.99654
Telencephalon - Optic Commissure	53.6952	Isl2bGal4-uasDendra	22.8483	Elavl3-GCaMP5G	2.1282	Anti-Zn12(Hnk-1)	1.8885	Anti-Zn1	1.7817	S1181tGal4-uasKaede	1.7079
Diencephalon - Optic Chiasm	53.2181	Isl2bGal4-uasDendra	33.6527	Elavl3-GCaMP5G	2.1997	Anti-Zn12(Hnk-1)	2.072	Anti-Zn1	2.0004	Elavl3-H2BRFP	1.9683
Rhombencephalon - Spinal Backfill Vestibular Population	53.0016	SpinalBackfills	4.3565	Anti-GlyR	2.9142	S1181tGal4-uasKaede	2.2579	Anti-Znp1(Synaptotagmin2)	1.9917	Anti-Zn1	1.8974
Diencephalon - Hypothalamus Vglut2 Cluster 3	52.7844	Vglut2a-GFP	2.2368	Anti-5HT	2.1111	Anti-tERK	2.0966	Elavl3-H2BRFP	2.0828	Elavl3-GCaMP5G	1.8742
Rhombencephalon - Tangential Vestibular Nucleus	52.6945	6.7FRhcrtR-Gal4-uasKaede	6.0329	Anti-Znp1(Synaptotagmin2)	1.9661	Anti-GlyR	1.9162	Anti-Zn1	1.7464	Anti-Gad67	1.3789
Rhombencephalon - Olig2 Cluster	52.67	Olig2-GFP	2.8407	Vglut2a-GFP	2.2456	Anti-5HT	1.9549	Ptf1aGal4-uasKaede	1.8299	Elavl3-H2BRFP	1.7368
Rhombencephalon - Cerebellar Neuropil 1	52.5809	Anti-Zrf2	4.3115	Anti-GlyR	2.6139	EtVmat2-GFP	2.4464	Anti-Znp1(Synaptotagmin2)	1.8958	Vglut2a-GFP	1.8047
Ganglia - Posterior Lateral Line Ganglia	52.1327	Elavl3-H2BRFP	5.8741	Anti-Zn12(Hnk-1)	3.575	Pet1-GFP	3.4059	Olig2-GFP	2.6835	Otpb.A-Gal4-UAS-GCaMP_6	2.669
Diencephalon - Dopaminergic Cluster 6 - hypothalamus	51.4495	Anti-Zrf1(GFAP)	1.436	Anti-TH	1.2787	Vglut2a-GFP	1.1315	Elavl3-H2BRFP	1.097	Gad1b-GFP	0.93945
Diencephalon - Intermediate Hypothalamus	51.1899	Anti-tERK	1.9015	Elavl3-GCaMP5G	1.6518	Anti-Zn1	1.6321	Anti-Zrf2	1.6307	Vglut2a-GFP	1.5855
Diencephalon - Hypothalamus Vglut2 Cluster 1	51.139	Vglut2a-GFP	1.8096	Elavl3-H2BRFP	1.1217	Oxtl-GFP	0.99152	Glyt2-GFP	0.96015	Olig2-GFP	0.92967
Diencephalon - Retinal Arborization Field 6 (AF6)	51.1043	Isl2bGal4-uasDendra	8.8984	Anti-Znp1(Synaptotagmin2)	5.272	Anti-Gad67	3.0613	Anti-Zn1	2.9273	Anti-Zrf2	2.1793
Rhombencephalon - Glyt2 Cluster 11	50.5581	6.7FRhcrtR-Gal4-uasKaede	3.0935	Gad1b-GFP	2.0434	Glyt2-GFP	1.5791	Elavl3-H2BRFP	1.3665	Anti-Zn1	1.3384
Diencephalon - Dopaminergic Cluster 7 - Caudal Hypothalamus	50.3939	Anti-TH	1.3426	EtVmat2-GFP	1.2776	Anti-Zrf2	1.2606	Anti-GlyR	1.2045	Anti-tERK	1.1214
Telencephalon - Postoptic Commissure	49.5962	Anti-Zrf2	3.1789	Anti-5HT	2.2836	Anti-tERK	2.2126	Qrfp-GFP	2.0784	Anti-Zn1	1.8781
Diencephalon - Dopaminergic Cluster 4/5 - posterior tuberculum and hypothalamus	49.2716	Anti-TH	2.1023	EtVmat2-GFP	1.3511	Otpb.A-Nsfb-GFP	1.2687	Elavl3-H2BRFP	1.2199	Vglut2a-GFP	1.0712
Rhombencephalon - Glyt2 Cluster 12	49.1818	6.7FRhcrtR-Gal4-uasKaede	2.6877	Anti-GlyR	1.7626	Anti-Znp1(Synaptotagmin2)	1.6073	Elavl3-H2BRFP	1.3513	Glyt2-GFP	1.3097
Diencephalon - Diffuse Nucleus of the Intermediate Hypothalamus	49.1474	Elavl3-H2BRFP	2.0763	Anti-5HT	2.0096	Anti-tERK	1.7999	Vglut2a-GFP	1.7782	Elavl3-GCaMP5G	1.5734
Ganglia - Lateral Line Neuromast D1	48.2594	Olig2-GFP	3.43	Pet1-GFP	3.4067	Otpb.A-Gal4-UAS-GCaMP_6	3.1665	Anti-Zrf1(GFAP)	3.1527	Anti-Zn12(Hnk-1)	3.0497
Diencephalon - Migrated Area of the Pretectum (M1)	47.883	Isl2bGal4-uasDendra	2.0539	Anti-Zrf2	1.9355	Anti-Znp1(Synaptotagmin2)	1.9299	Anti-Gad67	1.6029	Anti-Zrf1(GFAP)	1.5714
Diencephalon - Otpb Cluster 1	47.3855	Anti-TH	2.5241	EtVmat2-GFP	1.5293	Otpb.A-Nsfb-GFP	1.5242	Hcrt-RFP	1.3859	Anti-Zrf2	1.3651
Rhombencephalon - Gad1b Cluster 14	47.2345	6.7FRhcrtR-Gal4-uasKaede	1.9943	Elavl3-H2BRFP	1.7758	Vglut2a-GFP	1.6299	Anti-Zn1	1.4926	Anti-5HT	1.2941
Ganglia - Lateral Line Neuromast O1	46.5646	Pet1-GFP	5.3703	Otpb.A-Gal4-UAS-GCaMP_6	5.1739	Olig2-GFP	4.2808	Anti-Zn12(Hnk-1)	4.1294	Anti-Zrf1(GFAP)	4.0767
Diencephalon - Oxtl Cluster 4 - sparse in hypothalamus	45.5944	EtVmat2-GFP	1.2261	Oxtl-GFP	1.221	Vglut2a-GFP	1.1157	Elavl3-H2BRFP	1.1125	Anti-Zrf2	1.0326
Rhombencephalon - Glyt2 Cluster 9	45.5235	Anti-Znp1(Synaptotagmin2)	1.6378	Anti-GlyR	1.5852	Anti-Zrf2	1.5036	Anti-Zn1	1.4283	Anti-TH	1.384
Rhombencephalon - Vmat2 Cluster 1	45.019	EtVmat2-GFP	2.48	S1181tGal4-uasKaede	1.8887	Elavl3-H2BRFP	1.6143	Vglut2a-GFP	1.5713	Elavl3-GCaMP5G	0.9693
Diencephalon - Hypothalamus Gad1b Cluster 1	43.9882	Gad1b-GFP	1.765	Elavl3-GCaMP5G	1.4308	Anti-Zrf2	1.36	Anti-Zn1	1.3362	Anti-5HT	1.2956
Diencephalon - Hypothalamus Vglut2 Cluster 4	43.0256	Vglut2a-GFP	1.8764	Elavl3-H2BRFP	1.3121	Gad1b-GFP	1.1543	Anti-TH	1.146	Anti-tERK	1.1336
Diencephalon - Caudal Hypothalamus	42.2236	Anti-5HT	1.8195	EtVmat2-GFP	1.5843	Anti-GlyR	1.5804	Anti-Zrf2	1.3932	Gad1b-GFP	1.1734
Diencephalon - Retinal Arborization Field 5 (AF5)	42.1538	Isl2bGal4-uasDendra	4.6022	Anti-Gad67	3.2623	Anti-Zrf2	3.239	Anti-Znp1(Synaptotagmin2)	3.1824	Anti-Zn1	3.1287
Diencephalon - Migrated Posterior Tubercular Area (M2)	40.6975	Vglut2a-GFP	1.4096	Gad1b-GFP	1.3591	Anti-Zrf2	1.2318	Anti-Zn1	1.2141	Elavl3-H2BRFP	1.2079
Rhombencephalon - Glyt2 Cluster 13	40.5921	Anti-Znp1(Synaptotagmin2)	3.5272	Anti-GlyR	2.8167	Anti-Gad67	2.7893	Anti-Zn1	2.6415	Glyt2-GFP	2.4466
Rhombencephalon - Neuropil Region 4	40.5034	Anti-Znp1(Synaptotagmin2)	4.521	Anti-Gad67	3.7789	Anti-GlyR	3.5832	Anti-Zn1	3.1755	Anti-Zrf2	2.7926
Diencephalon - Hypothalamus Vglut2 Cluster 2	37.4171	Vglut2a-GFP	2.5099	Anti-5HT	1.5364	Elavl3-H2BRFP	1.5301	Gad1b-GFP	1.4693	Anti-Zn1	1.337
Spinal Cord - Vmat2 Stripe1	36.8031	Elavl3-H2BRFP	2.8192	6.7FRhcrtR-Gal4-uasKaede	2.6649	Gad1b-GFP	2.0384	Anti-GlyR	1.4728	Anti-5HT	1.3478
Rhombencephalon - Otpb Cluster 1	36.1383	Vglut2a-GFP	1.805	Elavl3-H2BRFP	1.6128	Otpb.A-Nsfb-GFP	1.5191	EtVmat2-GFP	1.3727	S1181tGal4-uasKaede	1.2775
Diencephalon - Hypothalamus Vglut2 Cluster 5	34.3073	Vglut2a-GFP	1.5349	Anti-Zrf1(GFAP)	1.1328	Gad1b-GFP	1.1152	Ptf1aGal4-uasKaede	1.0762	Anti-Zrf2	1.0616
Telencephalon - Subpallial Otpb strip	32.9947	Vglut2a-GFP	1.4329	Oxtl-GFP	1.0831	Anti-GlyR	0.96839	Elavl3-H2BRFP	0.84979	Otpb.A-Nsfb-GFP	0.8406
Rhombencephalon - RoL2	31.8346	Anti-Zrf2	2.0054	SpinalBackfills	1.8761	Anti-Znp1(Synaptotagmin2)	1.5454	S1181tGal4-uasKaede	1.4462	Anti-GlyR	1.422
Rhombencephalon - Otpb Cluster 5	28.6554	Otpb.A-Nsfb-GFP	2.05	S1181tGal4-uasKaede	1.7228	Elavl3-H2BRFP	1.5078	Glyt2-GFP	1.3255	Anti-Zrf1(GFAP)	1.0594
Diencephalon - Hypothalamus - Caudal Hypothalamus Neural Cluster	28.6234	Anti-5HT	2.7838	EtVmat2-GFP	2.1169	Anti-GlyR	1.8356	Anti-Zrf2	1.3564	Ptf1aGal4-uasKaede	1.3061
Ganglia - Facial glossopharyngeal ganglion	26.4324	Elavl3-H2BRFP	1.9626	Elavl3-GCaMP5G	1.0543	Oxtl-GFP	0.99776	Gad1b-GFP	0.99399	Isl2bGal4-uasDendra	0.97408
Diencephalon - Pituitary	26.3248	Anti-Zrf1(GFAP)	1.399	Vglut2a-GFP	1.3678	Oxtl-GFP	1.0986	Anti-TH	1.09	Olig2-GFP	1.0621
Diencephalon - Otpb Cluster 3	20.4033	Vglut2a-GFP	2.0069	Otpb.A-Nsfb-GFP	1.8591	Elavl3-H2BRFP	1.6437	Isl2bGal4-uasDendra	1.533	Anti-GlyR	1.4339
Rhombencephalon - Noradrendergic neurons of the Interfascicular and Vagal areas	15.1538	Vglut2a-GFP	2.5229	EtVmat2-GFP	2.0983	Anti-5HT	2.057	Elavl3-H2BRFP	1.993	Anti-Zrf1(GFAP)	1.768
Diencephalon - Preoptic area Vglut2 cluster	13.2179	Anti-Zrf2	3.5997	Anti-5HT	2.7807	Anti-tERK	2.6161	Otpb.A-Gal4-UAS-GCaMP_6	2.4604	Anti-Zn1	2.4526
Diencephalon - Anterior preoptic dopaminergic cluster	13.1397	Gad1b-GFP	2.6155	Otpb.A-Nsfb-GFP	2.3312	Anti-TH	2.1123	Elavl3-H2BRFP	1.7569	Anti-5HT	1.6254
Diencephalon - Preoptic Otpb Cluster	11.9123	Otpb.A-Nsfb-GFP	2.5979	Anti-Zrf2	2.595	Anti-Zn1	2.1114	Otpb.A-Gal4-UAS-GCaMP_6	2.1001	Anti-5HT	2.0624
Spinal Cord - Glyt2 Stripe	1.7051	Elavl3-H2BRFP	2.7601	6.7FRhcrtR-Gal4-uasKaede	2.1738	Gad1b-GFP	2.0427	Anti-GlyR	2.001	Elavl3-GCaMP5G	1.8578
Spinal Cord - Neurons with descending projections labelled by spinal backfills	0.81665	Elavl3-H2BRFP	2.7833	Anti-GlyR	2.003	Anti-Zn1	1.7154	Anti-Zrf2	1.5995	Elavl3-GCaMP5G	1.5913
